# Supplementary material for: Stereotype-based stressors facilitate emotional memory neural network connectivity and encoding of negative information to degrade math self-perceptions among women
Source: PubMed Central journal article supplement — Soc Cogn Affect Neurosci. 2018 Jun 25;13(7):719–40. doi: 10.1093/scan/nsy043 (PMC6121152; doi:10.1093/scan/nsy043), 2018-06-25
Supplement: nsy043_supp.pdf [file nsy043_supp.pdf]

## Supplementary Results Section

*Supplemental Figure 1. Distribution of all EMG amplitudes elicited to startle probes as a function of (a) negative and (b) positive feedback. Quadratic lines of best fit are overlaid on the amplitude distributions to demonstrate the quadratic relationship exhibited by women in the DMT condition. Note that the quadratic curve for positive feedback among DMT women (b) was not significant in the statistical model, whereas the quadratic curve for negative feedback among DMT women (a) was significant.*

(a)

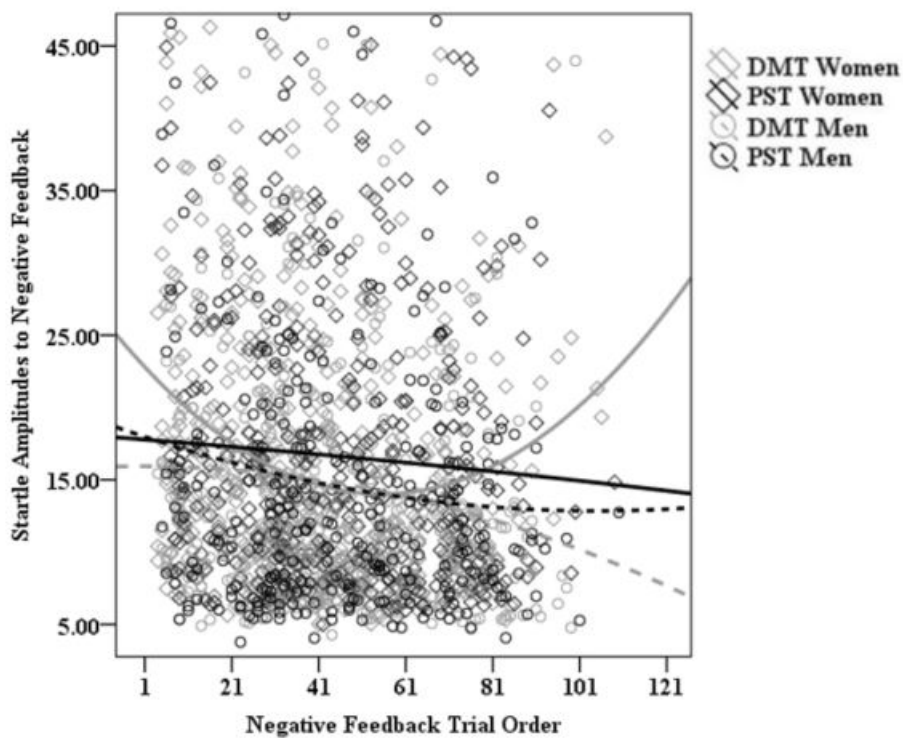

(b)

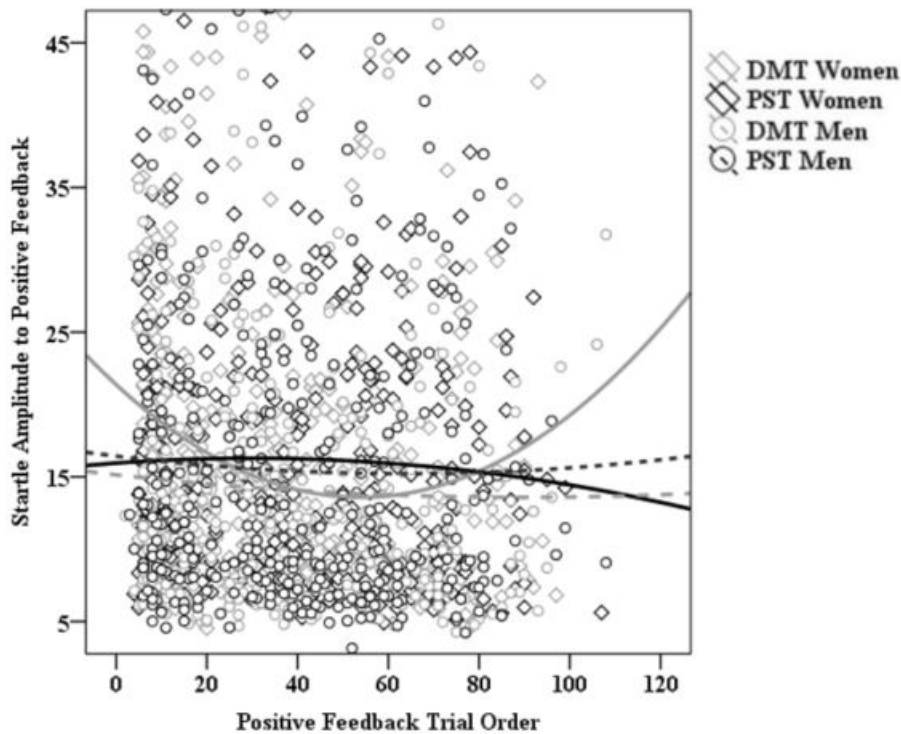

### *Math devaluing and self-enhancement*

To quantify math self-perceptions, two ANOVAs were performed on math valuing questions and math self-assessments. An initial 2 (Gender: Men or Women) x 2 (Condition: DMT or PST) factorial ANOVAs was conducted on participants' math valuing mean composite scores. This analysis yielded no main effects or interactions ( $p$ 's > .08).

An additional 2 (Gender: Men or Women) x 2 (Condition: DMT or PST) factorial ANOVAs was conducted on participants' math self-enhancement. This analysis also yielded no main effects or interactions ( $p$ 's > .15).

### *Basic Graph theory analyses*

The following analyses excluded the same individuals as the main text mediation and moderation analyses. Degrees of freedom may vary due to participants not having enough valid

EEG trials. A 2 (Gender: Men, Women) x 2 (Task Description: DMT, PST) x 2 (Feedback Type: Wrong, Correct) x 4 (Frequency Band: theta, alpha, beta, gamma) mixed factors ANOVA with repeated measures on the latter variable was conducted on participant's emotional network subnetwork modularity variables, emotional network select network modularity variables, semantic memory network variables, and semantic memory network select network modularity variables.

#### *Emotional Network Subnetwork Modularity*

Analyses on the emotional network subnetwork modularity to hits revealed a main effect for frequency band,  $F(3, 78)=4.632, p=.005, \eta^2=.151$ . A marginal interaction between feedback type and frequency band was also apparent,  $F(1, 80)=3.470, p=.066, \eta^2=.042$ . There was also an interaction between feedback type, frequency band, condition, and gender  $F(3, 78)=2.727, p=.050, \eta^2=.095$ . Simple effects analyses indicated that emotional network subnetwork modularity was greatest in the alpha ( $p=.003$ ) and beta ( $p=.017$ ) frequency bands to all feedback in comparison to the theta frequency band and that the emotional network subnetwork modularity was lowest in the theta frequency band in comparison to the other frequency bands ( $p's<.05$ ). Specifically, for positive feedback, emotional network subnetwork modularity was greatest in the alpha and beta frequency bands in comparison to the theta frequency band ( $p's<.05$ ). For negative feedback the emotional network subnetwork modularity was greatest in the alpha frequency band in comparison to theta and beta frequency bands ( $p's<.18$ ).

Analyses on the emotion network subnetwork modularity to false alarms revealed a main effect for frequency band,  $F(3, 133)=15.704, p<.01, \eta^2=.262$ . Simple effects indicated that emotion network subnetwork modularity to all false alarms was greatest in the alpha, beta, and

gamma frequency bands in comparison to theta frequency band ( $p$ 's < .001). No other effects were significant ( $p$ 's > .07).

Analyses on the emotion network subnetwork modularity to misses revealed a main effect for frequency band,  $F(3, 116)=4.333, p=.006, \eta^2=.101$ , indicating that emotion network Subnetwork Modularity to all misses was greatest in the alpha, beta, and gamma frequency bands in comparison to theta ( $p$ 's < .05). No other effects were significant ( $p$ 's > .10).

Analyses on the emotion network subnetwork modularity to correct rejections revealed a main effect for frequency band,  $F(3, 133)=9.276, p<.001, \eta^2=.173$ . A significant interaction between feedback type and frequency band was also found,  $F(3, 133)=3.741, p=.013, \eta^2=.078$ . Simple effects revealed that subnetwork modularity to correct rejections in the gamma and alpha was greater than the theta frequency band ( $p<.05$ ). Subnetwork modularity to correct rejections was also greater in the gamma frequency band in comparison to the theta frequency band ( $p<.001$ ). No other effects were significant ( $p$ 's > .244).

#### *Emotion Network Select Network Modularity*

Analyses on the emotion network select network modularity to hits revealed a main effect for frequency band  $F(3, 78)=10.491, p<.001, \eta^2=.287$  Simple effects indicated that emotion network select network modularity was greatest in the alpha, beta, and gamma frequency bands in comparison to the theta frequency band ( $p$ 's < .001). No other effects were significant ( $p$ 's > .09)

Analyses on the emotion network select network modularity to false alarms revealed a main effect for frequency band,  $F(3, 133)=47.932, p<.001, \eta^2=.520$ . An interaction between feedback type, frequency, and gender was also shown,  $F(3, 133)=2.847, p = .040, \eta^2=.060$ . Simple effects indicated that emotion network select network modularity was greatest in the alpha, beta, and gamma frequency bands to all feedback false alarms in comparison to the theta

frequency band ( $p's < .001$ ). Specifically in the gamma frequency band, select network modularity to false alarms was greater to negative feedback than positive feedback in the PST condition ( $p = .017$ ). No other effects were significant ( $p's > .09$ ).

Analyses on the emotion network select network modularity to misses revealed a main effect for frequency band  $F(3, 116) = 18.528, p < .001, \eta^2 = .324$ . An interaction was found between feedback type, condition, and frequency band  $F(3, 116) = 3.449, p < .019, \eta^2 = .082$ . Simple effects indicated that emotion network select network modularity was greatest in the alpha, beta, and gamma frequency bands to misses in comparison to theta ( $p's < .001$ ). Specifically for positive feedback in the DMT condition, select network modularity was greatest in the alpha, beta, and gamma frequency bands in comparison to theta ( $p's < .001$ ). In the PST condition select network modularity to positive feedback was greatest in the alpha and beta frequency bands in comparison to theta ( $p's < .05$ ). For negative feedback in the DMT condition, select network modularity was greatest in the alpha, beta, and gamma frequency bands in comparison to theta ( $p's < .05$ ). In the PST condition select network modularity to negative feedback was greatest in the alpha, beta and gamma frequency bands as well in comparison to theta ( $p's < .001$ ). No other effects were significant ( $p's > .09$ ).

Analyses on the emotion network select network modularity to correct rejections revealed a main effect for frequency band  $F(3, 133) = 57.738, p < .001, \eta^2 = .566$ . Simple effects revealed that select network modularity to correct rejections was greatest in the alpha and gamma frequency band in comparison to theta ( $p's < .01$ ). select network modularity in the beta band was also greater in comparison to the alpha frequency band ( $p = .002$ ). In comparison to the gamma frequency band, select network modularity in the beta frequency band was also greater ( $p < .001$ ). No other effects were significant ( $p's > .23$ ).

*Semantic Memory Network Subnetwork Modularity*

Analyses on the semantic memory network subnetwork modularity to hits revealed no significant effects ( $p$ 's > .08).

Analyses on the semantic memory network subnetwork modularity to false alarms revealed a main effect for frequency  $F(3, 133)=94.196, p<.001, \eta^2=.680$ . An interaction between feedback type and frequency band was also apparent,  $F(3, 133)=3.500, p=.017, \eta^2=.073$ . Simple effects indicated that semantic memory subnetwork modularity was greatest in the alpha, beta, and gamma frequency bands in comparison to the theta frequency band ( $p$ 's < .001). Semantic memory network subnetwork modularity was also greater in the alpha frequency band in comparison to gamma ( $p<.001$ ), and in the beta frequency band in comparison to gamma ( $p<.001$ ). In the theta frequency band specifically subnetwork modularity was greater for negative feedback in comparison to positive feedback ( $p=.005$ ). No other effects were significant ( $p$ 's > .21).

Analyses on the semantic memory network subnetwork modularity to misses revealed a main effect for frequency  $F(3, 116)=5.675, p=.001, \eta^2=.128$ . An interaction between frequency band, condition, and gender was found,  $F(3,116)= 3.147, p=.028, \eta^2=.075$ . Simple effects indicated that indicating that semantic memory network subnetwork modularity was greatest in the alpha, beta, and gamma frequency bands to misses in comparison to the theta frequency band ( $p$ 's < .01). Specifically in the gamma frequency band for negative feedback misses, semantic memory subnetwork modularity was greater in the DMT condition than the PST condition ( $p=.001$ ). No other effects were significant ( $p$ 's > .12).

Analyses on the semantic memory network subnetwork modularity to correct rejections revealed a main effect for frequency  $F(3, 133)=169.154, p<.001, \eta^2=.792$ . Simple effects

revealed that semantic memory network subnetwork modularity to correct rejections was highest in the beta frequency band in comparison to all other frequency bands ( $p's < .05$ ). Semantic memory network subnetwork modularity was also lowest in the theta frequency band in comparison to all the other frequency bands ( $p's < .001$ ). Semantic memory network subnetwork modularity to correct rejections was also higher in alpha in comparison to the gamma frequency band ( $p < .001$ ). No other effects were significant ( $p's > .14$ ).

#### *Semantic Memory Network Select Network Modularity*

Analyses on the semantic memory network select network modularity to hits revealed a main effect for feedback type,  $F(1, 80) = 10.510$ ,  $p = .002$ ,  $\eta^2 = .116$ . An interaction was found between frequency band and gender,  $F(3, 78) = 2.775$ ,  $p = .047$ ,  $\eta^2 = .096$ . An interaction was found between feedback type and frequency,  $F(3, 78)$ ,  $p = .036$ ,  $\eta^2 = .103$ . A final three way interaction between feedback type, frequency band, and condition was also found  $F(3, 78) = 2.767$ ,  $p = .047$ ,  $\eta^2 = .096$ . Simple effects revealed that semantic memory network select network modularity to hits was greater to negative feedback than positive feedback ( $p = .002$ ). In comparison to the theta frequency band, semantic memory network select network modularity to hits was greater in the beta frequency band ( $p = .049$ ). For females specifically, semantic memory network select network modularity to hits was greater in the alpha and beta frequency bands in comparison to the theta frequency band ( $p's < .05$ ). For males, select network modularity was greater in the beta frequency band than the alpha frequency band ( $p = .048$ ). For alpha, beta and gamma frequency bands select network modularity was higher for negative feedback than positive feedback ( $p's < .05$ ). In the PST condition in the beta frequency band select network modularity was higher for negative feedback in comparison to positive feedback ( $p = .001$ ). For beta and gamma

frequency bands, select network modularity was higher for negative feedback than positive feedback ( $p's < .05$ ). No other effects were significant ( $p's > .23$ ).

Analyses on the semantic memory network select network modularity to false alarms revealed a main effect for frequency  $F(3, 133)=9.447, p < .01, \eta^2=.176$ , indicating that semantic memory network subnetwork modularity was greatest in the alpha, beta, and gamma frequency bands to false alarms in comparison to the theta frequency band ( $p's < .001$ ). No other effects were significant ( $p's > .07$ ).

Analyses on the semantic memory network select network modularity to misses revealed a main effect for frequency  $F(3, 116)=5.515, p=.001, \eta^2=.125$ . An interaction between frequency band, condition, and feedback type was found ( $F(3,116)=3.518, p=.017, \eta^2=.083$ ). Simple effects revealed that semantic memory network select network modularity was greatest in the alpha, beta, and gamma frequency bands to misses in comparison to the theta frequency band ( $p's < .05$ ). In the theta frequency band specifically, select network modularity was greater for negative feedback than positive feedback in the PST condition ( $p=.036$ ). In the beta frequency band select network modularity to misses was greater for positive feedback in the DMT condition ( $p=.046$ ). No other effects were significant ( $p's > .11$ ).

Analyses on the semantic memory network select network modularity to correct rejections revealed a main effect for frequency band  $F(3, 133)=17.133, p < .001, \eta^2=.279$ . An interaction between feedback type and condition was also found  $F(1, 135)=5.145, p=.025, \eta^2=.037$ . Simple effect revealed that select network modularity was greatest in alpha, beta, and gamma frequency bands in comparison to theta ( $P, .01$ ). In comparison to gamma, the SM in the beta and alpha frequency bands were also higher ( $p's < .001$ ). For positive feedback, select



network modularity was also greater in the DMT condition in comparison to the PST condition ( $p=.05$ ). No other effects were significant ( $p's>.14$ ).

#### *Additional double moderated mediation results*

The results from our double moderated mediation revealed that when utilizing startle responses to negative feedback as a predictor, emotion network connectivity measured by Subnetwork modularity in the beta frequency band in response to negative hit memory trials as the mediator, Dprime for negative fonts as the outcome variable, and condition and gender as the two moderator variables, an indirect pathway was significant for women in the DMT condition. We found another significant indirect pathway for negative feedback correct rejection trials in the theta and alpha frequency bands as well. Other double moderated meditation models that included other negative and positive font related variables, emotion network connectivity measured by subnetwork modularity on trials in the memory test associated with hits, misses, false alarms and correct rejections of negative and positive feedback were not found to be significant (Tables, 1, 2, 3, and 4). In addition to this, we tested these 32 models using select network modularity of the emotion network and found no significant indirect effects between the startle response and DPrime (Tables 5, 6, 7, and 8).

#### *Additional double moderated regression results*

The results from our double moderated regression suggested that men encoded negative feedback more accurately to the extent they exhibited greater connectivity within the semantic network using select network modularity in the gamma band during trials in which they accurately identified previously seen fonts associated with negative feedback. We tested this model using both negative and positive feedback variables and semantic memory network connectivity on trials in the memory test associated with hits, misses, false alarms, and correct

rejections of negative and positive feedback in all frequency bands (32 models). These models revealed that our main finding was also seen with men in the control condition in the beta frequency band ( $b=13.8953$  95% CI [1.2088, 26.5818]). Other effects were found with correct rejections. DMT men could correctly recall negative feedback they had seen before more accurately to the extent they exhibited greater connectivity within the semantic network (select network modularity) in the theta frequency band during trials in which they accurately rejected novel fonts associated with negative feedback ( $b=20.2828$ , 95%CI[1.9267,38.6388]). This exact relationship was also found with DMT men in the gamma frequency band ( $b=16.5945$ , 95%CI[1.9509,31.2381]). PST men had the opposite effect, they could not accurately recall negative feedback to the extent they exhibited this connectivity to correct reject trials to negative feedback in the theta frequency band ( $b=16.6976$ , 95%CI[-31.8418, -1.5535]).

Regarding positive feedback, DMT women also demonstrated a few relationships. DMT women could not accurately recall positive feedback they had seen before to the extent they exhibited greater connectivity within the semantic network using select network modularity in the alpha band during trials in which they accurately rejected fonts associated with positive feedback they had not seen before ( $b=-18.6873$ , 95%CI[-36.8257, -.5490]). This exact relationship was also observed in the gamma frequency band ( $b=-19.7003$ , 95%CI[-35.9866, -3.4139]). This suggests that women could recall what positive feedback they saw less accurately to the extent that they exhibited greater connectivity within the semantic network in these frequency bands during trials associated with positive lures. No other indirect effects were significant (Tables 9-16).

*Semantic Memory Encoding of Negative Feedback Enhances Math Performance for Males.*

The following analyses excluded the same participants excluded for basic memory and startle analyses. To determine whether there was a link between semantic memory encoding for negative feedback and performance on the font math task, a double moderation was performed. We tested for this by deriving unstandardized regression coefficients and 95% bias-corrected confidence intervals (CIs) from 10,000 bootstrap estimates (Hayes, 2013; model 2). 95% CIs were considered significant if the confidence interval did not contain zero (Cumming, 2008). We tested separate models for semantic memory network connectivity to positive and negative feedback (subnetwork and select network modularity values) in each frequency band (16 models total, Tables 17 & 18).

These analyses revealed a positive relationship for DMT men,  $b=3.4981$ , 95%CI [.1281, 6.8680], and PST men,  $b=5.0802$ , 95%CI [1.3569, 8.8035], in the theta frequency band. For men, the more semantic memory network connectivity (Subnetwork modularity) they had during negative feedback encoding the better they performed on the font task overall. This relationship was not present for women in either condition ( $p's > .40$ ). Using select network modularity to measure semantic memory network connectivity to negative feedback DMT women in the theta frequency band showed a negative relationship between semantic memory encoding to negative feedback and performance,  $b=-3.9709$ , 95%CI[-7.8572, -.0846]. In other words, the more they encoded negative feedback through a semantic memory process the worse they performed. mirrored our findings with subnetwork modularity above. This relationship was also found with positive feedback in the beta frequency band for DMT women,  $b=-5.8660$ , 95%CI[-9.5849, -2.1417]. No other relationships were found. This suggests that semantic memory network connectivity to negative feedback may modulate performance in different ways for men and

women in different contexts, having an overall positive effect for men and an overall negative effect for women.

### Supplementary tables:

Table 1: Emotion Network Subnetwork Modularity Models to Hits

| Table 1                                                               |           |                     |         |
|-----------------------------------------------------------------------|-----------|---------------------|---------|
| Alternative Moderated Mediation Models; Subnetwork Modularity to Hits |           |                     |         |
| Model                                                                 | Condition | Confidence Interval |         |
|                                                                       |           | ULCI                | LLCI    |
| Subnetwork Modularity Hits to Negative Feedback Theta                 | DMT Women | -0.0033             | 0.0069  |
|                                                                       | PST Women | -0.0011             | 0.0074  |
|                                                                       | DMT Men   | -0.0111             | 0.0093  |
|                                                                       | PST Men   | -0.0024             | 0.0119  |
| Subnetwork Modularity Hits to Negative Feedback Alpha                 | DMT Women | -0.004              | 0.0043  |
|                                                                       | PST Women | -0.0017             | 0.0114  |
|                                                                       | DMT Men   | -0.0108             | 0.0246  |
|                                                                       | PST Men   | -0.0193             | 0.002   |
| Subnetwork Modularity Hits to Negative Feedback Beta                  | DMT Women | 0.0013*             | 0.0185* |
|                                                                       | PST Women | -0.0021             | 0.0069  |
|                                                                       | DMT Men   | -0.0017             | 0.0286  |
|                                                                       | PST Men   | -0.0041             | 0.0261  |
| Subnetwork Modularity Hits to Negative Feedback Gamma                 | DMT Women | -0.002              | 0.006   |
|                                                                       | PST Women | -0.001              | 0.0068  |
|                                                                       | DMT Men   | -0.0023             | 0.0128  |
|                                                                       | PST Men   | -0.0035             | 0.0109  |
| Subnetwork Modularity Hits to Correct Feedback Theta                  | DMT Women | -0.0023             | 0.0172  |
|                                                                       | PST Women | -0.014              | 0.0015  |
|                                                                       | DMT Men   | -0.0108             | 0.005   |
|                                                                       | PST Men   | -0.0029             | 0.0208  |
| Subnetwork Modularity Hits to Correct Feedback Alpha                  | DMT Women | -0.0098             | 0.0142  |
|                                                                       | PST Women | -0.0019             | 0.0089  |
|                                                                       | DMT Men   | -0.0098             | 0.0051  |
|                                                                       | PST Men   | -0.018              | 0.0036  |
| Subnetwork Modularity Hits to Correct Feedback Beta                   | DMT Women | -0.011              | 0.0042  |
|                                                                       | PST Women | -0.0121             | 0.0024  |
|                                                                       | DMT Men   | -0.0152             | 0.0062  |
|                                                                       | PST Men   | -0.0032             | 0.0073  |
| Subnetwork Modularity Hits to Correct Feedback Gamma                  | DMT Women | -0.016              | 0.005   |
|                                                                       | PST Women | -0.0023             | 0.0159  |
|                                                                       | DMT Men   | -0.0034             | 0.0126  |
|                                                                       | PST Men   | -0.0197             | 0.0042  |

Table 1

Table 2: Emotion Network Subnetwork Modularity Models to Misses

| Table 2                                                                 |           |                     |        |
|-------------------------------------------------------------------------|-----------|---------------------|--------|
| Alternative Moderated Mediation Models; Subnetwork Modularity to Misses |           |                     |        |
| Model                                                                   | Condition | Confidence Interval |        |
|                                                                         |           | ULCI                | LLCI   |
| Subnetwork Modularity Misses to Negative Feedback Theta                 | DMT Women | -0.0052             | 0.0016 |
|                                                                         | PST Women | -0.0012             | 0.0020 |
|                                                                         | DMT Men   | -0.0023             | 0.0094 |
|                                                                         | PST Men   | -0.0130             | 0.0027 |
| Subnetwork Modularity Misses to Negative Feedback Alpha                 | DMT Women | -0.0034             | 0.0052 |
|                                                                         | PST Women | -0.0051             | 0.0018 |
|                                                                         | DMT Men   | -0.0169             | 0.0027 |
|                                                                         | PST Men   | -0.0089             | 0.0027 |
| Subnetwork Modularity Misses to Negative Feedback Beta                  | DMT Women | -0.0031             | 0.0060 |
|                                                                         | PST Women | -0.0046             | 0.0011 |
|                                                                         | DMT Men   | -0.0030             | 0.0221 |
|                                                                         | PST Men   | -0.0053             | 0.0037 |
| Subnetwork Modularity Misses to Negative Feedback Gamma                 | DMT Women | -0.0047             | 0.0023 |
|                                                                         | PST Women | -0.0012             | 0.0031 |
|                                                                         | DMT Men   | -0.0022             | 0.0178 |
|                                                                         | PST Men   | -0.0087             | 0.0030 |
| Subnetwork Modularity Misses to Correct Feedback Theta                  | DMT Women | -0.0088             | 0.0082 |
|                                                                         | PST Women | -0.0032             | 0.0099 |
|                                                                         | DMT Men   | -0.0152             | 0.0057 |
|                                                                         | PST Men   | -0.0109             | 0.0088 |
| Subnetwork Modularity Misses to Correct Feedback Alpha                  | DMT Women | -0.0065             | 0.0031 |
|                                                                         | PST Women | -0.0024             | 0.0106 |
|                                                                         | DMT Men   | -0.0211             | 0.0007 |
|                                                                         | PST Men   | -0.0234             | 0.0033 |
| Subnetwork Modularity Misses to Correct Feedback Beta                   | DMT Women | -0.0031             | 0.0075 |
|                                                                         | PST Women | -0.0083             | 0.0052 |
|                                                                         | DMT Men   | -0.0219             | 0.0017 |
|                                                                         | PST Men   | -0.0222             | 0.0009 |
| Subnetwork Modularity Misses to Correct Feedback Gamma                  | DMT Women | -0.0028             | 0.0071 |
|                                                                         | PST Women | -0.0064             | 0.0018 |
|                                                                         | DMT Men   | -0.0129             | 0.0028 |
|                                                                         | PST Men   | -0.0070             | 0.0151 |

Table 2

Table 3: Emotion Network Subnetwork Modularity Models to False Alarms

| Table 3                                                                       |                  |                            |             |
|-------------------------------------------------------------------------------|------------------|----------------------------|-------------|
| Alternative Moderated Mediation Models: Subnetwork Modularity to False Alarms |                  |                            |             |
| <u>Model</u>                                                                  | <u>Condition</u> | <u>Confidence Interval</u> |             |
|                                                                               |                  | <u>ULCI</u>                | <u>LLCI</u> |
| Subnetwork Modularity False Alarms to Negative Feedback Theta                 | DMT Women        | -0.0017                    | 0.0131      |
|                                                                               | PST Women        | -0.0020                    | 0.0020      |
|                                                                               | DMT Men          | -0.0092                    | 0.0043      |
|                                                                               | PST Men          | -0.0112                    | 0.0020      |
| Subnetwork Modularity False Alarms to Negative Feedback Alpha                 | DMT Women        | -0.0006                    | 0.0116      |
|                                                                               | PST Women        | -0.0123                    | 0.0008      |
|                                                                               | DMT Men          | -0.0189                    | 0.0009      |
|                                                                               | PST Men          | -0.0143                    | 0.0019      |
| Subnetwork Modularity False Alarms to Negative Feedback Beta                  | DMT Women        | -0.0018                    | 0.0141      |
|                                                                               | PST Women        | -0.0022                    | 0.0047      |
|                                                                               | DMT Men          | -0.0089                    | 0.0034      |
|                                                                               | PST Men          | -0.0047                    | 0.0027      |
| Subnetwork Modularity False Alarms to Negative Feedback Gamma                 | DMT Women        | -0.0005                    | 0.0113      |
|                                                                               | PST Women        | -0.0032                    | 0.0022      |
|                                                                               | DMT Men          | -0.0089                    | 0.0015      |
|                                                                               | PST Men          | -0.0021                    | 0.0048      |
| Subnetwork Modularity False Alarms to Correct Feedback Theta                  | DMT Women        | -0.0052                    | 0.0025      |
|                                                                               | PST Women        | -0.0014                    | 0.0082      |
|                                                                               | DMT Men          | -0.0113                    | 0.0030      |
|                                                                               | PST Men          | -0.0044                    | 0.0188      |
| Subnetwork Modularity False Alarms to Correct Feedback Alpha                  | DMT Women        | -0.0020                    | 0.0107      |
|                                                                               | PST Women        | -0.0058                    | 0.0067      |
|                                                                               | DMT Men          | -0.0039                    | 0.0035      |
|                                                                               | PST Men          | -0.0013                    | 0.0155      |
| Subnetwork Modularity False Alarms to Correct Feedback Beta                   | DMT Women        | -0.0060                    | 0.0026      |
|                                                                               | PST Women        | -0.0116                    | 0.0022      |
|                                                                               | DMT Men          | -0.0056                    | 0.0039      |
|                                                                               | PST Men          | -0.0029                    | 0.0094      |
| Subnetwork Modularity False Alarms to Correct Feedback Gamma                  | DMT Women        | -0.0037                    | 0.0075      |
|                                                                               | PST Women        | -0.0025                    | 0.0093      |
|                                                                               | DMT Men          | -0.0057                    | 0.0026      |
|                                                                               | PST Men          | -0.0022                    | 0.0200      |

Table 3

Table 4: Emotion Network Subnetwork Modularity Models to Correct Rejections

| Table 4                                                                             |                  |                            |             |
|-------------------------------------------------------------------------------------|------------------|----------------------------|-------------|
| Alternative Moderated Mediation Models: Subnetwork Modularity to Correct Rejections |                  |                            |             |
| <u>Model</u>                                                                        | <u>Condition</u> | <u>Confidence Interval</u> |             |
|                                                                                     |                  | <u>ULCI</u>                | <u>LLCI</u> |
| Subnetwork Modularity Correct Rejections to Negative Feedback Theta                 | DMT Women        | 0.0002*                    | 0.0069*     |
|                                                                                     | PST Women        | -0.0014                    | 0.0045      |
|                                                                                     | DMT Men          | -0.0084                    | 0.0015      |
|                                                                                     | PST Men          | -0.0084                    | 0.0024      |
| Subnetwork Modularity Correct Rejections to Negative Feedback Alpha                 | DMT Women        | -0.0117*                   | -0.0001*    |
|                                                                                     | PST Women        | -0.0033                    | 0.0017      |
|                                                                                     | DMT Men          | -0.0095                    | 0.0045      |
|                                                                                     | PST Men          | -0.0076                    | 0.0026      |
| Subnetwork Modularity Correct Rejections to Negative Feedback Beta                  | DMT Women        | -0.0070                    | 0.0046      |
|                                                                                     | PST Women        | -0.0038                    | 0.0021      |
|                                                                                     | DMT Men          | -0.0079                    | 0.0023      |
|                                                                                     | PST Men          | -0.0027                    | 0.0052      |
| Subnetwork Modularity Correct Rejections to Negative Feedback Gamma                 | DMT Women        | -0.0029                    | 0.0030      |
|                                                                                     | PST Women        | -0.0059                    | 0.0053      |
|                                                                                     | DMT Men          | -0.0097                    | 0.0059      |
|                                                                                     | PST Men          | -0.0093                    | 0.0027      |
| Subnetwork Modularity Correct Rejections to Correct Feedback Theta                  | DMT Women        | -0.0064                    | 0.0046      |
|                                                                                     | PST Women        | -0.0027                    | 0.0127      |
|                                                                                     | DMT Men          | -0.0015                    | 0.0167      |
|                                                                                     | PST Men          | -0.0147                    | 0.0019      |
| Subnetwork Modularity Correct Rejections to Correct Feedback Alpha                  | DMT Women        | -0.0064                    | 0.0046      |
|                                                                                     | PST Women        | -0.0027                    | 0.0127      |
|                                                                                     | DMT Men          | -0.0015                    | 0.0167      |
|                                                                                     | PST Men          | -0.0147                    | 0.0019      |
| Subnetwork Modularity Correct Rejections to Correct Feedback Beta                   | DMT Women        | -0.0131                    | 0.0025      |
|                                                                                     | PST Women        | -0.0056                    | 0.0080      |
|                                                                                     | DMT Men          | -0.0018                    | 0.0136      |
|                                                                                     | PST Men          | -0.0112                    | 0.0116      |
| Subnetwork Modularity Correct Rejections to Correct Feedback Gamma                  | DMT Women        | -0.0135                    | 0.0024      |
|                                                                                     | PST Women        | -0.0030                    | 0.0146      |
|                                                                                     | DMT Men          | -0.0039                    | 0.0133      |
|                                                                                     | PST Men          | -0.0162                    | 0.0017      |

Table 4

Table 5: Emotion Network Select Network Modularity Models to Hits

| Table 5                                                                   |                  |                            |             |
|---------------------------------------------------------------------------|------------------|----------------------------|-------------|
| Alternative Moderated Mediation Models; Select Network Modularity to Hits |                  |                            |             |
| <u>Model</u>                                                              | <u>Condition</u> | <u>Confidence Interval</u> |             |
|                                                                           |                  | <u>ULCI</u>                | <u>LLCI</u> |
| Select Network Modularity Hits to Negative Feedback Theta                 | Women DMT        | -0.0057                    | 0.0019      |
|                                                                           | Men DMT          | -0.0055                    | 0.0343      |
|                                                                           | Women PST        | -0.0015                    | 0.0221      |
| Select Network Modularity Hits to Negative Feedback Alpha                 | Men PST          | -0.0056                    | 0.0229      |
|                                                                           | Women DMT        | -0.0056                    | 0.0016      |
|                                                                           | Men DMT          | -0.0051                    | 0.0187      |
| Select Network Modularity Hits to Negative Feedback Beta                  | Women PST        | -0.0001                    | 0.0097      |
|                                                                           | Men PST          | -0.0170                    | 0.0032      |
|                                                                           | Women DMT        | -0.0047                    | 0.0032      |
| Select Network Modularity Hits to Negative Feedback Gamma                 | Men DMT          | -0.0104                    | 0.0066      |
|                                                                           | Women PST        | -0.0050                    | 0.0025      |
|                                                                           | Men PST          | -0.0151                    | 0.0042      |
| Select Network Modularity Hits to Positive Feedback Theta                 | Women DMT        | -0.0046                    | 0.0024      |
|                                                                           | Men DMT          | -0.0175                    | 0.0030      |
|                                                                           | Women PST        | -0.0018                    | 0.0182      |
| Select Network Modularity Hits to Positive Feedback Alpha                 | Men PST          | -0.0010                    | 0.0187      |
|                                                                           | Women DMT        | -0.0014                    | 0.0150      |
|                                                                           | Men DMT          | -0.0026                    | 0.0215      |
| Select Network Modularity Hits to Positive Feedback Beta                  | Women PST        | -0.0054                    | 0.0026      |
|                                                                           | Men PST          | -0.0034                    | 0.0199      |
|                                                                           | Women DMT        | -0.0035                    | 0.0122      |
| Select Network Modularity Hits to Positive Feedback Gamma                 | Men DMT          | -0.0122                    | 0.0039      |
|                                                                           | Women PST        | -0.0095                    | 0.0030      |
|                                                                           | Men PST          | -0.0109                    | 0.0141      |
| Select Network Modularity Hits to Positive Feedback Theta                 | Women DMT        | -0.0091                    | 0.0080      |
|                                                                           | Men DMT          | -0.0125                    | 0.0059      |
|                                                                           | Women PST        | -0.0072                    | 0.0017      |
| Select Network Modularity Hits to Positive Feedback Beta                  | Men PST          | -0.0092                    | 0.0172      |
|                                                                           | Women DMT        | -0.0050                    | 0.0061      |
|                                                                           | Men DMT          | -0.0042                    | 0.0180      |
| Select Network Modularity Hits to Positive Feedback Gamma                 | Women PST        | -0.0029                    | 0.0068      |
|                                                                           | Men PST          | -0.0230                    | 0.0003      |
|                                                                           |                  |                            |             |

Table 5



Table 6: Emotion Network Select Network Modularity Models to Misses

| Table 6                                                                     |                  |                            |             |
|-----------------------------------------------------------------------------|------------------|----------------------------|-------------|
| Alternative Moderated Mediation Models; Select Network Modularity to Misses |                  |                            |             |
| <u>Model</u>                                                                | <u>Condition</u> | <u>Confidence Interval</u> |             |
|                                                                             |                  | <u>ULCI</u>                | <u>LLCI</u> |
| Select Network Modularity Misses to Negative Feedback Theta                 | Women DMT        | -0.0015                    | 0.0025      |
|                                                                             | Men DMT          | -0.0083                    | 0.0052      |
|                                                                             | Women PST        | -0.0075                    | 0.0007      |
|                                                                             | Men PST          | -0.0030                    | 0.0097      |
| Select Network Modularity Misses to Negative Feedback Alpha                 | Women DMT        | -0.0008                    | 0.0045      |
|                                                                             | Men DMT          | -0.0128                    | 0.0013      |
|                                                                             | Women PST        | -0.0036                    | 0.0016      |
|                                                                             | Men PST          | -0.0077                    | 0.0015      |
| Select Network Modularity Misses to Negative Feedback Beta                  | Women DMT        | -0.0033                    | 0.0065      |
|                                                                             | Men DMT          | -0.0100                    | 0.0055      |
|                                                                             | Women PST        | -0.0023                    | 0.0020      |
|                                                                             | Men PST          | -0.0051                    | 0.0135      |
| Select Network Modularity Misses to Negative Feedback Gamma                 | Women DMT        | -0.0019                    | 0.0103      |
|                                                                             | Men DMT          | -0.0072                    | 0.0037      |
|                                                                             | Women PST        | -0.0104                    | 0.0007      |
|                                                                             | Men PST          | -0.0023                    | 0.0104      |
| Select Network Modularity Misses to Positive Feedback Theta                 | Women DMT        | -0.0027                    | 0.0078      |
|                                                                             | Men DMT          | -0.0081                    | 0.0035      |
|                                                                             | Women PST        | -0.0151                    | 0.0024      |
|                                                                             | Men PST          | -0.0103                    | 0.0035      |
| Select Network Modularity Misses to Positive Feedback Alpha                 | Women DMT        | -0.0071                    | 0.0034      |
|                                                                             | Men DMT          | -0.0042                    | 0.0077      |
|                                                                             | Women PST        | -0.0126                    | 0.0019      |
|                                                                             | Men PST          | -0.0055                    | 0.0135      |
| Select Network Modularity Misses to Positive Feedback Beta                  | Women DMT        | -0.0018                    | 0.0146      |
|                                                                             | Men DMT          | -0.0033                    | 0.0142      |
|                                                                             | Women PST        | -0.0115                    | 0.0038      |
|                                                                             | Men PST          | -0.0201                    | 0.0037      |
| Select Network Modularity Misses to Positive Feedback Gamma                 | Women DMT        | -0.0022                    | 0.0193      |
|                                                                             | Men DMT          | -0.0015                    | 0.0151      |
|                                                                             | Women PST        | -0.0148                    | 0.0042      |
|                                                                             | Men PST          | -0.0046                    | 0.0109      |

Table 6

Table 7: Emotion Network Select Network Modularity Models to False Alarms

| Table 7                                                                           |                  |                            |             |
|-----------------------------------------------------------------------------------|------------------|----------------------------|-------------|
| Alternative Moderated Mediation Models; Select Network Modularity to False Alarms |                  |                            |             |
| <u>Model</u>                                                                      | <u>Condition</u> | <u>Confidence Interval</u> |             |
|                                                                                   |                  | <u>ULCI</u>                | <u>LLCI</u> |
| Select Network Modularity False Alarms to Negative Feedback Theta                 | Women DMT        | -0.0059                    | 0.0070      |
|                                                                                   | Men DMT          | -0.0036                    | 0.0046      |
|                                                                                   | Women PST        | -0.0029                    | 0.0011      |
|                                                                                   | Men PST          | -0.0022                    | 0.0111      |
| Select Network Modularity False Alarms to Negative Feedback Alpha                 | Women DMT        | -0.0008                    | 0.0063      |
|                                                                                   | Men DMT          | -0.0038                    | 0.0142      |
|                                                                                   | Women PST        | -0.0062                    | 0.0013      |
|                                                                                   | Men PST          | -0.0083                    | 0.0024      |
| Select Network Modularity False Alarms to Negative Feedback Beta                  | Women DMT        | -0.0009                    | 0.0040      |
|                                                                                   | Men DMT          | -0.0024                    | 0.0061      |
|                                                                                   | Women PST        | -0.0080                    | 0.0020      |
|                                                                                   | Men PST          | -0.0025                    | 0.0059      |
| Select Network Modularity False Alarms to Negative Feedback Gamma                 | Women DMT        | -0.0018                    | 0.0096      |
|                                                                                   | Men DMT          | -0.0043                    | 0.0079      |
|                                                                                   | Women PST        | -0.0086                    | 0.0008      |
|                                                                                   | Men PST          | -0.0011                    | 0.0107      |
| Select Network Modularity False Alarms to Positive Feedback Theta                 | Women DMT        | -0.0073                    | 0.0055      |
|                                                                                   | Men DMT          | -0.0131                    | 0.0023      |
|                                                                                   | Women PST        | -0.0116                    | 0.0018      |
|                                                                                   | Men PST          | -0.0180                    | 0.0032      |
| Select Network Modularity False Alarms to Positive Feedback Alpha                 | Women DMT        | -0.0061                    | 0.0028      |
|                                                                                   | Men DMT          | -0.0056                    | 0.0096      |
|                                                                                   | Women PST        | -0.0067                    | 0.0069      |
|                                                                                   | Men PST          | -0.0130                    | 0.0022      |
| Select Network Modularity False Alarms to Positive Feedback Beta                  | Women DMT        | -0.0143                    | 0.0028      |
|                                                                                   | Men DMT          | -0.0076                    | 0.0018      |
|                                                                                   | Women PST        | -0.0106                    | 0.0041      |
|                                                                                   | Men PST          | -0.0031                    | 0.0095      |
| Select Network Modularity False Alarms to Positive Feedback Gamma                 | Women DMT        | -0.0018                    | 0.0112      |
|                                                                                   | Men DMT          | -0.0037                    | 0.0080      |
|                                                                                   | Women PST        | -0.0019                    | 0.0097      |
|                                                                                   | Men PST          | -0.0093                    | 0.0045      |

Table 7

Table 8: Emotion Network Select Network Modularity Models to Correct Rejections

| Table 8                                                                                 |           |                     |        |
|-----------------------------------------------------------------------------------------|-----------|---------------------|--------|
| Alternative Moderated Mediation Models; Select Network Modularity to Correct Rejections |           |                     |        |
| Model                                                                                   | Condition | Confidence Interval |        |
|                                                                                         |           | ULCI                | LLCI   |
| Select Network Modularity Correct Rejections to Negative Feedback Theta                 | Women DMT | -0.0018             | 0.0078 |
|                                                                                         | Men DMT   | -0.0032             | 0.0036 |
|                                                                                         | Women PST | -0.0040             | 0.0006 |
|                                                                                         | Men PST   | -0.0068             | 0.0038 |
| Select Network Modularity Correct Rejections to Negative Feedback Alpha                 | Women DMT | -0.0030             | 0.0011 |
|                                                                                         | Men DMT   | -0.0096             | 0.0032 |
|                                                                                         | Women PST | -0.0058             | 0.0011 |
|                                                                                         | Men PST   | -0.0062             | 0.0031 |
| Select Network Modularity Correct Rejections to Negative Feedback Beta                  | Women DMT | -0.0083             | 0.0014 |
|                                                                                         | Men DMT   | -0.0071             | 0.0018 |
|                                                                                         | Women PST | -0.0011             | 0.0018 |
|                                                                                         | Men PST   | -0.0029             | 0.0073 |
| Select Network Modularity Correct Rejections to Negative Feedback Gamma                 | Women DMT | -0.0009             | 0.0074 |
|                                                                                         | Men DMT   | -0.0090             | 0.0030 |
|                                                                                         | Women PST | -0.0013             | 0.0057 |
|                                                                                         | Men PST   | -0.0025             | 0.0074 |
| Select Network Modularity Correct Rejections to Positive Feedback Theta                 | Women DMT | -0.0008             | 0.0103 |
|                                                                                         | Men DMT   | -0.0128             | 0.0027 |
|                                                                                         | Women PST | -0.0028             | 0.0093 |
|                                                                                         | Men PST   | -0.0125             | 0.0062 |
| Select Network Modularity Correct Rejections to Positive Feedback Alpha                 | Women DMT | -0.0022             | 0.0072 |
|                                                                                         | Men DMT   | -0.0185             | 0.0074 |
|                                                                                         | Women PST | -0.0020             | 0.0144 |
|                                                                                         | Men PST   | -0.0021             | 0.0129 |
| Select Network Modularity Correct Rejections to Positive Feedback Beta                  | Women DMT | -0.0106             | 0.0042 |
|                                                                                         | Men DMT   | -0.0061             | 0.0072 |
|                                                                                         | Women PST | -0.0015             | 0.0186 |
|                                                                                         | Men PST   | -0.0026             | 0.0141 |
| Select Network Modularity Correct Rejections to Positive Feedback Gamma                 | Women DMT | -0.0075             | 0.0017 |
|                                                                                         | Men DMT   | -0.0064             | 0.0062 |
|                                                                                         | Women PST | -0.0066             | 0.0068 |
|                                                                                         | Men PST   | -0.0095             | 0.0033 |

Table 8

Table 9: Semantic Network Select Network Modularity to Hits

| Table 9                                                                           |                  |                            |             |
|-----------------------------------------------------------------------------------|------------------|----------------------------|-------------|
| Alternative Double Moderated Regression Models; Select Network Modularity to Hits |                  |                            |             |
| <u>Model</u>                                                                      | <u>Condition</u> | <u>Confidence Interval</u> |             |
|                                                                                   |                  | <u>ULCI</u>                | <u>LLCI</u> |
| Select Network Modularity Hits to Negative Feedback Theta                         | Women DMT        | -14.2883                   | 5.4455      |
|                                                                                   | Men DMT          | -7.5307                    | 15.4466     |
|                                                                                   | Women PST        | -2.0784                    | 14.3194     |
|                                                                                   | Men PST          | -8.3899                    | 8.1817      |
| Select Network Modularity Hits to Negative Feedback Alpha                         | Women DMT        | -11.1405                   | 3.7005      |
|                                                                                   | Men DMT          | -16.4205                   | 2.8767      |
|                                                                                   | Women PST        | -10.6132                   | 7.6259      |
|                                                                                   | Men PST          | -14.8229                   | 3.8063      |
| Select Network Modularity Hits to Negative Feedback Beta                          | Women DMT        | -6.5686                    | 9.0787      |
|                                                                                   | Men DMT          | -17.4906                   | 0.7872      |
|                                                                                   | Women PST        | -16.4543                   | 4.6619      |
|                                                                                   | Men PST          | 1.2088*                    | 26.5818*    |
| Select Network Modularity Hits to Negative Feedback Gamma                         | Women DMT        | -4.1167                    | 9.9238      |
|                                                                                   | Men DMT          | 2.1194*                    | 20.4652*    |
|                                                                                   | Women PST        | -5.0726                    | 11.8823     |
|                                                                                   | Men PST          | 3.5906*                    | 24.439*     |
| Select Network Modularity Hits to Positive Feedback Theta                         | Women DMT        | -29.5497                   | -0.0729     |
|                                                                                   | Men DMT          | -15.9958                   | 11.0712     |
|                                                                                   | Women PST        | -15.4193                   | 7.6872      |
|                                                                                   | Men PST          | -15.7641                   | 12.1283     |
| Select Network Modularity Hits to Positive Feedback Alpha                         | Women DMT        | -17.8520                   | 13.4857     |
|                                                                                   | Men DMT          | -7.7013                    | 21.1602     |
|                                                                                   | Women PST        | -12.1825                   | 14.0969     |
|                                                                                   | Men PST          | -12.9193                   | 13.5686     |
| Select Network Modularity Hits to Positive Feedback Beta                          | Women DMT        | -9.9361                    | 15.5536     |
|                                                                                   | Men DMT          | -24.2602                   | 12.3573     |
|                                                                                   | Women PST        | -16.9796                   | 10.9265     |
|                                                                                   | Men PST          | -25.4997                   | 1.6048      |
| Select Network Modularity Hits to Positive Feedback Gamma                         | Women DMT        | -13.4452                   | 9.0723      |
|                                                                                   | Men DMT          | -1.8431                    | 8.3554      |
|                                                                                   | Women PST        | -5.3130                    | 15.5245     |
|                                                                                   | Men PST          | -13.1352                   | 11.8113     |

Table 9

Table 10: Semantic Network Select Network Modularity to Misses

| Table 10                                                                            |           |                     |         |
|-------------------------------------------------------------------------------------|-----------|---------------------|---------|
| Alternative Double Moderated Regression Models; Select Network Modularity to Misses |           |                     |         |
| Model                                                                               | Condition | Confidence Interval |         |
|                                                                                     |           | ULCI                | LLCI    |
| Select Network Modularity Misses to Negative Feedback Theta                         | Women DMT | -8.4392             | 12.2229 |
|                                                                                     | Men DMT   | -15.3829            | 7.2831  |
|                                                                                     | Women PST | -9.6074             | 14.8708 |
|                                                                                     | Men PST   | -4.5360             | 20.7369 |
| Select Network Modularity Misses to Negative Feedback Alpha                         | Women DMT | -5.4693             | 10.9182 |
|                                                                                     | Men DMT   | -4.3952             | 11.4912 |
|                                                                                     | Women PST | -12.1587            | 6.6485  |
|                                                                                     | Men PST   | -8.3792             | 8.8178  |
| Select Network Modularity Misses to Negative Feedback Beta                          | Women DMT | -14.1711            | 4.1928  |
|                                                                                     | Men DMT   | -4.8412             | 17.3187 |
|                                                                                     | Women PST | -7.3231             | 9.8329  |
|                                                                                     | Men PST   | -3.4290             | 19.6348 |
| Select Network Modularity Misses to Negative Feedback Gamma                         | Women DMT | -5.2749             | 12.5883 |
|                                                                                     | Men DMT   | -6.3298             | 9.5828  |
|                                                                                     | Women PST | -5.6854             | 9.6254  |
|                                                                                     | Men PST   | -5.1987             | 15.5983 |
| Select Network Modularity Misses to Positive Feedback Theta                         | Women DMT | -19.5891            | 3.3619  |
|                                                                                     | Men DMT   | -14.7228            | 19.1071 |
|                                                                                     | Women PST | -18.6061            | 5.1949  |
|                                                                                     | Men PST   | -24.3497            | 6.2658  |
| Select Network Modularity Misses to Positive Feedback Alpha                         | Women DMT | -18.4038            | 3.7325  |
|                                                                                     | Men DMT   | -15.6131            | 10.7951 |
|                                                                                     | Women PST | -18.0912            | 5.9559  |
|                                                                                     | Men PST   | -12.4140            | 10.3350 |
| Select Network Modularity Misses to Positive Feedback Beta                          | Women DMT | -29.9184            | 0.3646  |
|                                                                                     | Men DMT   | -15.3992            | 19.1457 |
|                                                                                     | Women PST | -15.4737            | 8.9336  |
|                                                                                     | Men PST   | -20.8094            | 6.6011  |
| Select Network Modularity Misses to Positive Feedback Gamma                         | Women DMT | -12.7767            | 12.2528 |
|                                                                                     | Men DMT   | -7.5041             | 19.8560 |
|                                                                                     | Women PST | -8.9470             | 16.4066 |
|                                                                                     | Men PST   | -21.7113            | 3.2963  |

Table 10

Table 11: Semantic Network Select Network Modularity to False Alarms

| Table 11                                                                                  |           |                     |         |
|-------------------------------------------------------------------------------------------|-----------|---------------------|---------|
| Alternative Double Moderated Regression Models; Select Network Modularity to False Alarms |           |                     |         |
| Model                                                                                     | Condition | Confidence Interval |         |
|                                                                                           |           | ULCI                | LLCI    |
| Select Network Modularity False Alarms to Negative Feedback Theta                         | Women DMT | -12.6134            | 10.8488 |
|                                                                                           | Men DMT   | -8.5078             | 18.9524 |
|                                                                                           | Women PST | -12.2624            | 13.3041 |
|                                                                                           | Men PST   | -4.8651             | 17.7407 |
| Select Network Modularity False Alarms to Negative Feedback Alpha                         | Women DMT | -11.4091            | 9.3874  |
|                                                                                           | Men DMT   | -10.2924            | 14.7412 |
|                                                                                           | Women PST | -17.2366            | 9.7018  |
|                                                                                           | Men PST   | -9.0651             | 9.9800  |
| Select Network Modularity False Alarms to Negative Feedback Beta                          | Women DMT | -16.5171            | 9.0331  |
|                                                                                           | Men DMT   | -18.8698            | 10.0963 |
|                                                                                           | Women PST | -16.9957            | 8.2919  |
|                                                                                           | Men PST   | -14.3922            | 11.5951 |
| Select Network Modularity False Alarms to Negative Feedback Gamma                         | Women DMT | -8.7537             | 13.3704 |
|                                                                                           | Men DMT   | -11.3442            | 9.7533  |
|                                                                                           | Women PST | -5.8274             | 20.7656 |
|                                                                                           | Men PST   | -11.7092            | 15.7198 |
| Select Network Modularity False Alarms to Positive Feedback Theta                         | Women DMT | -20.6628            | 10.4956 |
|                                                                                           | Men DMT   | -7.6211             | 31.6678 |
|                                                                                           | Women PST | -14.5313            | 24.3721 |
|                                                                                           | Men PST   | -6.0931             | 39.9400 |
| Select Network Modularity False Alarms to Positive Feedback Alpha                         | Women DMT | -12.6022            | 16.9319 |
|                                                                                           | Men DMT   | -8.0540             | 23.1871 |
|                                                                                           | Women PST | -7.7181             | 23.3750 |
|                                                                                           | Men PST   | -24.3717            | 10.1236 |
| Select Network Modularity False Alarms to Positive Feedback Beta                          | Women DMT | -9.2573             | 16.2853 |
|                                                                                           | Men DMT   | -4.1566             | 30.3094 |
|                                                                                           | Women PST | -16.2846            | 15.2139 |
|                                                                                           | Men PST   | -17.3567            | 20.8988 |
| Select Network Modularity False Alarms to Positive Feedback Gamma                         | Women DMT | -26.8748            | 1.4568  |
|                                                                                           | Men DMT   | -5.5464             | 23.4649 |
|                                                                                           | Women PST | -6.8381             | 21.8869 |
|                                                                                           | Men PST   | -29.7375            | 9.1711  |

Table 11

Table 12: Semantic Network Select Network Modularity to Correct Rejections

| Table 12                                                                                        |           |                     |          |
|-------------------------------------------------------------------------------------------------|-----------|---------------------|----------|
| Alternative Double Moderated Regression Models; Select Network Modularity to Correct Rejections |           |                     |          |
| Model                                                                                           | Condition | Confidence Interval |          |
|                                                                                                 |           | ULCI                | LLCI     |
| Select Network Modularity Correct Rejections to Negative Feedback Theta                         | Women DMT | -22.1558            | 9.0038   |
|                                                                                                 | Men DMT   | 1.9267*             | 38.6388* |
|                                                                                                 | Women PST | -2.2926             | 26.1664  |
|                                                                                                 | Men PST   | -31.8418*           | -1.5535* |
| Select Network Modularity Correct Rejections to Negative Feedback Alpha                         | Women DMT | -7.7412             | 16.9680  |
|                                                                                                 | Men DMT   | -13.6793            | 21.4142  |
|                                                                                                 | Women PST | -23.6321            | 2.0398   |
|                                                                                                 | Men PST   | -6.7137             | 21.5752  |
| Select Network Modularity Correct Rejections to Negative Feedback Beta                          | Women DMT | -12.3130            | 13.7748  |
|                                                                                                 | Men DMT   | -20.6597            | 9.3812   |
|                                                                                                 | Women PST | -19.4365            | 8.8101   |
|                                                                                                 | Men PST   | -26.2363            | 6.8995   |
| Select Network Modularity Correct Rejections to Negative Feedback Gamma                         | Women DMT | -4.7837             | 18.6214  |
|                                                                                                 | Men DMT   | 1.9509*             | 31.2381* |
|                                                                                                 | Women PST | -26.5274            | 9.9311   |
|                                                                                                 | Men PST   | -9.5068             | 18.0344  |
| Select Network Modularity Correct Rejections to Positive Feedback Theta                         | Women DMT | -25.3244            | 17.2458  |
|                                                                                                 | Men DMT   | -35.8505            | 12.2377  |
|                                                                                                 | Women PST | -30.4110            | 18.3309  |
|                                                                                                 | Men PST   | -14.9126            | 30.0530  |
| Select Network Modularity Correct Rejections to Positive Feedback Alpha                         | Women DMT | -36.8257*           | -0.549*  |
|                                                                                                 | Men DMT   | -32.7861            | 21.9207  |
|                                                                                                 | Women PST | -15.8857            | 26.2316  |
|                                                                                                 | Men PST   | -13.6207            | 20.4396  |
| Select Network Modularity Correct Rejections to Positive Feedback Beta                          | Women DMT | -32.8425            | -0.6511  |
|                                                                                                 | Men DMT   | -24.9800            | 13.5839  |
|                                                                                                 | Women PST | -18.5460            | 25.0900  |
|                                                                                                 | Men PST   | -30.6523            | 6.7755   |
| Select Network Modularity Correct Rejections to Positive Feedback Gamma                         | Women DMT | -35.9866*           | -3.4139* |
|                                                                                                 | Men DMT   | -24.1781            | 13.1457  |
|                                                                                                 | Women PST | -35.4937            | 11.8164  |
|                                                                                                 | Men PST   | -19.0902            | 18.1810  |

Table 12

Table 13: Semantic Network Subnetwork Modularity to Hits

| Table 13                                                                      |                  |                            |             |  |
|-------------------------------------------------------------------------------|------------------|----------------------------|-------------|--|
| Alternative Double Moderated Regression Models; Subnetwork Modularity to Hits |                  |                            |             |  |
| <u>Model</u>                                                                  | <u>Condition</u> | <u>Confidence Interval</u> |             |  |
|                                                                               |                  | <u>LLCI</u>                | <u>ULCI</u> |  |
| Subnetwork Modularity Hits to Negative Feedback Theta                         | Women DMT        | -6.3716                    | 5.1265      |  |
|                                                                               | Men DMT          | -5.3975                    | 6.4850      |  |
|                                                                               | Women PST        | -8.7110                    | 5.0713      |  |
|                                                                               | Men PST          | -7.9153                    | 9.3485      |  |
| Subnetwork Modularity Hits to Negative Feedback Alpha                         | Women DMT        | -5.2243                    | 6.0049      |  |
|                                                                               | Men DMT          | -13.9500                   | -2.4456     |  |
|                                                                               | Women PST        | -7.2248                    | 4.1988      |  |
|                                                                               | Men PST          | -6.5925                    | 7.3805      |  |
| Subnetwork Modularity Hits to Negative Feedback Beta                          | Women DMT        | -5.3922                    | 7.4228      |  |
|                                                                               | Men DMT          | -11.8255                   | 5.0830      |  |
|                                                                               | Women PST        | -5.5426                    | 9.8734      |  |
|                                                                               | Men PST          | -7.1868                    | 14.4486     |  |
| Subnetwork Modularity Hits to Negative Feedback Gamma                         | Women DMT        | -7.5877                    | 2.4286      |  |
|                                                                               | Men DMT          | -11.2418                   | 0.6720      |  |
|                                                                               | Women PST        | -7.2848                    | 4.4160      |  |
|                                                                               | Men PST          | -0.2927                    | 12.9439     |  |
| Subnetwork Modularity Hits to Positive Feedback Theta                         | Women DMT        | -7.9711                    | 9.5184      |  |
|                                                                               | Men DMT          | -5.1916                    | 12.0532     |  |
|                                                                               | Women PST        | -18.3065                   | 6.6701      |  |
|                                                                               | Men PST          | -8.2509                    | 6.5940      |  |
| Subnetwork Modularity Hits to Positive Feedback Alpha                         | Women DMT        | -2.6738                    | 13.4870     |  |
|                                                                               | Men DMT          | -6.3793                    | 8.2535      |  |
|                                                                               | Women PST        | -15.8333                   | 1.5031      |  |
|                                                                               | Men PST          | -2.9517                    | 19.0327     |  |
| Subnetwork Modularity Hits to Positive Feedback Beta                          | Women DMT        | -17.2725                   | 6.0240      |  |
|                                                                               | Men DMT          | -5.9280                    | 13.5870     |  |
|                                                                               | Women PST        | -15.7049                   | 8.3820      |  |
|                                                                               | Men PST          | -3.3774                    | 16.3928     |  |
| Subnetwork Modularity Hits to Positive Feedback Gamma                         | Women DMT        | -9.9047                    | 4.3717      |  |
|                                                                               | Men DMT          | -15.1133                   | 11.9345     |  |
|                                                                               | Women PST        | -4.8000                    | 10.2533     |  |
|                                                                               | Men PST          | -8.1631                    | 5.7296      |  |

Table 13



Table 14: Semantic Network Subnetwork Modularity to Misses

| Table 14                                                                        |           |                     |         |
|---------------------------------------------------------------------------------|-----------|---------------------|---------|
| Alternative Double Moderated Regression Models: Subnetwork Modularity to Misses |           |                     |         |
| Model                                                                           | Condition | Confidence Interval |         |
|                                                                                 |           | LLCI                | ULCI    |
| Subnetwork Modularity Misses to Negative Feedback Theta                         | Women DMT | -6.8230             | 2.6006  |
|                                                                                 | Men DMT   | -10.5500            | 1.7259  |
|                                                                                 | Women PST | -6.8534             | 8.8284  |
|                                                                                 | Men PST   | -12.1430            | 6.5560  |
| Subnetwork Modularity Misses to Negative Feedback Alpha                         | Women DMT | -2.2644             | 7.2102  |
|                                                                                 | Men DMT   | -6.9322             | 4.5318  |
|                                                                                 | Women PST | -5.1744             | 8.5250  |
|                                                                                 | Men PST   | -9.0407             | 2.0515  |
| Subnetwork Modularity Misses to Negative Feedback Beta                          | Women DMT | -8.0008             | 4.0169  |
|                                                                                 | Men DMT   | -2.6912             | 10.7960 |
|                                                                                 | Women PST | -14.0301            | 6.1583  |
|                                                                                 | Men PST   | -12.7552            | 8.2365  |
| Subnetwork Modularity Misses to Negative Feedback Gamma                         | Women DMT | -3.7283             | 7.2738  |
|                                                                                 | Men DMT   | -8.9423             | 5.7733  |
|                                                                                 | Women PST | -6.3061             | 4.8755  |
|                                                                                 | Men PST   | -4.1887             | 8.9112  |
| Subnetwork Modularity Misses to Positive Feedback Theta                         | Women DMT | -14.0031            | 2.7666  |
|                                                                                 | Men DMT   | -8.9122             | 7.3703  |
|                                                                                 | Women PST | -17.6927            | 2.6746  |
|                                                                                 | Men PST   | -10.0732            | 18.8749 |
| Subnetwork Modularity Misses to Positive Feedback Alpha                         | Women DMT | -8.0887             | 6.2589  |
|                                                                                 | Men DMT   | -14.8187            | 4.8387  |
|                                                                                 | Women PST | -9.7427             | 6.7587  |
|                                                                                 | Men PST   | -11.4996            | 6.1653  |
| Subnetwork Modularity Misses to Positive Feedback Beta                          | Women DMT | -16.7341            | 7.3037  |
|                                                                                 | Men DMT   | -3.8453             | 14.3303 |
|                                                                                 | Women PST | -17.4313            | 8.4969  |
|                                                                                 | Men PST   | -14.2974            | 2.6241  |
| Subnetwork Modularity Misses to Positive Feedback Gamma                         | Women DMT | -12.5528            | 2.8788  |
|                                                                                 | Men DMT   | -21.1265            | -2.1786 |
|                                                                                 | Women PST | -15.2843            | 5.6929  |
|                                                                                 | Men PST   | -5.6257             | 6.8540  |

Table 14

Table 15: Semantic Network Subnetwork Modularity to False Alarms

| Table 15                                                                              |                  |                            |             |
|---------------------------------------------------------------------------------------|------------------|----------------------------|-------------|
| Alternative Double Moderated Regression Models; Subnetwork Modularity to False Alarms |                  |                            |             |
| <u>Model</u>                                                                          | <u>Condition</u> | <u>Confidence Interval</u> |             |
|                                                                                       |                  | <u>LLCI</u>                | <u>ULCI</u> |
| Subnetwork Modularity False Alarms to Negative Feedback Theta                         | Women DMT        | -6.2274                    | 7.1212      |
|                                                                                       | Men DMT          | -8.8003                    | 6.4531      |
|                                                                                       | Women PST        | -9.1232                    | 5.1347      |
|                                                                                       | Men PST          | -10.9746                   | 7.9607      |
| Subnetwork Modularity False Alarms to Negative Feedback Alpha                         | Women DMT        | -5.7169                    | 1.4288      |
|                                                                                       | Men DMT          | -3.6403                    | 3.2565      |
|                                                                                       | Women PST        | -5.0941                    | 4.5415      |
|                                                                                       | Men PST          | -2.0477                    | 8.4190      |
| Subnetwork Modularity False Alarms to Negative Feedback Beta                          | Women DMT        | -7.9162                    | 0.8794      |
|                                                                                       | Men DMT          | -2.7451                    | 6.0033      |
|                                                                                       | Women PST        | -6.8066                    | 2.7697      |
|                                                                                       | Men PST          | -6.8885                    | 4.3731      |
| Subnetwork Modularity False Alarms to Negative Feedback Gamma                         | Women DMT        | -5.7808                    | 1.3426      |
|                                                                                       | Men DMT          | -4.2351                    | 3.3767      |
|                                                                                       | Women PST        | -3.9845                    | 4.3511      |
|                                                                                       | Men PST          | -0.6067                    | 7.1643      |
| Subnetwork Modularity False Alarms to Positive Feedback Theta                         | Women DMT        | -11.2026                   | 12.8838     |
|                                                                                       | Men DMT          | -4.2837                    | 13.0459     |
|                                                                                       | Women PST        | -9.5199                    | 16.0269     |
|                                                                                       | Men PST          | -8.5546                    | 13.5455     |
| Subnetwork Modularity False Alarms to Positive Feedback Alpha                         | Women DMT        | -9.6569                    | 0.8968      |
|                                                                                       | Men DMT          | -6.1203                    | 5.8407      |
|                                                                                       | Women PST        | -7.9862                    | 4.2683      |
|                                                                                       | Men PST          | -8.7920                    | 2.4722      |
| Subnetwork Modularity False Alarms to Positive Feedback Beta                          | Women DMT        | -11.4177                   | -0.3092     |
|                                                                                       | Men DMT          | -7.8626                    | 4.6084      |
|                                                                                       | Women PST        | -10.4519                   | -0.0973     |
|                                                                                       | Men PST          | -10.8218                   | 2.5736      |
| Subnetwork Modularity False Alarms to Positive Feedback Gamma                         | Women DMT        | -10.4653                   | 0.8612      |
|                                                                                       | Men DMT          | -1.4330                    | 8.8854      |
|                                                                                       | Women PST        | -13.9729                   | -1.1029     |
|                                                                                       | Men PST          | -9.6266                    | 1.7684      |

Table 15

Table 16: Semantic Network Subnetwork Modularity to Correct Rejections

| Table 16                                                                                    |                  |                            |             |  |
|---------------------------------------------------------------------------------------------|------------------|----------------------------|-------------|--|
| Alternative Double Moderated Regression Models; Subnetwork Modularity to Correct Rejections |                  |                            |             |  |
| <u>Model</u>                                                                                | <u>Condition</u> | <u>Confidence Interval</u> |             |  |
|                                                                                             |                  | <u>LLCI</u>                | <u>ULCI</u> |  |
| Subnetwork Modularity Correct Rejections to Negative Feedback Theta                         | Women DMT        | -9.9158                    | 5.2754      |  |
|                                                                                             | Men DMT          | -21.4961                   | 11.1414     |  |
|                                                                                             | Women PST        | -8.5009                    | 4.3212      |  |
|                                                                                             | Men PST          | -13.7716                   | 8.6908      |  |
| Subnetwork Modularity Correct Rejections to Negative Feedback Alpha                         | Women DMT        | -4.1581                    | 3.0942      |  |
|                                                                                             | Men DMT          | -3.9781                    | 2.2703      |  |
|                                                                                             | Women PST        | -2.6894                    | 5.0933      |  |
|                                                                                             | Men PST          | -5.0240                    | 1.4509      |  |
| Subnetwork Modularity Correct Rejections to Negative Feedback Beta                          | Women DMT        | -2.3862                    | 4.4668      |  |
|                                                                                             | Men DMT          | -2.7964                    | 4.7534      |  |
|                                                                                             | Women PST        | -4.0228                    | 3.1896      |  |
|                                                                                             | Men PST          | -6.9816                    | 1.9197      |  |
| Subnetwork Modularity Correct Rejections to Negative Feedback Gamma                         | Women DMT        | -4.7868                    | 2.8049      |  |
|                                                                                             | Men DMT          | -3.1606                    | 3.5090      |  |
|                                                                                             | Women PST        | -2.9862                    | 4.3984      |  |
|                                                                                             | Men PST          | -8.3393                    | 0.4660      |  |
| Subnetwork Modularity Correct Rejections to Positive Feedback Theta                         | Women DMT        | -9.7675                    | 6.9857      |  |
|                                                                                             | Men DMT          | -18.6058                   | 6.1383      |  |
|                                                                                             | Women PST        | -20.6655                   | 7.3160      |  |
|                                                                                             | Men PST          | -6.1777                    | 19.4076     |  |
| Subnetwork Modularity Correct Rejections to Positive Feedback Alpha                         | Women DMT        | -0.2562                    | 8.2972      |  |
|                                                                                             | Men DMT          | -0.2395                    | 7.6377      |  |
|                                                                                             | Women PST        | -7.2975                    | 4.4277      |  |
|                                                                                             | Men PST          | -5.2459                    | 7.1299      |  |
| Subnetwork Modularity Correct Rejections to Positive Feedback Beta                          | Women DMT        | 3.4725                     | 12.6631     |  |
|                                                                                             | Men DMT          | -1.1551                    | 8.3569      |  |
|                                                                                             | Women PST        | -2.9719                    | 8.5737      |  |
|                                                                                             | Men PST          | -0.0746                    | 15.3916     |  |
| Subnetwork Modularity Correct Rejections to Positive Feedback Gamma                         | Women DMT        | -0.3396                    | 8.6440      |  |
|                                                                                             | Men DMT          | -1.4904                    | 7.5008      |  |
|                                                                                             | Women PST        | -5.6846                    | 5.2253      |  |
|                                                                                             | Men PST          | -5.6992                    | 6.2852      |  |

Table 17: Semantic memory connectivity to negative feedback predicts performance

| Table 17                                                               |           |       |      |                      |          |
|------------------------------------------------------------------------|-----------|-------|------|----------------------|----------|
| Semantic Memory Connectivity to Negative Feedback Predicts Performance |           |       |      |                      |          |
| Variable                                                               | Condition | Beta  | p    | Confidence Intervals |          |
|                                                                        |           |       |      | LLCI                 | ULCI     |
| Subnetwork Modularity                                                  | Women DMT | -0.33 | 0.84 | -3.4998              | 2.8401   |
| Theta Negative Feedback                                                | Men DMT   | 3.50  | 0.04 | 0.1281*              | 6.868*   |
|                                                                        | Women PST | 1.25  | 0.40 | -1.6913              | 4.1959   |
|                                                                        | Men PST   | 5.08  | 0.01 | 10.3498*             | 8.8035*  |
| Subnetwork Modularity                                                  | Women DMT | -1.40 | 0.14 | -3.2541              | 0.4522   |
| Alpha Negative Feedback                                                | Men DMT   | -0.87 | 0.43 | -3.0204              | 1.2885   |
|                                                                        | Women PST | -0.82 | 0.39 | -2.7143              | 1.0758   |
|                                                                        | Men PST   | -0.28 | 0.80 | -2.4754              | 1.9069   |
| Subnetwork Modularity                                                  | Women DMT | -1.09 | 0.36 | -3.4522              | 1.2635   |
| Beta Negative Feedback                                                 | Men DMT   | -1.51 | 0.25 | -4.1247              | 1.1000   |
|                                                                        | Women PST | -0.95 | 0.36 | -2.9791              | 1.0847   |
|                                                                        | Men PST   | -1.37 | 0.31 | -4.0132              | 1.2827   |
| Subnetwork Modularity                                                  | Women DMT | 0.60  | 0.57 | -1.5001              | 2.6916   |
| Gamma Negative Feedback                                                | Men DMT   | -0.33 | 0.80 | -2.9276              | 2.2629   |
|                                                                        | Women PST | 0.90  | 0.38 | -1.1024              | 2.8956   |
|                                                                        | Men PST   | -0.03 | 0.98 | -2.4792              | 2.4162   |
| Select Network Modularity                                              | Women DMT | -3.97 | 0.05 | -7.8572*             | -0.0846* |
| Theta Negative Feedback                                                | Men DMT   | -2.13 | 0.35 | -6.6391              | 2.3809   |
|                                                                        | Women PST | -2.25 | 0.37 | -7.1771              | 2.6770   |
|                                                                        | Men PST   | -0.41 | 0.86 | -5.1278              | 4.3113   |
| Select Network Modularity                                              | Women DMT | 1.97  | 0.33 | -1.9904              | 5.9299   |
| Alpha Negative Feedback                                                | Men DMT   | -0.23 | 0.92 | -5.0901              | 4.6259   |
|                                                                        | Women PST | 2.13  | 0.40 | -2.8686              | 7.1202   |
|                                                                        | Men PST   | -0.08 | 0.98 | -4.9907              | 4.8386   |
| Select Network Modularity                                              | Women DMT | -2.40 | 0.34 | -7.3362              | 2.5344   |
| Beta Negative Feedback                                                 | Men DMT   | 1.33  | 0.62 | -3.8977              | 6.5542   |
|                                                                        | Women PST | -1.79 | 0.47 | -6.7079              | 3.1312   |
|                                                                        | Men PST   | 1.94  | 0.49 | -3.5638              | 7.4454   |
| Select Network Modularity                                              | Women DMT | -0.99 | 0.67 | -5.5305              | 3.5451   |
| Gamma Negative Feedback                                                | Men DMT   | -2.25 | 0.31 | -6.5707              | 2.0749   |
|                                                                        | Women PST | -0.25 | 0.91 | -4.6455              | 4.1437   |
|                                                                        | Men PST   | -1.51 | 0.53 | -6.1822              | 3.1700   |

Table 17

Table 18: Semantic memory connectivity to positive feedback predicts performance

Table 18

## Semantic Memory Connectivity to Positive Feedback Predicts Performance

| Variable                                             | Condition | Beta  | p    | Confidence Intervals |          |
|------------------------------------------------------|-----------|-------|------|----------------------|----------|
|                                                      |           |       |      | LLCI                 | ULCI     |
| Subnetwork Modularity Theta<br>Positive Feedback     | Women DMT | -0.45 | 0.79 | -3.7264              | 2.8333   |
|                                                      | Men DMT   | -1.79 | 0.29 | -5.1239              | 1.5390   |
|                                                      | Women PST | -0.88 | 0.60 | -4.1763              | 2.4262   |
|                                                      | Men PST   | -2.22 | 0.22 | -5.7467              | 1.3048   |
| Subnetwork Modularity Alpha<br>Positive Feedback     | Women DMT | 0.84  | 0.46 | -1.3848              | 3.0708   |
|                                                      | Men DMT   | 0.58  | 0.62 | -1.7141              | 2.8742   |
|                                                      | Women PST | 0.54  | 0.65 | -1.8022              | 2.8890   |
|                                                      | Men PST   | 0.28  | 0.78 | -1.6679              | 2.2288   |
| Subnetwork Modularity Beta<br>Positive Feedback      | Women DMT | 0.48  | 0.71 | -2.0719              | 3.0361   |
|                                                      | Men DMT   | 1.25  | 0.36 | -1.4459              | 3.9380   |
|                                                      | Women PST | 0.27  | 0.84 | -2.4000              | 2.9454   |
|                                                      | Men PST   | 1.04  | 0.45 | -1.6512              | 3.7246   |
| Subnetwork Modularity Gamma<br>Positive Feedback     | Women DMT | 0.48  | 0.61 | -1.4078              | 2.3720   |
|                                                      | Men DMT   | 0.93  | 0.43 | -1.3644              | 3.2188   |
|                                                      | Women PST | -0.08 | 0.95 | -2.5533              | 2.3912   |
|                                                      | Men PST   | 0.36  | 0.74 | -1.8000              | 2.5281   |
| Select Network Modularity Theta<br>Positive Feedback | Women DMT | -2.04 | 0.27 | -5.6732              | 1.5870   |
|                                                      | Men DMT   | -0.90 | 0.74 | -6.1497              | 4.3586   |
|                                                      | Women PST | 1.04  | 0.61 | -2.9682              | 5.0508   |
|                                                      | Men PST   | 2.19  | 0.43 | -3.3221              | 7.6997   |
| Select Network Modularity Alpha<br>Positive Feedback | Women DMT | -2.33 | 0.32 | -6.9609              | 2.3012   |
|                                                      | Men DMT   | 1.27  | 0.64 | -4.0470              | 6.5834   |
|                                                      | Women PST | -3.17 | 0.18 | -7.8596              | 1.5247   |
|                                                      | Men PST   | 0.43  | 0.85 | -4.1987              | 5.0600   |
| Select Network Modularity Beta<br>Positive Feedback  | Women DMT | -5.87 | 0.00 | -9.5849*             | -2.1471* |
|                                                      | Men DMT   | -1.30 | 0.62 | -6.4508              | 3.8546   |
|                                                      | Women PST | -0.30 | 0.89 | -4.6890              | 4.0825   |
|                                                      | Men PST   | 4.26  | 0.10 | -0.8021              | 9.3313   |
| Select Network Modularity Gamma<br>Positive Feedback | Women DMT | -1.93 | 0.39 | -6.3045              | 2.4491   |
|                                                      | Men DMT   | -0.08 | 0.97 | -4.9205              | 4.7659   |
|                                                      | Women PST | -0.23 | 0.92 | -4.5639              | 4.1073   |
|                                                      | Men PST   | 1.62  | 0.47 | -2.7913              | 6.0356   |

Table 18

Supplementary Descriptive Statistics:

Table 19: Semantic Memory Subnetwork Modularity to Negative Misses

| Table 19                                                                                    |                                                                                             |        |        |        |        |    |
|---------------------------------------------------------------------------------------------|---------------------------------------------------------------------------------------------|--------|--------|--------|--------|----|
| Semantic Network Subnetwork Modularity to Negative Misses                                   |                                                                                             |        |        |        |        |    |
| Variable                                                                                    | Condition                                                                                   | Gender | Mean   | SD     | N      |    |
| Semantic Network Subnetwork<br>Modularity in the Theta Frequency Band<br>to Negative Misses | DMT                                                                                         | Female | 0.0982 | 0.0125 | 48     |    |
|                                                                                             |                                                                                             | Male   | 0.0958 | 0.0115 | 33     |    |
|                                                                                             |                                                                                             | Total  | 0.0972 | 0.0121 | 81     |    |
|                                                                                             | PST                                                                                         | Female | 0.0968 | 0.0089 | 35     |    |
|                                                                                             |                                                                                             | Male   | 0.0968 | 0.0091 | 32     |    |
|                                                                                             |                                                                                             | Total  | 0.0968 | 0.0090 | 67     |    |
|                                                                                             | Total                                                                                       | Female | 0.0976 | 0.1111 | 83     |    |
|                                                                                             |                                                                                             | Male   | 0.0963 | 0.0104 | 65     |    |
|                                                                                             |                                                                                             | Total  | 0.0971 | 0.0108 | 148    |    |
|                                                                                             | Semantic Network Subnetwork<br>Modularity in the Alpha Frequency Band<br>to Negative Misses | DMT    | Female | 0.1043 | 0.0120 | 48 |
|                                                                                             |                                                                                             |        | Male   | 0.1020 | 0.0135 | 33 |
|                                                                                             |                                                                                             |        | Total  | 0.1034 | 0.0126 | 81 |
| PST                                                                                         |                                                                                             | Female | 0.1030 | 0.0113 | 35     |    |
|                                                                                             |                                                                                             | Male   | 0.1040 | 0.0138 | 32     |    |
|                                                                                             |                                                                                             | Total  | 0.1034 | 0.0125 | 67     |    |
| Total                                                                                       |                                                                                             | Female | 0.1037 | 0.1167 | 83     |    |
|                                                                                             |                                                                                             | Male   | 0.1030 | 0.0136 | 65     |    |
|                                                                                             |                                                                                             | Total  | 0.1034 | 0.0125 | 148    |    |
| Semantic Network Subnetwork<br>Modularity in the Beta Frequency Band<br>to Negative Misses  |                                                                                             | DMT    | Female | 0.1014 | 0.0101 | 48 |
|                                                                                             |                                                                                             |        | Male   | 0.1012 | 0.0104 | 33 |
|                                                                                             |                                                                                             |        | Total  | 0.1013 | 0.0102 | 81 |
|                                                                                             | PST                                                                                         | Female | 0.1016 | 0.0070 | 35     |    |
|                                                                                             |                                                                                             | Male   | 0.1008 | 0.0072 | 32     |    |
|                                                                                             |                                                                                             | Total  | 0.1012 | 0.0071 | 67     |    |
|                                                                                             | Total                                                                                       | Female | 0.1015 | 0.0089 | 83     |    |
|                                                                                             |                                                                                             | Male   | 0.1010 | 0.0089 | 65     |    |
|                                                                                             |                                                                                             | Total  | 0.1013 | 0.0089 | 148    |    |
|                                                                                             | Semantic Network Subnetwork<br>Modularity in the Gamma Frequency Band<br>to Negative Misses | DMT    | Female | 0.1021 | 0.0103 | 48 |
|                                                                                             |                                                                                             |        | Male   | 0.1052 | 0.0110 | 33 |
|                                                                                             |                                                                                             |        | Total  | 0.1034 | 0.0106 | 81 |
| PST                                                                                         |                                                                                             | Female | 0.0994 | 0.0128 | 35     |    |
|                                                                                             |                                                                                             | Male   | 0.0971 | 0.0116 | 32     |    |
|                                                                                             |                                                                                             | Total  | 0.0983 | 0.0122 | 67     |    |
| Total                                                                                       |                                                                                             | Female | 0.1010 | 0.0115 | 83     |    |
|                                                                                             |                                                                                             | Male   | 0.1012 | 0.0119 | 65     |    |
|                                                                                             |                                                                                             | Total  | 0.1011 | 0.0116 | 148    |    |

Table 20: Semantic Memory Select Network Modularity to Negative Misses

| Table 20                                                                                  |                                                                                           |        |         |         |        |    |
|-------------------------------------------------------------------------------------------|-------------------------------------------------------------------------------------------|--------|---------|---------|--------|----|
| Semantic Network Select Network Modularity to Negative Misses                             |                                                                                           |        |         |         |        |    |
| Variable                                                                                  | Condition                                                                                 | Gender | Mean    | SD      | N      |    |
| Semantic Network Select Network Modularity in the Theta Frequency Band to Negative Misses | DMT                                                                                       | Female | -0.0074 | 0.0066  | 48     |    |
|                                                                                           |                                                                                           | Male   | -0.0084 | 0.0066  | 33     |    |
|                                                                                           |                                                                                           | Total  | -0.0078 | 0.0066  | 81     |    |
|                                                                                           | PST                                                                                       | Female | -0.0051 | 0.0057  | 35     |    |
|                                                                                           |                                                                                           | Male   | -0.0090 | 0.0058  | 32     |    |
|                                                                                           |                                                                                           | Total  | -0.0070 | 0.0061  | 67     |    |
|                                                                                           | Total                                                                                     | Female | -0.0065 | 0.0063  | 83     |    |
|                                                                                           |                                                                                           | Male   | -0.0087 | 0.0062  | 65     |    |
|                                                                                           |                                                                                           | Total  | -0.0074 | 0.0063  | 148    |    |
|                                                                                           | Semantic Network Select Network Modularity in the Alpha Frequency Band to Negative Misses | DMT    | Female  | -0.0050 | 0.0076 | 48 |
|                                                                                           |                                                                                           |        | Male    | -0.0071 | 0.0094 | 33 |
|                                                                                           |                                                                                           |        | Total   | -0.0059 | 0.0084 | 81 |
| PST                                                                                       |                                                                                           | Female | -0.0062 | 0.0072  | 35     |    |
|                                                                                           |                                                                                           | Male   | -0.0042 | 0.0085  | 32     |    |
|                                                                                           |                                                                                           | Total  | -0.0053 | 0.0078  | 67     |    |
| Total                                                                                     |                                                                                           | Female | -0.0055 | 0.0074  | 83     |    |
|                                                                                           |                                                                                           | Male   | -0.0057 | 0.0090  | 65     |    |
|                                                                                           |                                                                                           | Total  | -0.0056 | 0.0081  | 148    |    |
| Semantic Network Select Network Modularity in the Beta Frequency Band to Negative Misses  |                                                                                           | DMT    | Female  | -0.0051 | 0.0064 | 48 |
|                                                                                           |                                                                                           |        | Male    | -0.0046 | 0.0070 | 33 |
|                                                                                           |                                                                                           |        | Total   | -0.0049 | 0.0066 | 81 |
|                                                                                           | PST                                                                                       | Female | -0.0054 | 0.0079  | 35     |    |
|                                                                                           |                                                                                           | Male   | -0.0074 | 0.0069  | 32     |    |
|                                                                                           |                                                                                           | Total  | -0.0063 | 0.0075  | 67     |    |
|                                                                                           | Total                                                                                     | Female | -0.0052 | 0.0070  | 83     |    |
|                                                                                           |                                                                                           | Male   | -0.0060 | 0.0070  | 65     |    |
|                                                                                           |                                                                                           | Total  | -0.0056 | 0.0070  | 148    |    |
|                                                                                           | Semantic Network Select Network Modularity in the Gamma Frequency Band to Negative Misses | DMT    | Female  | -0.0061 | 0.0069 | 48 |
|                                                                                           |                                                                                           |        | Male    | -0.0059 | 0.0087 | 33 |
|                                                                                           |                                                                                           |        | Total   | -0.0060 | 0.0076 | 81 |
| PST                                                                                       |                                                                                           | Female | -0.0048 | 0.0092  | 35     |    |
|                                                                                           |                                                                                           | Male   | -0.0064 | 0.0072  | 32     |    |
|                                                                                           |                                                                                           | Total  | -0.0056 | 0.0083  | 67     |    |
| Total                                                                                     |                                                                                           | Female | -0.0056 | 0.0079  | 83     |    |
|                                                                                           |                                                                                           | Male   | -0.0062 | 0.0079  | 65     |    |
|                                                                                           |                                                                                           | Total  | -0.0058 | 0.0079  | 148    |    |

Table 20

Table 21: Semantic Memory Subnetwork Modularity to Negative False Alarms:

| Table 21                                                                                          |                                                                                                      |        |        |        |        |    |
|---------------------------------------------------------------------------------------------------|------------------------------------------------------------------------------------------------------|--------|--------|--------|--------|----|
| Semantic Network Subnetwork Modularity to Negative False Alarms                                   |                                                                                                      |        |        |        |        |    |
| Variable                                                                                          | Condition                                                                                            | Gender | Mean   | SD     | N      |    |
| Semantic Network Subnetwork<br>Modularity in the Theta Frequency<br>Band to Negative False Alarms | DMT                                                                                                  | Female | 0.0946 | 0.0086 | 49     |    |
|                                                                                                   |                                                                                                      | Male   | 0.0961 | 0.0102 | 37     |    |
|                                                                                                   |                                                                                                      | Total  | 0.0953 | 0.0093 | 86     |    |
|                                                                                                   | PST                                                                                                  | Female | 0.9577 | 0.0090 | 38     |    |
|                                                                                                   |                                                                                                      | Male   | 0.0950 | 0.0073 | 36     |    |
|                                                                                                   |                                                                                                      | Total  | 0.9542 | 0.0081 | 74     |    |
|                                                                                                   | Total                                                                                                | Female | 0.0951 | 0.0087 | 87     |    |
|                                                                                                   |                                                                                                      | Male   | 0.0956 | 0.0088 | 73     |    |
|                                                                                                   |                                                                                                      | Total  | 0.0953 | 0.0087 | 160    |    |
|                                                                                                   | Semantic Network Subnetwork<br>Modularity in the Alpha Frequency<br>Band to Negative False Alarms    | DMT    | Female | 0.1098 | 0.0156 | 49 |
| Male                                                                                              |                                                                                                      |        | 0.1116 | 0.0186 | 37     |    |
| Total                                                                                             |                                                                                                      |        | 0.1106 | 0.0169 | 86     |    |
| PST                                                                                               |                                                                                                      | Female | 0.1112 | 0.0145 | 38     |    |
|                                                                                                   |                                                                                                      | Male   | 0.1070 | 0.0129 | 36     |    |
|                                                                                                   |                                                                                                      | Total  | 0.1091 | 0.0138 | 74     |    |
| Total                                                                                             |                                                                                                      | Female | 0.1104 | 0.0150 | 87     |    |
|                                                                                                   |                                                                                                      | Male   | 0.1093 | 0.0161 | 73     |    |
|                                                                                                   |                                                                                                      | Total  | 0.1099 | 0.0155 | 160    |    |
| Semantic Network Subnetwork<br>Modularity in the Beta Frequency<br>Band to Negative False Alarms  |                                                                                                      | DMT    | Female | 0.1117 | 0.0130 | 49 |
|                                                                                                   | Male                                                                                                 |        | 0.1081 | 0.0154 | 37     |    |
|                                                                                                   | Total                                                                                                |        | 0.1101 | 0.0141 | 86     |    |
|                                                                                                   | PST                                                                                                  | Female | 0.1113 | 0.0135 | 38     |    |
|                                                                                                   |                                                                                                      | Male   | 0.1072 | 0.0119 | 36     |    |
|                                                                                                   |                                                                                                      | Total  | 0.1093 | 0.0128 | 74     |    |
|                                                                                                   | Total                                                                                                | Female | 0.1150 | 0.0132 | 87     |    |
|                                                                                                   |                                                                                                      | Male   | 0.1076 | 0.0137 | 73     |    |
|                                                                                                   |                                                                                                      | Total  | 0.1097 | 0.0135 | 160    |    |
|                                                                                                   | Semantic Network Subnetwork<br>Modularity in the Gamma<br>Frequency Band to Negative False<br>Alarms | DMT    | Female | 0.1061 | 0.0154 | 49 |
| Male                                                                                              |                                                                                                      |        | 0.1062 | 0.0174 | 37     |    |
| Total                                                                                             |                                                                                                      |        | 0.1061 | 0.0162 | 86     |    |
| PST                                                                                               |                                                                                                      | Female | 0.1071 | 0.0159 | 38     |    |
|                                                                                                   |                                                                                                      | Male   | 0.1065 | 0.0164 | 36     |    |
|                                                                                                   |                                                                                                      | Total  | 0.1068 | 0.0160 | 74     |    |
| Total                                                                                             |                                                                                                      | Female | 0.1065 | 0.0155 | 87     |    |
|                                                                                                   |                                                                                                      | Male   | 0.1064 | 0.0168 | 73     |    |
|                                                                                                   |                                                                                                      | Total  | 0.1065 | 0.0161 | 160    |    |

Table 21

Table 22: Semantic Memory Select Network Modularity to Negative False Alarms



| Table 22                                                                                        |                                                                                                 |               |             |           |          |    |
|-------------------------------------------------------------------------------------------------|-------------------------------------------------------------------------------------------------|---------------|-------------|-----------|----------|----|
| Semantic Network Select Network Modularity to Negative False Alarms                             |                                                                                                 |               |             |           |          |    |
| <u>Variable</u>                                                                                 | <u>Condition</u>                                                                                | <u>Gender</u> | <u>Mean</u> | <u>SD</u> | <u>N</u> |    |
| Semantic Network Select Network Modularity in the Theta Frequency Band to Negative False Alarms | DMT                                                                                             | Female        | -0.0089     | 0.0050    | 49       |    |
|                                                                                                 |                                                                                                 | Male          | -0.0082     | 0.0051    | 37       |    |
|                                                                                                 |                                                                                                 | Total         | -0.0086     | 0.0051    | 86       |    |
|                                                                                                 | PST                                                                                             | Female        | -0.0093     | 0.0053    | 38       |    |
|                                                                                                 |                                                                                                 | Male          | -0.0079     | 0.0061    | 36       |    |
|                                                                                                 |                                                                                                 | Total         | -0.0086     | 0.0057    | 74       |    |
|                                                                                                 | Total                                                                                           | Female        | -0.0091     | 0.0051    | 87       |    |
|                                                                                                 |                                                                                                 | Male          | -0.0081     | 0.0056    | 73       |    |
|                                                                                                 |                                                                                                 | Total         | -0.0086     | 0.0053    | 160      |    |
|                                                                                                 | Semantic Network Select Network Modularity in the Alpha Frequency Band to Negative False Alarms | DMT           | Female      | -0.0060   | 0.0053   | 49 |
|                                                                                                 |                                                                                                 |               | Male        | -0.0065   | 0.0052   | 37 |
|                                                                                                 |                                                                                                 |               | Total       | -0.0062   | 0.0051   | 86 |
| PST                                                                                             |                                                                                                 | Female        | -0.0059     | 0.0049    | 38       |    |
|                                                                                                 |                                                                                                 | Male          | -0.0062     | 0.0076    | 36       |    |
|                                                                                                 |                                                                                                 | Total         | -0.0060     | 0.0063    | 74       |    |
| Total                                                                                           |                                                                                                 | Female        | -0.0059     | 0.0051    | 87       |    |
|                                                                                                 |                                                                                                 | Male          | -0.0064     | 0.0065    | 73       |    |
|                                                                                                 |                                                                                                 | Total         | -0.0061     | 0.0058    | 160      |    |
| Semantic Network Select Network Modularity in the Beta Frequency Band to Negative False Alarms  |                                                                                                 | DMT           | Female      | -0.0069   | 0.0043   | 49 |
|                                                                                                 |                                                                                                 |               | Male        | -0.0057   | 0.0046   | 37 |
|                                                                                                 |                                                                                                 |               | Total       | -0.0063   | 0.0044   | 86 |
|                                                                                                 | PST                                                                                             | Female        | -0.0064     | 0.0052    | 38       |    |
|                                                                                                 |                                                                                                 | Male          | -0.0067     | 0.0052    | 36       |    |
|                                                                                                 |                                                                                                 | Total         | -0.0065     | 0.0052    | 74       |    |
|                                                                                                 | Total                                                                                           | Female        | -0.0067     | 0.0047    | 87       |    |
|                                                                                                 |                                                                                                 | Male          | -0.0062     | 0.0049    | 73       |    |
|                                                                                                 |                                                                                                 | Total         | -0.0064     | 0.0048    | 160      |    |
|                                                                                                 | Semantic Network Select Network Modularity in the Gamma Frequency Band to Negative False Alarms | DMT           | Female      | -0.0072   | 0.0054   | 49 |
|                                                                                                 |                                                                                                 |               | Male        | -0.0079   | 0.0064   | 37 |
|                                                                                                 |                                                                                                 |               | Total       | -0.0075   | 0.0058   | 86 |
| PST                                                                                             |                                                                                                 | Female        | -0.0061     | 0.0052    | 38       |    |
|                                                                                                 |                                                                                                 | Male          | -0.0067     | 0.0052    | 36       |    |
|                                                                                                 |                                                                                                 | Total         | -0.0064     | 0.0051    | 74       |    |
| Total                                                                                           |                                                                                                 | Female        | -0.0067     | 0.0053    | 87       |    |
|                                                                                                 |                                                                                                 | Male          | -0.0073     | 0.0058    | 73       |    |
|                                                                                                 |                                                                                                 | Total         | -0.0070     | 0.0055    | 160      |    |

Table 22

Table 23: Semantic Memory Subnetwork Modularity to Negative Correct Rejections

| Table 23                                                                                                       |                                                                                                                |        |        |        |        |     |
|----------------------------------------------------------------------------------------------------------------|----------------------------------------------------------------------------------------------------------------|--------|--------|--------|--------|-----|
| Semantic Network Subnetwork Modularity to Correct Rejections for Negative Feedback                             |                                                                                                                |        |        |        |        |     |
| Variable                                                                                                       | Condition                                                                                                      | Gender | Mean   | SD     | N      |     |
| Semantic Network Subnetwork Modularity in the Theta Frequency Band to Correct Rejections for Negative Feedback | DMT                                                                                                            | Female | 0.0895 | 0.0082 | 49     |     |
|                                                                                                                |                                                                                                                | Male   | 0.0931 | 0.0052 | 37     |     |
|                                                                                                                |                                                                                                                | Total  | 0.0910 | 0.0073 | 86     |     |
|                                                                                                                | PST                                                                                                            | Female | 0.0904 | 0.0106 | 38     |     |
|                                                                                                                |                                                                                                                | Male   | 0.0914 | 0.0065 | 36     |     |
|                                                                                                                |                                                                                                                | Total  | 0.0908 | 0.0088 | 74     |     |
|                                                                                                                | Total                                                                                                          | Female | 0.0899 | 0.0093 | 87     |     |
|                                                                                                                |                                                                                                                | Male   | 0.0922 | 0.0059 | 73     |     |
|                                                                                                                |                                                                                                                |        | Total  | 0.0909 | 0.0080 | 160 |
|                                                                                                                | Semantic Network Subnetwork Modularity in the Alpha Frequency Band to Correct Rejections for Negative Feedback | DMT    | Female | 0.1175 | 0.0160 | 49  |
| Male                                                                                                           |                                                                                                                |        | 0.1232 | 0.0203 | 37     |     |
| Total                                                                                                          |                                                                                                                |        | 0.1199 | 0.0181 | 86     |     |
| PST                                                                                                            |                                                                                                                | Female | 0.1215 | 0.0169 | 38     |     |
|                                                                                                                |                                                                                                                | Male   | 0.1163 | 0.0208 | 36     |     |
|                                                                                                                |                                                                                                                | Total  | 0.1189 | 0.0190 | 74     |     |
| Total                                                                                                          |                                                                                                                | Female | 0.1192 | 0.0164 | 87     |     |
|                                                                                                                |                                                                                                                | Male   | 0.1198 | 0.0207 | 73     |     |
|                                                                                                                |                                                                                                                | Total  | 0.1195 | 0.0184 | 160    |     |
| Semantic Network Subnetwork Modularity in the Beta Frequency Band to Correct Rejections for Negative Feedback  |                                                                                                                | DMT    | Female | 0.1184 | 0.0169 | 49  |
|                                                                                                                | Male                                                                                                           |        | 0.1232 | 0.0173 | 37     |     |
|                                                                                                                | Total                                                                                                          |        | 0.1205 | 0.0172 | 86     |     |
|                                                                                                                | PST                                                                                                            | Female | 0.1615 | 0.1218 | 38     |     |
|                                                                                                                |                                                                                                                | Male   | 0.1196 | 0.0152 | 36     |     |
|                                                                                                                |                                                                                                                | Total  | 0.1207 | 0.0178 | 74     |     |
|                                                                                                                | Total                                                                                                          | Female | 0.1199 | 0.0183 | 87     |     |
|                                                                                                                |                                                                                                                | Male   | 0.1214 | 0.0163 | 73     |     |
|                                                                                                                |                                                                                                                |        | Total  | 0.1206 | 0.0174 | 160 |
|                                                                                                                | Semantic Network Subnetwork Modularity in the Gamma Frequency Band to Correct Rejections for Negative Feedback | DMT    | Female | 0.1096 | 0.0152 | 49  |
| Male                                                                                                           |                                                                                                                |        | 0.1116 | 0.0194 | 37     |     |
| Total                                                                                                          |                                                                                                                |        | 0.1105 | 0.0170 | 86     |     |
| PST                                                                                                            |                                                                                                                | Female | 0.1159 | 0.0178 | 38     |     |
|                                                                                                                |                                                                                                                | Male   | 0.1115 | 0.0147 | 36     |     |
|                                                                                                                |                                                                                                                | Total  | 0.1137 | 0.0164 | 74     |     |
| Total                                                                                                          |                                                                                                                | Female | 0.1124 | 0.0166 | 87     |     |
|                                                                                                                |                                                                                                                | Male   | 0.1115 | 0.0171 | 73     |     |
|                                                                                                                |                                                                                                                | Total  | 0.1120 | 0.0168 | 160    |     |

Table 24: Semantic Memory Select Network Modularity to Negative Correct Rejections

| Table 24                                                                                                               |                                                                                                                         |               |             |           |          |    |
|------------------------------------------------------------------------------------------------------------------------|-------------------------------------------------------------------------------------------------------------------------|---------------|-------------|-----------|----------|----|
| Semantic Network Selected Network Modularity to Correct Rejections for Negative Feedback                               |                                                                                                                         |               |             |           |          |    |
| <u>Variable</u>                                                                                                        | <u>Condition</u>                                                                                                        | <u>Gender</u> | <u>Mean</u> | <u>SD</u> | <u>N</u> |    |
| Semantic Network Selected Network Modularity in the Theta Frequency Band to Correct Rejections for Negative Feedback   | DMT                                                                                                                     | Female        | -0.0086     | 0.0035    | 49       |    |
|                                                                                                                        |                                                                                                                         | Male          | -0.0076     | 0.0037    | 37       |    |
|                                                                                                                        |                                                                                                                         | Total         | -0.0082     | 0.0036    | 86       |    |
|                                                                                                                        | PST                                                                                                                     | Female        | -0.0089     | 0.0045    | 38       |    |
|                                                                                                                        |                                                                                                                         | Male          | -0.0083     | 0.0043    | 36       |    |
|                                                                                                                        |                                                                                                                         | Total         | -0.0086     | 0.0044    | 74       |    |
|                                                                                                                        | Total                                                                                                                   | Female        | -0.0087     | 0.0040    | 87       |    |
|                                                                                                                        |                                                                                                                         | Male          | -0.0080     | 0.0040    | 73       |    |
|                                                                                                                        |                                                                                                                         | Total         | -0.0084     | 0.0040    | 160      |    |
|                                                                                                                        | Semantic Network Selected Network Modularity in the Alpha Frequency Band to Correct Rejections for Negative Feedback    | DMT           | Female      | -0.0069   | 0.0045   | 49 |
|                                                                                                                        |                                                                                                                         |               | Male        | -0.0066   | 0.0046   | 37 |
|                                                                                                                        |                                                                                                                         |               | Total       | -0.0068   | 0.0045   | 86 |
| PST                                                                                                                    |                                                                                                                         | Female        | -0.0051     | 0.0051    | 38       |    |
|                                                                                                                        |                                                                                                                         | Male          | -0.0067     | 0.0055    | 36       |    |
|                                                                                                                        |                                                                                                                         | Total         | -0.0059     | 0.0053    | 74       |    |
| Total                                                                                                                  |                                                                                                                         | Female        | -0.0061     | 0.0048    | 87       |    |
|                                                                                                                        |                                                                                                                         | Male          | -0.0066     | 0.0050    | 73       |    |
|                                                                                                                        |                                                                                                                         | Total         | -0.0064     | 0.0049    | 160      |    |
| Semantic Network Selected Network Modularity in the Beta Frequency Band to to Correct Rejections for Negative Feedback |                                                                                                                         | DMT           | Female      | -0.0067   | 0.0044   | 49 |
|                                                                                                                        |                                                                                                                         |               | Male        | -0.0059   | 0.0043   | 37 |
|                                                                                                                        |                                                                                                                         |               | Total       | -0.0064   | 0.0044   | 86 |
|                                                                                                                        | PST                                                                                                                     | Female        | -0.0057     | 0.0045    | 38       |    |
|                                                                                                                        |                                                                                                                         | Male          | -0.0062     | 0.0044    | 36       |    |
|                                                                                                                        |                                                                                                                         | Total         | -0.0059     | 0.0044    | 74       |    |
|                                                                                                                        | Total                                                                                                                   | Female        | -0.0062     | 0.0045    | 87       |    |
|                                                                                                                        |                                                                                                                         | Male          | -0.0061     | 0.0043    | 73       |    |
|                                                                                                                        |                                                                                                                         | Total         | -0.0062     | 0.0044    | 160      |    |
|                                                                                                                        | Semantic Network Selected Network Modularity in the Gamma Frequency Band to to Correct Rejections for Negative Feedback | DMT           | Female      | -0.0074   | 0.0047   | 49 |
|                                                                                                                        |                                                                                                                         |               | Male        | -0.0082   | 0.0046   | 37 |
|                                                                                                                        |                                                                                                                         |               | Total       | -0.0077   | 0.0047   | 86 |
| PST                                                                                                                    |                                                                                                                         | Female        | -0.0071     | 0.0038    | 38       |    |
|                                                                                                                        |                                                                                                                         | Male          | -0.0083     | 0.0054    | 36       |    |
|                                                                                                                        |                                                                                                                         | Total         | -0.0077     | 0.0046    | 74       |    |
| Total                                                                                                                  |                                                                                                                         | Female        | -0.0073     | 0.0043    | 87       |    |
|                                                                                                                        |                                                                                                                         | Male          | -0.0082     | 0.0050    | 73       |    |
|                                                                                                                        |                                                                                                                         | Total         | -0.0077     | 0.0046    | 160      |    |

Table 25: Semantic Memory Subnetwork Modularity to Positive Hits

| Table 25                              |                  |               |             |           |          |  |
|---------------------------------------|------------------|---------------|-------------|-----------|----------|--|
| Semantic Network to Positive Hits     |                  |               |             |           |          |  |
| <u>Variable</u>                       | <u>Condition</u> | <u>Gender</u> | <u>Mean</u> | <u>SD</u> | <u>N</u> |  |
| Semantic Network Subnetwork           |                  | Female        | 0.1039      | 0.0098    | 33       |  |
| Modularity in the Theta Frequency     | Threat           | Male          | 0.0977      | 0.0102    | 28       |  |
| Band to Positive Hits                 |                  | Total         | 0.1017      | 0.0104    | 61       |  |
|                                       |                  | Female        | 0.0982      | 0.0079    | 26       |  |
|                                       | Control          | Male          | 0.0968      | 0.0131    | 26       |  |
|                                       |                  | Total         | 0.0975      | 0.0108    | 52       |  |
|                                       |                  | Female        | 0.1014      | 0.0094    | 59       |  |
|                                       | Total            | Male          | 0.0973      | 0.0116    | 54       |  |
|                                       |                  | Total         | 0.0994      | 0.0107    | 113      |  |
| Semantic Network Subnetwork           |                  | Female        | 0.1030      | 0.0100    | 33       |  |
| Modularity in the Alpha Frequency     | Threat           | Male          | 0.1005      | 0.0120    | 28       |  |
| Band to Positive Hits                 |                  | Total         | 0.1019      | 0.0110    | 61       |  |
|                                       |                  | Female        | 0.0991      | 0.0104    | 26       |  |
|                                       | Control          | Male          | 0.1027      | 0.0090    | 26       |  |
|                                       |                  | Total         | 0.1009      | 0.0098    | 52       |  |
|                                       |                  | Female        | 0.1013      | 0.0103    | 59       |  |
|                                       | Total            | Male          | 0.1015      | 0.0106    | 54       |  |
|                                       |                  | Total         | 0.1014      | 0.0104    | 113      |  |
| Semantic Network Subnetwork           |                  | Female        | 0.1017      | 0.0076    | 33       |  |
| Modularity in the Beta Frequency Band | Threat           | Male          | 0.1000      | 0.0092    | 28       |  |
| to Positive Hits                      |                  | Total         | 0.1009      | 0.0083    | 61       |  |
|                                       |                  | Female        | 0.1021      | 0.0080    | 26       |  |
|                                       | Control          | Male          | 0.1025      | 0.0096    | 26       |  |
|                                       |                  | Total         | 0.1023      | 0.0088    | 52       |  |
|                                       |                  | Female        | 0.1019      | 0.0077    | 59       |  |
|                                       | Total            | Male          | 0.1012      | 0.0094    | 54       |  |
|                                       |                  | Total         | 0.1015      | 0.0085    | 113      |  |
| Semantic Network Subnetwork           |                  | Female        | 0.1024      | 0.0117    | 33       |  |
| Modularity in the Gamma Frequency     | Threat           | Male          | 0.1014      | 0.0066    | 28       |  |
| Band to Positive Hits                 |                  | Total         | 0.1020      | 0.0096    | 61       |  |
|                                       |                  | Female        | 0.1005      | 0.0125    | 26       |  |
|                                       | Control          | Male          | 0.1002      | 0.0136    | 26       |  |
|                                       |                  | Total         | 0.1004      | 0.0129    | 52       |  |
|                                       |                  | Female        | 0.1016      | 0.0120    | 59       |  |
|                                       | Total            | Male          | 0.1008      | 0.0105    | 54       |  |
|                                       |                  | Total         | 0.1012      | 0.0113    | 113      |  |

Table 25

Table 26: Semantic Memory Select Network Modularity to Positive Hits

| Table 26                                                                                      |                                                                                               |        |         |         |        |     |  |
|-----------------------------------------------------------------------------------------------|-----------------------------------------------------------------------------------------------|--------|---------|---------|--------|-----|--|
| Semantic Network to Positive Hits                                                             |                                                                                               |        |         |         |        |     |  |
| Variable                                                                                      | Condition                                                                                     | Gender | Mean    | SD      | N      |     |  |
| Semantic Network Select Network<br>Modularity in the Theta Frequency Band<br>to Positive Hits | Threat                                                                                        | Female | -0.0089 | 0.0069  | 33     |     |  |
|                                                                                               |                                                                                               | Male   | -0.0071 | 0.0064  | 28     |     |  |
|                                                                                               |                                                                                               | Total  | -0.0081 | 0.0067  | 61     |     |  |
|                                                                                               | Control                                                                                       | Female | -0.0057 | 0.0080  | 26     |     |  |
|                                                                                               |                                                                                               | Male   | -0.0079 | 0.0069  | 26     |     |  |
|                                                                                               |                                                                                               | Total  | -0.0068 | 0.0075  | 52     |     |  |
|                                                                                               | Total                                                                                         | Female | -0.0075 | 0.0075  | 59     |     |  |
|                                                                                               |                                                                                               | Male   | -0.0073 | 0.0068  | 54     |     |  |
|                                                                                               |                                                                                               |        | Total   | -0.0075 | 0.0071 | 113 |  |
|                                                                                               | Semantic Network Select Network<br>Modularity in the Alpha Frequency Band<br>to Positive Hits | Threat | Female  | -0.0059 | 0.0067 | 33  |  |
|                                                                                               |                                                                                               |        | Male    | -0.0071 | 0.0068 | 28  |  |
| Total                                                                                         |                                                                                               |        | -0.0065 | 0.0067  | 61     |     |  |
| Control                                                                                       |                                                                                               | Female | -0.0073 | 0.0075  | 26     |     |  |
|                                                                                               |                                                                                               | Male   | -0.0076 | 0.0070  | 26     |     |  |
|                                                                                               |                                                                                               | Total  | -0.0074 | 0.0072  | 52     |     |  |
| Total                                                                                         |                                                                                               | Female | -0.0065 | 0.0071  | 59     |     |  |
|                                                                                               |                                                                                               | Male   | -0.0073 | 0.0068  | 54     |     |  |
|                                                                                               |                                                                                               | Total  | -0.0069 | 0.0069  | 113    |     |  |
| Semantic Network Select Network<br>Modularity in the Beta Frequency Band<br>to Positive Hits  |                                                                                               | Threat | Female  | -0.0067 | 0.0078 | 33  |  |
|                                                                                               |                                                                                               |        | Male    | -0.0055 | 0.0055 | 28  |  |
|                                                                                               | Total                                                                                         |        | -0.0062 | 0.0068  | 61     |     |  |
|                                                                                               | Control                                                                                       | Female | -0.0060 | 0.0069  | 26     |     |  |
|                                                                                               |                                                                                               | Male   | -0.0062 | 0.0077  | 26     |     |  |
|                                                                                               |                                                                                               | Total  | -0.0074 | 0.0072  | 52     |     |  |
|                                                                                               | Total                                                                                         | Female | -0.0064 | 0.0073  | 59     |     |  |
|                                                                                               |                                                                                               | Male   | -0.0059 | 0.0066  | 54     |     |  |
|                                                                                               |                                                                                               |        | Total   | -0.0062 | 0.0070 | 113 |  |
|                                                                                               | Semantic Network Select Network<br>Modularity in the Gamma Frequency<br>Band to Positive Hits | Threat | Female  | -0.0091 | 0.0085 | 33  |  |
|                                                                                               |                                                                                               |        | Male    | -0.0095 | 0.0091 | 28  |  |
| Total                                                                                         |                                                                                               |        | -0.0093 | 0.0087  | 61     |     |  |
| Control                                                                                       |                                                                                               | Female | -0.0052 | 0.0095  | 26     |     |  |
|                                                                                               |                                                                                               | Male   | -0.0070 | 0.0083  | 26     |     |  |
|                                                                                               |                                                                                               | Total  | -0.0061 | 0.0089  | 52     |     |  |
| Total                                                                                         |                                                                                               | Female | -0.0074 | 0.0091  | 59     |     |  |
|                                                                                               |                                                                                               | Male   | -0.0083 | 0.0088  | 54     |     |  |
|                                                                                               |                                                                                               | Total  | -0.0078 | 0.0089  | 113    |     |  |

Table 26

Table 27: Semantic Network Subnetwork Modularity to Positive False Alarms

| Table 27                                                                                             |           |        |         |        |     |
|------------------------------------------------------------------------------------------------------|-----------|--------|---------|--------|-----|
| Semantic Network Subnetwork Modularity to Positive False Alarms                                      |           |        |         |        |     |
| Variable                                                                                             | Condition | Gender | Mean    | SD     | N   |
| Semantic Network Subnetwork<br>Modularity in the Theta Frequency<br>Band to Positive False Alarms    | DMT       | Female | 0.0941  | 0.0072 | 49  |
|                                                                                                      |           | Male   | 0.0942  | 0.0104 | 37  |
|                                                                                                      |           | Total  | 0.0941  | 0.0087 | 86  |
|                                                                                                      | PST       | Female | 0.9280  | 0.0075 | 38  |
|                                                                                                      |           | Male   | 0.0906  | 0.0085 | 35  |
|                                                                                                      |           | Total  | 0.0917  | 0.0080 | 73  |
|                                                                                                      | Total     | Female | 0.0935  | 0.0074 | 87  |
|                                                                                                      |           | Male   | -0.2449 | 0.0062 | 72  |
|                                                                                                      |           | Total  | 0.0930  | 0.0084 | 159 |
| Semantic Network Subnetwork<br>Modularity in the Alpha Frequency<br>Band to Positive False Alarms    | DMT       | Female | 0.1120  | 0.0157 | 49  |
|                                                                                                      |           | Male   | 0.1151  | 0.0151 | 37  |
|                                                                                                      |           | Total  | 0.1133  | 0.0154 | 86  |
|                                                                                                      | PST       | Female | 0.1154  | 0.0164 | 38  |
|                                                                                                      |           | Male   | 0.1073  | 0.0169 | 35  |
|                                                                                                      |           | Total  | 0.1115  | 0.0170 | 73  |
|                                                                                                      | Total     | Female | 0.1135  | 0.0160 | 87  |
|                                                                                                      |           | Male   | 0.1113  | 0.0164 | 72  |
|                                                                                                      |           | Total  | 0.1125  | 0.0161 | 159 |
| Semantic Network Subnetwork<br>Modularity in the Beta Frequency<br>Band to Positive False Alarms     | DMT       | Female | 0.1117  | 0.0138 | 49  |
|                                                                                                      |           | Male   | 0.1103  | 0.0146 | 37  |
|                                                                                                      |           | Total  | 0.1111  | 0.0141 | 86  |
|                                                                                                      | PST       | Female | 0.1135  | 0.0172 | 38  |
|                                                                                                      |           | Male   | 0.1090  | 0.0141 | 35  |
|                                                                                                      |           | Total  | 0.1113  | 0.0158 | 73  |
|                                                                                                      | Total     | Female | 0.1125  | 0.0153 | 87  |
|                                                                                                      |           | Male   | 0.1096  | 0.1426 | 72  |
|                                                                                                      |           | Total  | 0.1112  | 0.0149 | 159 |
| Semantic Network Subnetwork<br>Modularity in the Gamma<br>Frequency Band to Positive False<br>Alarms | DMT       | Female | 0.1060  | 0.0142 | 49  |
|                                                                                                      |           | Male   | 0.1103  | 0.0169 | 37  |
|                                                                                                      |           | Total  | 0.1079  | 0.0155 | 86  |
|                                                                                                      | PST       | Female | 0.1089  | 0.0151 | 38  |
|                                                                                                      |           | Male   | 0.0998  | 0.0158 | 35  |
|                                                                                                      |           | Total  | 0.1045  | 0.0160 | 73  |
|                                                                                                      | Total     | Female | 0.1072  | 0.0146 | 87  |
|                                                                                                      |           | Male   | 0.1052  | 0.0171 | 72  |
|                                                                                                      |           | Total  | 0.1063  | 0.0158 | 159 |

Table 27

Table 28: Semantic Network Select Network Modularity to Positive False Alarms

| Table 28                                                                                        |                                                                                                 |        |         |         |        |    |
|-------------------------------------------------------------------------------------------------|-------------------------------------------------------------------------------------------------|--------|---------|---------|--------|----|
| Semantic Network Select Network Modularity to Positive False Alarms                             |                                                                                                 |        |         |         |        |    |
| Variable                                                                                        | Condition                                                                                       | Gender | Mean    | SD      | N      |    |
| Semantic Network Select Network Modularity in the Theta Frequency Band to Positive False Alarms | DMT                                                                                             | Female | -0.0094 | 0.0053  | 49     |    |
|                                                                                                 |                                                                                                 | Male   | -0.0066 | 0.0046  | 37     |    |
|                                                                                                 |                                                                                                 | Total  | -0.0081 | 0.0052  | 86     |    |
|                                                                                                 | PST                                                                                             | Female | -0.0082 | 0.0052  | 38     |    |
|                                                                                                 |                                                                                                 | Male   | -0.0087 | 0.0043  | 35     |    |
|                                                                                                 |                                                                                                 | Total  | -0.0084 | 0.0048  | 73     |    |
|                                                                                                 | Total                                                                                           | Female | -0.8841 | 0.0053  | 87     |    |
|                                                                                                 |                                                                                                 | Male   | -0.0076 | 0.0046  | 72     |    |
|                                                                                                 |                                                                                                 | Total  | -0.0083 | 0.0050  | 159    |    |
|                                                                                                 | Semantic Network Select Network Modularity in the Alpha Frequency Band to Positive False Alarms | DMT    | Female  | -0.0062 | 0.0058 | 49 |
|                                                                                                 |                                                                                                 |        | Male    | -0.0061 | 0.0061 | 37 |
|                                                                                                 |                                                                                                 |        | Total   | -0.0062 | 0.0059 | 86 |
|                                                                                                 |                                                                                                 | PST    | Female  | -0.0063 | 0.0062 | 38 |
|                                                                                                 |                                                                                                 |        | Male    | -0.0068 | 0.0056 | 35 |
|                                                                                                 |                                                                                                 |        | Total   | -0.0065 | 0.0059 | 73 |
| Total                                                                                           |                                                                                                 | Female | -0.0062 | 0.0059  | 87     |    |
|                                                                                                 |                                                                                                 | Male   | -0.0065 | 0.0058  | 72     |    |
|                                                                                                 |                                                                                                 | Total  | -0.0063 | 0.0059  | 159    |    |
| Semantic Network Select Network Modularity in the Beta Frequency Band to Positive False Alarms  |                                                                                                 | DMT    | Female  | -0.0053 | 0.0062 | 49 |
|                                                                                                 |                                                                                                 |        | Male    | -0.0062 | 0.0053 | 37 |
|                                                                                                 |                                                                                                 |        | Total   | -0.0057 | 0.0059 | 86 |
|                                                                                                 |                                                                                                 | PST    | Female  | -0.0062 | 0.0058 | 38 |
|                                                                                                 |                                                                                                 |        | Male    | -0.0060 | 0.0048 | 35 |
|                                                                                                 |                                                                                                 |        | Total   | -0.0061 | 0.0053 | 73 |
|                                                                                                 | Total                                                                                           | Female | -0.0057 | 0.0060  | 87     |    |
|                                                                                                 |                                                                                                 | Male   | -0.0061 | 0.0050  | 72     |    |
|                                                                                                 |                                                                                                 | Total  | -0.0059 | 0.0056  | 159    |    |
|                                                                                                 | Semantic Network Select Network Modularity in the Gamma Frequency Band to Positive False Alarms | DMT    | Female  | -0.0072 | 0.0057 | 49 |
|                                                                                                 |                                                                                                 |        | Male    | -0.0066 | 0.0062 | 37 |
|                                                                                                 |                                                                                                 |        | Total   | -0.0069 | 0.0059 | 86 |
|                                                                                                 |                                                                                                 | PST    | Female  | -0.0057 | 0.0064 | 38 |
|                                                                                                 |                                                                                                 |        | Male    | -0.0071 | 0.0046 | 35 |
|                                                                                                 |                                                                                                 |        | Total   | -0.0064 | 0.0057 | 73 |
| Total                                                                                           |                                                                                                 | Female | -0.0065 | 0.0060  | 87     |    |
|                                                                                                 |                                                                                                 | Male   | -0.0068 | 0.0055  | 72     |    |
|                                                                                                 |                                                                                                 | Total  | -0.0078 | 0.0058  | 159    |    |

Table 28

Table 29: Semantic Network Subnetwork Modularity to Positive Correct Rejections

| Table 29                                                                           |                  |               |             |           |          |
|------------------------------------------------------------------------------------|------------------|---------------|-------------|-----------|----------|
| Semantic Network Subnetwork Modularity to Correct Rejections for Positive Feedback |                  |               |             |           |          |
| <u>Variable</u>                                                                    | <u>Condition</u> | <u>Gender</u> | <u>Mean</u> | <u>SD</u> | <u>N</u> |
| Semantic Network Subnetwork                                                        |                  | Female        | 0.0884      | 0.0098    | 49       |
| Modularity in the Theta Frequency                                                  | DMT              | Male          | 0.0917      | 0.0080    | 37       |
| Band to Correct Rejections for                                                     |                  | Total         | 0.0898      | 0.0092    | 86       |
| Positive Feedback                                                                  |                  | Female        | 0.0911      | 0.0074    | 38       |
|                                                                                    | PST              | Male          | 0.0938      | 0.0075    | 35       |
|                                                                                    |                  | Total         | 0.0924      | 0.0075    | 73       |
|                                                                                    |                  | Female        | 0.0896      | 0.0089    | 87       |
|                                                                                    | Total            | Male          | 0.0927      | 0.0078    | 72       |
|                                                                                    |                  | Total         | 0.0910      | 0.0085    | 159      |
| Semantic Network Subnetwork                                                        |                  | Female        | 0.1202      | 0.0188    | 49       |
| Modularity in the Alpha Frequency                                                  | DMT              | Male          | 0.1191      | 0.0223    | 37       |
| Band to Correct Rejections for                                                     |                  | Total         | 0.1197      | 0.0203    | 86       |
| Positive Feedback                                                                  |                  | Female        | 0.1227      | 0.0162    | 38       |
|                                                                                    | PST              | Male          | 0.1149      | 0.0155    | 35       |
|                                                                                    |                  | Total         | 0.1190      | 0.0162    | 73       |
|                                                                                    |                  | Female        | 0.1213      | 0.0177    | 87       |
|                                                                                    | Total            | Male          | 0.1170      | 0.0193    | 72       |
|                                                                                    |                  | Total         | 0.1194      | 0.0185    | 159      |
| Semantic Network Subnetwork                                                        |                  | Female        | 0.1208      | 0.0169    | 49       |
| Modularity in the Beta Frequency                                                   | DMT              | Male          | 0.1224      | 0.0182    | 37       |
| Band to Correct Rejections for                                                     |                  | Total         | 0.1215      | 0.0174    | 86       |
| Positive Feedback                                                                  |                  | Female        | 0.1262      | 0.0158    | 38       |
|                                                                                    | PST              | Male          | 0.1217      | 0.0135    | 35       |
|                                                                                    |                  | Total         | 0.1240      | 0.0148    | 73       |
|                                                                                    |                  | Female        | 0.1232      | 0.0166    | 87       |
|                                                                                    | Total            | Male          | 0.1221      | 0.0160    | 72       |
|                                                                                    |                  | Total         | 0.1227      | 0.0182    | 159      |
| Semantic Network Subnetwork                                                        |                  | Female        | 0.1079      | 0.0190    | 49       |
| Modularity in the Gamma                                                            | DMT              | Male          | 0.1133      | 0.0204    | 37       |
| Frequency Band to Correct                                                          |                  | Total         | 0.1103      | 0.0197    | 86       |
| Rejections for Positive Feedback                                                   |                  | Female        | 0.1109      | 0.0175    | 38       |
|                                                                                    | PST              | Male          | 0.1082      | 0.0153    | 35       |
|                                                                                    |                  | Total         | 0.1096      | 0.0164    | 73       |
|                                                                                    |                  | Female        | 0.1092      | 0.0183    | 87       |
|                                                                                    | Total            | Male          | 0.1108      | 0.0182    | 72       |
|                                                                                    |                  | Total         | 0.1100      | 0.0182    | 159      |

Table 29

Table 30: Semantic Network Select Network Modularity to Positive Correct Rejections



| Table 30                                                                                                             |                                                                                                                      |        |         |         |        |    |
|----------------------------------------------------------------------------------------------------------------------|----------------------------------------------------------------------------------------------------------------------|--------|---------|---------|--------|----|
| Semantic Network Selected Network Modularity to Correct Rejections for Positive Feedback                             |                                                                                                                      |        |         |         |        |    |
| Variable                                                                                                             | Condition                                                                                                            | Gender | Mean    | SD      | N      |    |
| Semantic Network Selected Network Modularity in the Theta Frequency Band to Correct Rejections for Positive Feedback | DMT                                                                                                                  | Female | -0.0080 | 0.0037  | 49     |    |
|                                                                                                                      |                                                                                                                      | Male   | -0.0090 | 0.0042  | 37     |    |
|                                                                                                                      |                                                                                                                      | Total  | -0.0084 | 0.0039  | 86     |    |
|                                                                                                                      | PST                                                                                                                  | Female | -0.0102 | 0.0042  | 38     |    |
|                                                                                                                      |                                                                                                                      | Male   | -0.0082 | 0.0050  | 35     |    |
|                                                                                                                      |                                                                                                                      | Total  | -0.0092 | 0.0047  | 73     |    |
|                                                                                                                      | Total                                                                                                                | Female | -0.0090 | 0.0041  | 87     |    |
|                                                                                                                      |                                                                                                                      | Male   | -0.0086 | 0.0460  | 72     |    |
|                                                                                                                      |                                                                                                                      | Total  | -0.0088 | 0.0043  | 159    |    |
|                                                                                                                      | Semantic Network Selected Network Modularity in the Alpha Frequency Band to Correct Rejections for Positive Feedback | DMT    | Female  | -0.0062 | 0.0045 | 49 |
|                                                                                                                      |                                                                                                                      |        | Male    | -0.0056 | 0.0035 | 37 |
|                                                                                                                      |                                                                                                                      |        | Total   | -0.0060 | 0.0041 | 86 |
| PST                                                                                                                  |                                                                                                                      | Female | -0.0076 | 0.0042  | 38     |    |
|                                                                                                                      |                                                                                                                      | Male   | -0.0061 | 0.0057  | 35     |    |
|                                                                                                                      |                                                                                                                      | Total  | -0.0069 | 0.0050  | 73     |    |
| Total                                                                                                                |                                                                                                                      | Female | -0.0069 | 0.0041  | 87     |    |
|                                                                                                                      |                                                                                                                      | Male   | -0.0058 | 0.0047  | 72     |    |
|                                                                                                                      |                                                                                                                      | Total  | -0.0064 | 0.0045  | 159    |    |
| Semantic Network Selected Network Modularity in the Beta Frequency Band to Correct Rejections for Positive Feedback  |                                                                                                                      | DMT    | Female  | -0.0048 | 0.0049 | 49 |
|                                                                                                                      |                                                                                                                      |        | Male    | -0.0053 | 0.0047 | 37 |
|                                                                                                                      |                                                                                                                      |        | Total   | -0.0050 | 0.0048 | 86 |
|                                                                                                                      | PST                                                                                                                  | Female | -0.0070 | 0.0042  | 38     |    |
|                                                                                                                      |                                                                                                                      | Male   | -0.0065 | 0.0051  | 35     |    |
|                                                                                                                      |                                                                                                                      | Total  | -0.0068 | 0.0046  | 73     |    |
|                                                                                                                      | Total                                                                                                                | Female | -0.0576 | 0.0047  | 87     |    |
|                                                                                                                      |                                                                                                                      | Male   | -0.0059 | 0.0049  | 72     |    |
|                                                                                                                      |                                                                                                                      | Total  | -0.0058 | 0.0048  | 159    |    |
|                                                                                                                      | Semantic Network Selected Network Modularity in the Gamma Frequency Band to Correct Rejections for Positive Feedback | DMT    | Female  | -0.0075 | 0.0048 | 49 |
|                                                                                                                      |                                                                                                                      |        | Male    | -0.0073 | 0.0048 | 37 |
|                                                                                                                      |                                                                                                                      |        | Total   | -0.0074 | 0.0047 | 86 |
| PST                                                                                                                  |                                                                                                                      | Female | -0.0069 | 0.0040  | 38     |    |
|                                                                                                                      |                                                                                                                      | Male   | -0.0081 | 0.0049  | 35     |    |
|                                                                                                                      |                                                                                                                      | Total  | -0.0075 | 0.0045  | 73     |    |
| Total                                                                                                                |                                                                                                                      | Female | -0.0073 | 0.0044  | 87     |    |
|                                                                                                                      |                                                                                                                      | Male   | -0.0077 | 0.0048  | 72     |    |
|                                                                                                                      |                                                                                                                      | Total  | -0.0075 | 0.0046  | 159    |    |

Table 30

Table 31: Emotion Network Subnetwork Modularity to Negative False Alarms

| Table 31                                                                    |           |        |       |       |     |  |
|-----------------------------------------------------------------------------|-----------|--------|-------|-------|-----|--|
| Emotion Network Subnetwork Modularity to False Alarms for Negative Feedback |           |        |       |       |     |  |
| Variable                                                                    | Condition | Gender | Mean  | SD    | N   |  |
| Emotion Network Subnetwork                                                  |           | Female | 0.089 | 0.007 | 49  |  |
| Modularity in the Theta                                                     | DMT       | Male   | 0.087 | 0.008 | 37  |  |
| Frequency Band to Wrong                                                     |           | Total  | 0.089 | 0.007 | 86  |  |
| False Alarms                                                                | PST       | Female | 0.092 | 0.007 | 38  |  |
|                                                                             |           | Male   | 0.088 | 0.006 | 36  |  |
|                                                                             |           | Total  | 0.090 | 0.006 | 74  |  |
|                                                                             | Total     | Female | 0.090 | 0.007 | 87  |  |
|                                                                             |           | Male   | 0.088 | 0.007 | 73  |  |
|                                                                             |           | Total  | 0.089 | 0.007 | 160 |  |
| Emotion Network Subnetwork                                                  |           | Female | 0.091 | 0.009 | 49  |  |
| Modularity in the Alpha                                                     | DMT       | Male   | 0.090 | 0.010 | 37  |  |
| Frequency Band to Wrong                                                     |           | Total  | 0.091 | 0.009 | 86  |  |
| False Alarms                                                                | PST       | Female | 0.094 | 0.010 | 38  |  |
|                                                                             |           | Male   | 0.093 | 0.009 | 36  |  |
|                                                                             |           | Total  | 0.094 | 0.010 | 74  |  |
|                                                                             | Total     | Female | 0.093 | 0.010 | 87  |  |
|                                                                             |           | Male   | 0.091 | 0.009 | 73  |  |
|                                                                             |           | Total  | 0.092 | 0.010 | 160 |  |
| Emotion Network Subnetwork                                                  |           | Female | 0.145 | 0.020 | 49  |  |
| Modularity in the Beta                                                      | DMT       | Male   | 0.144 | 0.018 | 37  |  |
| Frequency Band to Wrong                                                     |           | Total  | 0.144 | 0.019 | 86  |  |
| False Alarms                                                                | PST       | Female | 0.136 | 0.020 | 38  |  |
|                                                                             |           | Male   | 0.137 | 0.017 | 36  |  |
|                                                                             |           | Total  | 0.137 | 0.018 | 74  |  |
|                                                                             | Total     | Female | 0.141 | 0.020 | 87  |  |
|                                                                             |           | Male   | 0.141 | 0.017 | 73  |  |
|                                                                             |           | Total  | 0.141 | 0.019 | 160 |  |
| Emotion Network Subnetwork                                                  |           | Female | 0.091 | 0.011 | 49  |  |
| Modularity in the Gamma                                                     | DMT       | Male   | 0.090 | 0.009 | 37  |  |
| Frequency Band to Wrong                                                     |           | Total  | 0.090 | 0.010 | 86  |  |
| False Alarms                                                                | PST       | Female | 0.096 | 0.010 | 38  |  |
|                                                                             |           | Male   | 0.091 | 0.011 | 36  |  |
|                                                                             |           | Total  | 0.093 | 0.011 | 74  |  |
|                                                                             | Total     | Female | 0.093 | 0.011 | 87  |  |
|                                                                             |           | Male   | 0.090 | 0.010 | 73  |  |
|                                                                             |           | Total  | 0.092 | 0.010 | 160 |  |

Table 31

Table 32: Emotion Network Select Network Modularity to Negative False Alarms

| Table 32                                                                                    |                                                                                             |        |         |         |        |    |
|---------------------------------------------------------------------------------------------|---------------------------------------------------------------------------------------------|--------|---------|---------|--------|----|
| Emotion Network Select Network Modularity to False Alarms for Negative Feedback             |                                                                                             |        |         |         |        |    |
| Variable                                                                                    | Condition                                                                                   | Gender | Mean    | SD      | N      |    |
| Emotion Network Select Network Modularity in the Theta Frequency Band to Wrong False Alarms | DMT                                                                                         | Female | -0.0059 | 0.0051  | 49     |    |
|                                                                                             |                                                                                             | Male   | -0.0057 | 0.0058  | 37     |    |
|                                                                                             |                                                                                             | Total  | -0.0058 | 0.0054  | 86     |    |
|                                                                                             | PST                                                                                         | Female | -0.0039 | 0.0074  | 38     |    |
|                                                                                             |                                                                                             | Male   | -0.0042 | 0.0060  | 36     |    |
|                                                                                             |                                                                                             | Total  | -0.0041 | 0.0067  | 74     |    |
|                                                                                             | Total                                                                                       | Female | -0.0050 | 0.0062  | 87     |    |
|                                                                                             |                                                                                             | Male   | -0.0050 | 0.0059  | 73     |    |
|                                                                                             |                                                                                             | Total  | -0.0050 | 0.0061  | 160    |    |
|                                                                                             | Emotion Network Select Network Modularity in the Alpha Frequency Band to Wrong False Alarms | DMT    | Female  | -0.0005 | 0.0046 | 49 |
|                                                                                             |                                                                                             |        | Male    | -0.0026 | 0.0046 | 37 |
|                                                                                             |                                                                                             |        | Total   | -0.0014 | 0.0047 | 86 |
| PST                                                                                         |                                                                                             | Female | 0.0010  | 0.0059  | 38     |    |
|                                                                                             |                                                                                             | Male   | -0.0003 | 0.0060  | 36     |    |
|                                                                                             |                                                                                             | Total  | 0.0004  | 0.0059  | 74     |    |
| Total                                                                                       |                                                                                             | Female | 0.0002  | 0.0052  | 87     |    |
|                                                                                             |                                                                                             | Male   | -0.0014 | 0.0054  | 73     |    |
|                                                                                             |                                                                                             | Total  | -0.0006 | 0.0054  | 160    |    |
| Emotion Network Select Network Modularity in the Beta Frequency Band to Wrong False Alarms  |                                                                                             | DMT    | Female  | -0.0003 | 0.0040 | 49 |
|                                                                                             |                                                                                             |        | Male    | -0.0022 | 0.0036 | 37 |
|                                                                                             |                                                                                             |        | Total   | -0.0011 | 0.0039 | 86 |
|                                                                                             | PST                                                                                         | Female | -0.0009 | 0.0057  | 38     |    |
|                                                                                             |                                                                                             | Male   | 0.0002  | 0.0059  | 36     |    |
|                                                                                             |                                                                                             | Total  | -0.0004 | 0.0058  | 74     |    |
|                                                                                             | Total                                                                                       | Female | -0.0006 | 0.0048  | 87     |    |
|                                                                                             |                                                                                             | Male   | -0.0010 | 0.0050  | 73     |    |
|                                                                                             |                                                                                             | Total  | -0.0008 | 0.0049  | 160    |    |
|                                                                                             | Emotion Network Select Network Modularity in the Gamma Frequency Band to Wrong False Alarms | DMT    | Female  | -0.0026 | 0.0049 | 49 |
|                                                                                             |                                                                                             |        | Male    | -0.0038 | 0.0054 | 37 |
|                                                                                             |                                                                                             |        | Total   | -0.0031 | 0.0051 | 86 |
| PST                                                                                         |                                                                                             | Female | 0.0006  | 0.0060  | 38     |    |
|                                                                                             |                                                                                             | Male   | -0.0002 | 0.0060  | 36     |    |
|                                                                                             |                                                                                             | Total  | 0.0002  | 0.0060  | 74     |    |
| Total                                                                                       |                                                                                             | Female | -0.0012 | 0.0056  | 87     |    |
|                                                                                             |                                                                                             | Male   | -0.0020 | 0.0059  | 73     |    |
|                                                                                             |                                                                                             | Total  | -0.0016 | 0.0058  | 160    |    |

Table 32

Table 33: Emotion Network Subnetwork Modularity to Negative Correct Rejections

| Table 33                                                                                                  |                                                                                                           |        |        |        |        |    |  |
|-----------------------------------------------------------------------------------------------------------|-----------------------------------------------------------------------------------------------------------|--------|--------|--------|--------|----|--|
| Emotion Network Subnetwork Modularity to Negative Correct Rejections                                      |                                                                                                           |        |        |        |        |    |  |
| Variable                                                                                                  | Condition                                                                                                 | Gender | Mean   | SD     | N      |    |  |
| Emotion Network Subnetwork<br>Modularity in the Theta Frequency<br>Band to Negative Correct<br>Rejections | DMT                                                                                                       | Female | 0.0896 | 0.0060 | 49     |    |  |
|                                                                                                           |                                                                                                           | Male   | 0.0890 | 0.0055 | 37     |    |  |
|                                                                                                           |                                                                                                           | Total  | 0.0894 | 0.0058 | 86     |    |  |
|                                                                                                           |                                                                                                           | PST    | Female | 0.0913 | 0.0064 | 38 |  |
|                                                                                                           |                                                                                                           |        | Male   | 0.0891 | 0.0060 | 36 |  |
|                                                                                                           |                                                                                                           |        | Total  | 0.0902 | 0.0063 | 74 |  |
|                                                                                                           | Total                                                                                                     | Female | 0.0903 | 0.0062 | 87     |    |  |
|                                                                                                           |                                                                                                           | Male   | 0.0891 | 0.0058 | 73     |    |  |
|                                                                                                           |                                                                                                           | Total  | 0.0898 | 0.0060 | 160    |    |  |
|                                                                                                           | Emotion Network Subnetwork<br>Modularity in the Alpha Frequency<br>Band to Negative Correct<br>Rejections | DMT    | Female | 0.0933 | 0.0107 | 49 |  |
|                                                                                                           |                                                                                                           |        | Male   | 0.0943 | 0.0083 | 37 |  |
|                                                                                                           |                                                                                                           |        | Total  | 0.0937 | 0.0097 | 86 |  |
| PST                                                                                                       |                                                                                                           |        | Female | 0.0940 | 0.0066 | 38 |  |
|                                                                                                           |                                                                                                           |        | Male   | 0.0899 | 0.0091 | 36 |  |
|                                                                                                           |                                                                                                           |        | Total  | 0.0920 | 0.0081 | 74 |  |
| Total                                                                                                     |                                                                                                           | Female | 0.0936 | 0.0091 | 87     |    |  |
|                                                                                                           |                                                                                                           | Male   | 0.0921 | 0.0089 | 73     |    |  |
|                                                                                                           |                                                                                                           | Total  | 0.0929 | 0.0090 | 160    |    |  |
| Emotion Network Subnetwork<br>Modularity in the Beta Frequency<br>Band to Negative Correct<br>Rejections  |                                                                                                           | DMT    | Female | 0.0920 | 0.0090 | 49 |  |
|                                                                                                           |                                                                                                           |        | Male   | 0.0913 | 0.0103 | 37 |  |
|                                                                                                           |                                                                                                           |        | Total  | 0.0917 | 0.0095 | 86 |  |
|                                                                                                           | PST                                                                                                       |        | Female | 0.0923 | 0.0091 | 38 |  |
|                                                                                                           |                                                                                                           |        | Male   | 0.0891 | 0.0130 | 36 |  |
|                                                                                                           |                                                                                                           |        | Total  | 0.0908 | 0.0112 | 74 |  |
|                                                                                                           | Total                                                                                                     | Female | 0.0291 | 0.0090 | 87     |    |  |
|                                                                                                           |                                                                                                           | Male   | 0.0902 | 0.0117 | 73     |    |  |
|                                                                                                           |                                                                                                           | Total  | 0.0921 | 0.0086 | 160    |    |  |
|                                                                                                           | Emotion Network Subnetwork<br>Modularity in the Gamma<br>Frequency Band to Negative<br>Correct Rejections | DMT    | Female | 0.0925 | 0.0092 | 49 |  |
|                                                                                                           |                                                                                                           |        | Male   | 0.0912 | 0.0078 | 37 |  |
|                                                                                                           |                                                                                                           |        | Total  | 0.0919 | 0.0086 | 86 |  |
| PST                                                                                                       |                                                                                                           |        | Female | 0.0923 | 0.0083 | 38 |  |
|                                                                                                           |                                                                                                           |        | Male   | 0.0925 | 0.0092 | 36 |  |
|                                                                                                           |                                                                                                           |        | Total  | 0.0924 | 0.0087 | 74 |  |
| Total                                                                                                     |                                                                                                           | Female | 0.0924 | 0.0088 | 87     |    |  |
|                                                                                                           |                                                                                                           | Male   | 0.0918 | 0.0085 | 73     |    |  |
|                                                                                                           |                                                                                                           | Total  | 0.0921 | 0.0086 | 160    |    |  |

Table 34: Emotion Network Select Network Modularity to Negative Correct Rejections

| Table 34                                                                 |                  |               |             |           |          |  |
|--------------------------------------------------------------------------|------------------|---------------|-------------|-----------|----------|--|
| Emotion Network Select Network Modularity to Negative Correct Rejections |                  |               |             |           |          |  |
| <u>Variable</u>                                                          | <u>Condition</u> | <u>Gender</u> | <u>Mean</u> | <u>SD</u> | <u>N</u> |  |
| Emotion Network Select                                                   |                  | Female        | -0.0063     | 0.0043    | 49       |  |
| Network Modularity in the Theta                                          | DMT              | Male          | -0.0060     | 0.0046    | 37       |  |
| Frequency Band to Negative                                               |                  | Total         | -0.0062     | 0.0044    | 86       |  |
| Correct Rejections                                                       |                  | Female        | -0.0041     | 0.0047    | 38       |  |
|                                                                          | PST              | Male          | -0.0045     | 0.0045    | 36       |  |
|                                                                          |                  | Total         | -0.0134     | 0.0046    | 74       |  |
|                                                                          |                  | Female        | -0.0053     | 0.0046    | 87       |  |
|                                                                          | Total            | Male          | -0.0053     | 0.0046    | 73       |  |
|                                                                          |                  | Total         | -0.0053     | 0.0046    | 160      |  |
| Emotion Network Select                                                   |                  | Female        | -0.0013     | 0.0038    | 49       |  |
| Network Modularity in the Alpha                                          | DMT              | Male          | -0.0022     | 0.0047    | 37       |  |
| Frequency Band to Negative                                               |                  | Total         | -0.0017     | 0.0042    | 86       |  |
| Correct Rejections                                                       |                  | Female        | -0.0009     | 0.0051    | 38       |  |
|                                                                          | PST              | Male          | -0.0017     | 0.0039    | 36       |  |
|                                                                          |                  | Total         | -0.0013     | 0.0045    | 74       |  |
|                                                                          |                  | Female        | -0.0011     | 0.0044    | 87       |  |
|                                                                          | Total            | Male          | -0.0019     | 0.0047    | 73       |  |
|                                                                          |                  | Total         | -0.0015     | 0.0043    | 160      |  |
| Emotion Network Select                                                   |                  | Female        | -0.0006     | 0.0032    | 49       |  |
| Network Modularity in the Beta                                           | DMT              | Male          | -0.0012     | 0.0050    | 37       |  |
| Frequency Band to Negative                                               |                  | Total         | -0.0009     | 0.0041    | 86       |  |
| Correct Rejections                                                       |                  | Female        | -0.0010     | 0.0043    | 38       |  |
|                                                                          | PST              | Male          | -0.0005     | 0.0044    | 36       |  |
|                                                                          |                  | Total         | -0.0008     | 0.0044    | 74       |  |
|                                                                          |                  | Female        | -0.0008     | 0.0038    | 87       |  |
|                                                                          | Total            | Male          | -0.0009     | 0.0047    | 73       |  |
|                                                                          |                  | Total         | -0.0009     | 0.0042    | 160      |  |
| Emotion Network Select                                                   |                  | Female        | -0.0023     | 0.0041    | 49       |  |
| Network Modularity in the                                                | DMT              | Male          | -0.0028     | 0.0039    | 37       |  |
| Gamma Frequency Band to                                                  |                  | Total         | -0.0025     | 0.0040    | 86       |  |
| Negative Correct Rejections                                              |                  | Female        | -0.0013     | 0.0043    | 38       |  |
|                                                                          | PST              | Male          | -0.0021     | 0.0052    | 36       |  |
|                                                                          |                  | Total         | -0.0017     | 0.0047    | 74       |  |
|                                                                          |                  | Female        | -0.0019     | 0.0042    | 87       |  |
|                                                                          | Total            | Male          | -0.0024     | 0.0045    | 73       |  |
|                                                                          |                  | Total         | -0.0021     | 0.0044    | 160      |  |

Table 34

Table 35: Emotion Network Subnetwork Modularity to Negative Misses

| Table 35                                    |                  |               |             |           |          |  |
|---------------------------------------------|------------------|---------------|-------------|-----------|----------|--|
| Emotion Network Misses to Negative Feedback |                  |               |             |           |          |  |
| <u>Variable</u>                             | <u>Condition</u> | <u>Gender</u> | <u>Mean</u> | <u>SD</u> | <u>N</u> |  |
| Emotion Network Subnetwork                  |                  | Female        | 0.0882      | 0.0086    | 48       |  |
| Modularity in the Theta Frequency           | DMT              | Male          | 0.0875      | 0.0074    | 33       |  |
| Band to Negative Misses                     |                  | Total         | 0.0879      | 0.0081    | 81       |  |
|                                             |                  | Female        | 0.0890      | 0.0070    | 35       |  |
|                                             | PST              | Male          | 0.0866      | 0.0083    | 32       |  |
|                                             |                  | Total         | 0.0878      | 0.0085    | 67       |  |
|                                             |                  | Female        | 0.0885      | 0.0086    | 83       |  |
|                                             | Total            | Male          | 0.0870      | 0.0078    | 65       |  |
|                                             |                  | Total         | 0.0879      | 0.0083    | 148      |  |
|                                             |                  | Female        | 0.0931      | 0.0119    | 48       |  |
| Emotion Network Subnetwork                  |                  | Female        | 0.0931      | 0.0119    | 48       |  |
| Modularity in the Alpha Frequency           | DMT              | Male          | 0.0910      | 0.0117    | 33       |  |
| Band to Negative Misses                     |                  | Total         | 0.0923      | 0.0118    | 81       |  |
|                                             |                  | Female        | 0.0912      | 0.0115    | 35       |  |
|                                             | PST              | Male          | 0.0882      | 0.0115    | 32       |  |
|                                             |                  | Total         | 0.0898      | 0.0115    | 67       |  |
|                                             |                  | Female        | 0.0923      | 0.0117    | 83       |  |
|                                             | Total            | Male          | 0.0897      | 0.0116    | 65       |  |
|                                             |                  | Total         | 0.0911      | 0.0117    | 148      |  |
|                                             |                  | Female        | 0.1239      | 0.0110    | 48       |  |
| Emotion Network Subnetwork                  |                  | Female        | 0.1239      | 0.0110    | 48       |  |
| Modularity in the Beta Frequency Band       | DMT              | Male          | 0.1227      | 0.0116    | 33       |  |
| to Negative Misses                          |                  | Total         | 0.1234      | 0.0112    | 81       |  |
|                                             |                  | Female        | 0.1253      | 0.0131    | 35       |  |
|                                             | PST              | Male          | 0.1296      | 0.0154    | 32       |  |
|                                             |                  | Total         | 0.1273      | 0.0143    | 67       |  |
|                                             |                  | Female        | 0.1245      | 0.1187    | 83       |  |
|                                             | Total            | Male          | 0.1261      | 0.0139    | 65       |  |
|                                             |                  | Total         | 0.1252      | 0.0128    | 148      |  |
|                                             |                  | Female        | 0.0924      | 0.0153    | 48       |  |
| Emotion Network Subnetwork                  |                  | Female        | 0.0924      | 0.0153    | 48       |  |
| Modularity in the Gamma Frequency           | DMT              | Male          | 0.0903      | 0.0114    | 33       |  |
| Band to Negative Misses                     |                  | Total         | 0.0915      | 0.0138    | 81       |  |
|                                             |                  | Female        | 0.0916      | 0.0123    | 35       |  |
|                                             | PST              | Male          | 0.0856      | 0.0117    | 32       |  |
|                                             |                  | Total         | 0.0887      | 0.0123    | 67       |  |
|                                             |                  | Female        | 0.0921      | 0.0140    | 83       |  |
|                                             | Total            | Male          | 0.0880      | 0.0117    | 65       |  |
|                                             |                  | Total         | 0.0903      | 0.0132    | 148      |  |
|                                             |                  | Female        | 0.0921      | 0.0140    | 83       |  |

Table 35

Table 36: Emotion Network Select Network Modularity to Negative Misses

| Table 36                                    |                  |               |             |           |          |
|---------------------------------------------|------------------|---------------|-------------|-----------|----------|
| Emotion Network Misses to Negative Feedback |                  |               |             |           |          |
| <u>Variable</u>                             | <u>Condition</u> | <u>Gender</u> | <u>Mean</u> | <u>SD</u> | <u>N</u> |
| Emotion Network Select Network              | DMT              | Female        | -0.0033     | 0.0053    | 48       |
| Modularity in the Theta Frequency           |                  | Male          | -0.0031     | 0.0073    | 33       |
| Band to Negative Misses                     |                  | Total         | -0.0032     | 0.0061    | 81       |
|                                             | PST              | Female        | -0.0051     | 0.0056    | 35       |
|                                             |                  | Male          | -0.0044     | 0.0067    | 32       |
|                                             |                  | Total         | -0.0048     | 0.0074    | 67       |
|                                             | Total            | Female        | -0.0041     | 0.0066    | 83       |
|                                             |                  | Male          | -0.0037     | 0.0070    | 65       |
|                                             |                  | Total         | -0.0039     | 0.0068    | 148      |
| Emotion Network Select Network              | DMT              | Female        | -0.0011     | 0.0068    | 48       |
| Modularity in the Alpha Frequency           |                  | Male          | 0.0001      | 0.0063    | 33       |
| Band to Negative Misses                     |                  | Total         | -0.0006     | 0.0066    | 81       |
|                                             | PST              | Female        | -0.0010     | 0.0056    | 35       |
|                                             |                  | Male          | -0.0013     | 0.0061    | 32       |
|                                             |                  | Total         | -0.0012     | 0.0058    | 67       |
|                                             | Total            | Female        | -0.0011     | 0.0063    | 83       |
|                                             |                  | Male          | -0.0006     | 0.0062    | 65       |
|                                             |                  | Total         | -0.0009     | 0.0062    | 148      |
| Emotion Network Select Network              | DMT              | Female        | -0.0013     | 0.0058    | 48       |
| Modularity in the Beta Frequency Band       |                  | Male          | -0.0011     | 0.0059    | 33       |
| to Negative Misses                          |                  | Total         | -0.0012     | 0.0058    | 81       |
|                                             | PST              | Female        | -0.0008     | 0.0060    | 35       |
|                                             |                  | Male          | -0.0020     | 0.0052    | 32       |
|                                             |                  | Total         | -0.0013     | 0.0056    | 67       |
|                                             | Total            | Female        | -0.0011     | 0.0059    | 83       |
|                                             |                  | Male          | -0.0015     | 0.0056    | 65       |
|                                             |                  | Total         | -0.0013     | 0.0057    | 148      |
| Emotion Network Select Network              | DMT              | Female        | -0.0014     | 0.0062    | 48       |
| Modularity in the Gamma Frequency           |                  | Male          | -0.0007     | 0.0074    | 33       |
| Band to Negative Misses                     |                  | Total         | -0.0011     | 0.0067    | 81       |
|                                             | PST              | Female        | -0.0008     | 0.0070    | 35       |
|                                             |                  | Male          | -0.0017     | 0.0062    | 32       |
|                                             |                  | Total         | -0.0013     | 0.0066    | 67       |
|                                             | Total            | Female        | -0.0012     | 0.0066    | 83       |
|                                             |                  | Male          | -0.0012     | 0.0068    | 65       |
|                                             |                  | Total         | -0.0012     | 0.0066    | 148      |

Table 36

Table 37: Emotion Network Subnetwork Modularity to Positive Hits

| Table 37                                                                                 |           |        |        |        |        |    |  |
|------------------------------------------------------------------------------------------|-----------|--------|--------|--------|--------|----|--|
| Emotion Network Subnetwork Modularity to Positive Hits                                   |           |        |        |        |        |    |  |
| Variable                                                                                 | Condition | Gender | Mean   | SD     | N      |    |  |
| Emotion Network Subnetwork<br>Modularity in the Theta Frequency Band<br>to Positive Hits | DMT       | Female | 0.0878 | 0.0090 | 33     |    |  |
|                                                                                          |           | Male   | 0.0844 | 0.0115 | 28     |    |  |
|                                                                                          |           | Total  | 0.0862 | 0.0103 | 61     |    |  |
|                                                                                          |           | Female | 0.0864 | 0.0099 | 26     |    |  |
|                                                                                          |           | Male   | 0.0907 | 0.0101 | 26     |    |  |
|                                                                                          |           | Total  | 0.0885 | 0.0102 | 52     |    |  |
|                                                                                          | PST       | Female | 0.0872 | 0.0094 | 59     |    |  |
|                                                                                          |           | Male   | 0.0874 | 0.0112 | 54     |    |  |
|                                                                                          |           | Total  | 0.0873 | 0.0102 | 113    |    |  |
|                                                                                          |           | Total  | Female | 0.0912 | 0.0160 | 33 |  |
|                                                                                          |           |        | Male   | 0.0899 | 0.0152 | 28 |  |
|                                                                                          |           |        | Total  | 0.0906 | 0.0155 | 61 |  |
| Female                                                                                   | 0.0926    |        | 0.0114 | 26     |        |    |  |
| Male                                                                                     | 0.0877    |        | 0.0177 | 26     |        |    |  |
| Total                                                                                    | 0.0902    |        | 0.0150 | 52     |        |    |  |
| Emotion Network Subnetwork<br>Modularity in the Alpha Frequency Band<br>to Positive Hits | DMT       | Female | 0.0918 | 0.0141 | 59     |    |  |
|                                                                                          |           | Male   | 0.0889 | 0.0163 | 54     |    |  |
|                                                                                          |           | Total  | 0.0904 | 0.0152 | 113    |    |  |
|                                                                                          |           | PST    | Female | 0.0895 | 0.0077 | 33 |  |
|                                                                                          |           |        | Male   | 0.0910 | 0.0070 | 28 |  |
|                                                                                          |           |        | Total  | 0.0902 | 0.0073 | 61 |  |
|                                                                                          | Female    |        | 0.0900 | 0.0100 | 26     |    |  |
|                                                                                          | Male      |        | 0.0907 | 0.0099 | 26     |    |  |
|                                                                                          | Total     |        | 0.0904 | 0.0099 | 52     |    |  |
|                                                                                          | Total     | Female | 0.0897 | 0.0087 | 59     |    |  |
|                                                                                          |           | Male   | 0.0909 | 0.0085 | 54     |    |  |
|                                                                                          |           | Total  | 0.0903 | 0.0086 | 113    |    |  |
| DMT                                                                                      |           | Female | 0.0865 | 0.0112 | 33     |    |  |
|                                                                                          |           | Male   | 0.0865 | 0.0125 | 28     |    |  |
|                                                                                          |           | Total  | 0.0865 | 0.0117 | 61     |    |  |
|                                                                                          | Female    | 0.0903 | 0.0106 | 26     |        |    |  |
|                                                                                          | Male      | 0.0903 | 0.0137 | 26     |        |    |  |
|                                                                                          | Total     | 0.0903 | 0.0121 | 52     |        |    |  |
| PST                                                                                      | Female    | 0.0882 | 0.0111 | 59     |        |    |  |
|                                                                                          | Male      | 0.0883 | 0.0131 | 54     |        |    |  |
|                                                                                          | Total     | 0.0882 | 0.0120 | 113    |        |    |  |

Table 37



Table 38: Emotion Network Select Network Modularity to Positive Hits

| Table 38                                                                               |                                                                                        |               |             |           |          |    |
|----------------------------------------------------------------------------------------|----------------------------------------------------------------------------------------|---------------|-------------|-----------|----------|----|
| Emotion Network Select Network Modularity to Positive Hits                             |                                                                                        |               |             |           |          |    |
| <u>Variable</u>                                                                        | <u>Condition</u>                                                                       | <u>Gender</u> | <u>Mean</u> | <u>SD</u> | <u>N</u> |    |
| Emotion Network Select Network Modularity in the Theta Frequency Band to Positive Hits | DMT                                                                                    | Female        | 0.0065      | -0.0006   | 33       |    |
|                                                                                        |                                                                                        | Male          | -0.0036     | 0.0069    | 28       |    |
|                                                                                        |                                                                                        | Total         | -0.0020     | 0.0067    | 61       |    |
|                                                                                        | PST                                                                                    | Female        | -0.0022     | 0.0069    | 26       |    |
|                                                                                        |                                                                                        | Male          | -0.0032     | 0.0077    | 26       |    |
|                                                                                        |                                                                                        | Total         | -0.0028     | 0.0072    | 53       |    |
|                                                                                        | Total                                                                                  | Female        | -0.0013     | 0.0067    | 59       |    |
|                                                                                        |                                                                                        | Male          | -0.0034     | 0.0072    | 54       |    |
|                                                                                        |                                                                                        | Total         | -0.0023     | 0.0070    | 113      |    |
|                                                                                        | Emotion Network Select Network Modularity in the Alpha Frequency Band to Positive Hits | DMT           | Female      | 0.0000    | 0.0070   | 33 |
|                                                                                        |                                                                                        |               | Male        | -0.0017   | 0.0060   | 28 |
|                                                                                        |                                                                                        |               | Total       | -0.0008   | 0.0066   | 61 |
| PST                                                                                    |                                                                                        | Female        | 0.0004      | 0.0062    | 26       |    |
|                                                                                        |                                                                                        | Male          | -0.0014     | 0.0057    | 26       |    |
|                                                                                        |                                                                                        | Total         | -0.0005     | 0.0060    | 53       |    |
| Total                                                                                  |                                                                                        | Female        | 0.0002      | 0.0067    | 59       |    |
|                                                                                        |                                                                                        | Male          | -0.0015     | 0.0058    | 54       |    |
|                                                                                        |                                                                                        | Total         | -0.0006     | 0.0063    | 113      |    |
| Emotion Network Select Network Modularity in the Beta Frequency Band to Positive Hits  |                                                                                        | DMT           | Female      | -0.0002   | 0.0069   | 33 |
|                                                                                        |                                                                                        |               | Male        | -0.0007   | 0.0046   | 28 |
|                                                                                        |                                                                                        |               | Total       | -0.0004   | 0.0058   | 61 |
|                                                                                        | PST                                                                                    | Female        | 0.0006      | 0.0050    | 26       |    |
|                                                                                        |                                                                                        | Male          | 0.0016      | 0.0056    | 26       |    |
|                                                                                        |                                                                                        | Total         | 0.0011      | 0.0053    | 53       |    |
|                                                                                        | Total                                                                                  | Female        | 0.0002      | 0.0061    | 59       |    |
|                                                                                        |                                                                                        | Male          | 0.0004      | 0.0051    | 54       |    |
|                                                                                        |                                                                                        | Total         | 0.0002      | 0.0056    | 113      |    |
|                                                                                        | Emotion Network Select Network Modularity in the Gamma Frequency Band to Positive Hits | DMT           | Female      | -0.0017   | 0.0064   | 33 |
|                                                                                        |                                                                                        |               | Male        | -0.0037   | 0.0065   | 28 |
|                                                                                        |                                                                                        |               | Total       | -0.0027   | 0.0065   | 61 |
| PST                                                                                    |                                                                                        | Female        | 0.0003      | 0.0060    | 26       |    |
|                                                                                        |                                                                                        | Male          | -0.0011     | 0.0086    | 26       |    |
|                                                                                        |                                                                                        | Total         | -0.0004     | 0.0073    | 53       |    |
| Total                                                                                  |                                                                                        | Female        | -0.0008     | 0.0062    | 59       |    |
|                                                                                        |                                                                                        | Male          | -0.0025     | 0.0076    | 54       |    |
|                                                                                        |                                                                                        | Total         | -0.0016     | 0.0069    | 113      |    |

Table 38

Table 39: Emotion Network Subnetwork Modularity to Positive False Alarms

| Table 39                                                       |                  |               |             |           |          |  |
|----------------------------------------------------------------|------------------|---------------|-------------|-----------|----------|--|
| Emotion Network Subnetwork Modularity to Positive False Alarms |                  |               |             |           |          |  |
| <u>Variable</u>                                                | <u>Condition</u> | <u>Gender</u> | <u>Mean</u> | <u>SD</u> | <u>N</u> |  |
| Emotion Network Subnetwork                                     |                  | Female        | 0.0899      | 0.0069    | 49       |  |
| Modularity in the Theta                                        | DMT              | Male          | 0.0896      | 0.0067    | 37       |  |
| Frequency Band to Positive                                     |                  | Total         | 0.0897      | 0.0068    | 86       |  |
| False Alarms                                                   |                  | Female        | 0.0890      | 0.0065    | 38       |  |
|                                                                | PST              | Male          | 0.0883      | 0.0065    | 35       |  |
|                                                                |                  | Total         | 0.0887      | 0.0064    | 73       |  |
|                                                                |                  | Female        | 0.0895      | 0.0067    | 87       |  |
|                                                                | Total            | Male          | 0.0890      | 0.0066    | 72       |  |
|                                                                |                  | Total         | 0.0893      | 0.0066    | 159      |  |
| Emotion Network Subnetwork                                     |                  | Female        | 0.0907      | 0.0097    | 49       |  |
| Modularity in the Alpha                                        | DMT              | Male          | 0.0917      | 0.0110    | 37       |  |
| Frequency Band to Positive                                     |                  | Total         | 0.0912      | 0.0102    | 86       |  |
| False Alarms                                                   |                  | Female        | 0.0936      | 0.0093    | 38       |  |
|                                                                | PST              | Male          | 0.0928      | 0.0106    | 35       |  |
|                                                                |                  | Total         | 0.0932      | 0.0099    | 73       |  |
|                                                                |                  | Female        | 0.0920      | 0.0096    | 87       |  |
|                                                                | Total            | Male          | 0.0922      | 0.0108    | 72       |  |
|                                                                |                  | Total         | 0.0921      | 0.0101    | 159      |  |
| Emotion Network Subnetwork                                     |                  | Female        | 0.0908      | 0.0079    | 49       |  |
| Modularity in the Beta                                         | DMT              | Male          | 0.0898      | 0.0081    | 37       |  |
| Frequency Band to Positive                                     |                  | Total         | 0.0904      | 0.0079    | 86       |  |
| False Alarms                                                   |                  | Female        | 0.0906      | 0.0090    | 38       |  |
|                                                                | PST              | Male          | 0.0912      | 0.0091    | 35       |  |
|                                                                |                  | Total         | 0.0908      | 0.0090    | 73       |  |
|                                                                |                  | Female        | 0.0907      | 0.0083    | 87       |  |
|                                                                | Total            | Male          | 0.0905      | 0.0085    | 72       |  |
|                                                                |                  | Total         | 0.0906      | 0.0084    | 159      |  |
| Emotion Network Subnetwork                                     |                  | Female        | 0.0925      | 0.0092    | 49       |  |
| Modularity in the Gamma                                        | DMT              | Male          | 0.0915      | 0.0089    | 37       |  |
| Frequency Band to Positive                                     |                  | Total         | 0.0921      | 0.0090    | 86       |  |
| False Alarms                                                   |                  | Female        | 0.0928      | 0.0094    | 38       |  |
|                                                                | PST              | Male          | 0.0929      | 0.0082    | 35       |  |
|                                                                |                  | Total         | 0.0929      | 0.0088    | 73       |  |
|                                                                |                  | Female        | 0.0926      | 0.0092    | 87       |  |
|                                                                | Total            | Male          | 0.0922      | 0.0085    | 72       |  |
|                                                                |                  | Total         | 0.0925      | 0.0089    | 159      |  |

Table 39

Table 40: Emotion Network Select Network Modularity to Positive False Alarms

| Table 40                                                                                       |                  |               |             |           |          |
|------------------------------------------------------------------------------------------------|------------------|---------------|-------------|-----------|----------|
| Emotion Network Select Network Modularity to Positive False Alarms                             |                  |               |             |           |          |
| <u>Variable</u>                                                                                | <u>Condition</u> | <u>Gender</u> | <u>Mean</u> | <u>SD</u> | <u>N</u> |
| Emotion Network Select Network Modularity in the Theta Frequency Band to Positive False Alarms | DMT              | Female        | -0.0063     | 0.0066    | 49       |
|                                                                                                |                  | Male          | -0.0076     | 0.0063    | 37       |
|                                                                                                |                  | Total         | -0.0069     | 0.0064    | 86       |
|                                                                                                | PST              | Female        | -0.0046     | 0.0054    | 38       |
|                                                                                                |                  | Male          | -0.0049     | 0.0054    | 35       |
|                                                                                                |                  | Total         | -0.0048     | 0.0054    | 73       |
|                                                                                                | Total            | Female        | 0.0056      | 0.0061    | 87       |
|                                                                                                |                  | Male          | -0.0063     | 0.0060    | 72       |
|                                                                                                |                  | Total         | -0.0059     | 0.0061    | 159      |
| Emotion Network Select Network Modularity in the Alpha Frequency Band to Positive False Alarms | DMT              | Female        | -0.0018     | 0.0048    | 49       |
|                                                                                                |                  | Male          | -0.0017     | 0.0054    | 37       |
|                                                                                                |                  | Total         | -0.0017     | 0.0051    | 86       |
|                                                                                                | PST              | Female        | -0.0021     | 0.0058    | 38       |
|                                                                                                |                  | Male          | -0.0004     | 0.0051    | 35       |
|                                                                                                |                  | Total         | -0.0013     | 0.0055    | 73       |
|                                                                                                | Total            | Female        | -0.0019     | 0.0052    | 87       |
|                                                                                                |                  | Male          | -0.0011     | 0.0053    | 72       |
|                                                                                                |                  | Total         | -0.0015     | 0.0053    | 159      |
| Emotion Network Select Network Modularity in the Beta Frequency Band to Positive False Alarms  | DMT              | Female        | -0.0018     | 0.0043    | 49       |
|                                                                                                |                  | Male          | -0.0013     | 0.0040    | 37       |
|                                                                                                |                  | Total         | -0.0016     | 0.0041    | 86       |
|                                                                                                | PST              | Female        | -0.0010     | 0.0049    | 38       |
|                                                                                                |                  | Male          | 0.0001      | 0.0045    | 35       |
|                                                                                                |                  | Total         | -0.0005     | 0.0047    | 73       |
|                                                                                                | Total            | Female        | -0.0015     | 0.0045    | 87       |
|                                                                                                |                  | Male          | -0.0006     | 0.0043    | 72       |
|                                                                                                |                  | Total         | -0.0011     | 0.0044    | 159      |
| Emotion Network Select Network Modularity in the Gamma Frequency Band to Positive False Alarms | DMT              | Female        | -0.0032     | 0.0048    | 49       |
|                                                                                                |                  | Male          | -0.0027     | 0.0062    | 37       |
|                                                                                                |                  | Total         | -0.0030     | 0.0054    | 86       |
|                                                                                                | PST              | Female        | -0.0031     | 0.0054    | 38       |
|                                                                                                |                  | Male          | -0.0010     | 0.0055    | 35       |
|                                                                                                |                  | Total         | -0.0021     | 0.0055    | 73       |
|                                                                                                | Total            | Female        | -0.0031     | 0.0050    | 87       |
|                                                                                                |                  | Male          | -0.0019     | 0.0059    | 72       |
|                                                                                                |                  | Total         | -0.0026     | 0.0054    | 159      |

Table 40

Table 41: Emotion Network Subnetwork Modularity to Positive Correct Rejections

| Table 41                                                                                                               |                                                                                                                        |        |        |        |        |    |  |
|------------------------------------------------------------------------------------------------------------------------|------------------------------------------------------------------------------------------------------------------------|--------|--------|--------|--------|----|--|
| Emotion Network Subnetwork Modularity to Correct Rejections for Positive Feedback                                      |                                                                                                                        |        |        |        |        |    |  |
| Variable                                                                                                               | Condition                                                                                                              | Gender | Mean   | SD     | N      |    |  |
| Emotion Network Subnetwork<br>Modularity in the Theta Frequency<br>Band to Correct Rejections for<br>Positive Feedback | DMT                                                                                                                    | Female | 0.0907 | 0.0061 | 49     |    |  |
|                                                                                                                        |                                                                                                                        | Male   | 0.0884 | 0.0054 | 37     |    |  |
|                                                                                                                        |                                                                                                                        | Total  | 0.0897 | 0.0059 | 86     |    |  |
|                                                                                                                        | PST                                                                                                                    | Female | 0.0912 | 0.0072 | 38     |    |  |
|                                                                                                                        |                                                                                                                        | Male   | 0.0897 | 0.0058 | 35     |    |  |
|                                                                                                                        |                                                                                                                        | Total  | 0.0905 | 0.0066 | 73     |    |  |
|                                                                                                                        | Total                                                                                                                  | Female | 0.0909 | 0.0066 | 87     |    |  |
|                                                                                                                        |                                                                                                                        | Male   | 0.0891 | 0.0056 | 72     |    |  |
|                                                                                                                        |                                                                                                                        | Total  | 0.0901 | 0.0062 | 159    |    |  |
|                                                                                                                        | Emotion Network Subnetwork<br>Modularity in the Alpha Frequency<br>Band to Correct Rejections for<br>Positive Feedback | DMT    | Female | 0.0914 | 0.0088 | 49 |  |
|                                                                                                                        |                                                                                                                        |        | Male   | 0.0904 | 0.0083 | 37 |  |
|                                                                                                                        |                                                                                                                        |        | Total  | 0.0909 | 0.0085 | 86 |  |
|                                                                                                                        |                                                                                                                        | PST    | Female | 0.0918 | 0.0095 | 38 |  |
|                                                                                                                        |                                                                                                                        |        | Male   | 0.0907 | 0.0108 | 35 |  |
|                                                                                                                        |                                                                                                                        |        | Total  | 0.0913 | 0.0101 | 73 |  |
| Total                                                                                                                  |                                                                                                                        | Female | 0.0916 | 0.0090 | 87     |    |  |
|                                                                                                                        |                                                                                                                        | Male   | 0.0905 | 0.0095 | 73     |    |  |
|                                                                                                                        |                                                                                                                        | Total  | 0.0911 | 0.0092 | 159    |    |  |
| Emotion Network Subnetwork<br>Modularity in the Beta Frequency<br>Band to Correct Rejections for<br>Positive Feedback  |                                                                                                                        | DMT    | Female | 0.0911 | 0.0096 | 49 |  |
|                                                                                                                        |                                                                                                                        |        | Male   | 0.0908 | 0.0086 | 37 |  |
|                                                                                                                        |                                                                                                                        |        | Total  | 0.0909 | 0.0091 | 86 |  |
|                                                                                                                        |                                                                                                                        | PST    | Female | 0.0925 | 0.0084 | 38 |  |
|                                                                                                                        |                                                                                                                        |        | Male   | 0.0902 | 0.0076 | 35 |  |
|                                                                                                                        |                                                                                                                        |        | Total  | 0.0914 | 0.0081 | 73 |  |
|                                                                                                                        | Total                                                                                                                  | Female | 0.0917 | 0.0091 | 87     |    |  |
|                                                                                                                        |                                                                                                                        | Male   | 0.0905 | 0.0081 | 73     |    |  |
|                                                                                                                        |                                                                                                                        | Total  | 0.0912 | 0.0086 | 159    |    |  |
|                                                                                                                        | Emotion Network Subnetwork<br>Modularity in the Gamma Frequency<br>Band to Correct Rejections for<br>Positive Feedback | DMT    | Female | 0.0928 | 0.0088 | 49 |  |
|                                                                                                                        |                                                                                                                        |        | Male   | 0.0897 | 0.0084 | 37 |  |
|                                                                                                                        |                                                                                                                        |        | Total  | 0.0915 | 0.0087 | 86 |  |
|                                                                                                                        |                                                                                                                        | PST    | Female | 0.0946 | 0.0090 | 38 |  |
|                                                                                                                        |                                                                                                                        |        | Male   | 0.0908 | 0.0092 | 35 |  |
|                                                                                                                        |                                                                                                                        |        | Total  | 0.0928 | 0.0092 | 73 |  |
| Total                                                                                                                  |                                                                                                                        | Female | 0.0936 | 0.0089 | 87     |    |  |
|                                                                                                                        |                                                                                                                        | Male   | 0.0903 | 0.0087 | 72     |    |  |
|                                                                                                                        |                                                                                                                        | Total  | 0.0921 | 0.0089 | 159    |    |  |

Table 41

Table 42: Emotion Network Select Network Modularity to Positive Correct Rejections

| Table 42                                                                                                          |                                                                                                                   |               |             |           |          |    |
|-------------------------------------------------------------------------------------------------------------------|-------------------------------------------------------------------------------------------------------------------|---------------|-------------|-----------|----------|----|
| Emotion Network Select Network Modularity to Correct Rejections for Positive Feedback                             |                                                                                                                   |               |             |           |          |    |
| <u>Variable</u>                                                                                                   | <u>Condition</u>                                                                                                  | <u>Gender</u> | <u>Mean</u> | <u>SD</u> | <u>N</u> |    |
| Emotion Network Select Network Modularity in the Theta Frequency Band to Correct Rejections for Positive Feedback | DMT                                                                                                               | Female        | -0.0048     | 0.0056    | 49       |    |
|                                                                                                                   |                                                                                                                   | Male          | -0.0059     | 0.0057    | 37       |    |
|                                                                                                                   |                                                                                                                   | Total         | -0.0052     | 0.0056    | 86       |    |
|                                                                                                                   | PST                                                                                                               | Female        | -0.0037     | 0.0055    | 38       |    |
|                                                                                                                   |                                                                                                                   | Male          | -0.0052     | 0.0054    | 35       |    |
|                                                                                                                   |                                                                                                                   | Total         | -0.0044     | 0.0055    | 73       |    |
|                                                                                                                   | Total                                                                                                             | Female        | -0.0043     | 0.0055    | 87       |    |
|                                                                                                                   |                                                                                                                   | Male          | -0.0056     | 0.0055    | 72       |    |
|                                                                                                                   |                                                                                                                   | Total         | -0.0049     | 0.0055    | 159      |    |
|                                                                                                                   | Emotion Network Select Network Modularity in the Alpha Frequency Band to Correct Rejections for Positive Feedback | DMT           | Female      | -0.0008   | 0.0039   | 49 |
|                                                                                                                   |                                                                                                                   |               | Male        | -0.0019   | 0.0043   | 37 |
|                                                                                                                   |                                                                                                                   |               | Total       | -0.0013   | 0.0041   | 86 |
| PST                                                                                                               |                                                                                                                   | Female        | -0.0013     | 0.0036    | 38       |    |
|                                                                                                                   |                                                                                                                   | Male          | -0.0010     | 0.0045    | 35       |    |
|                                                                                                                   |                                                                                                                   | Total         | -0.0011     | 0.0055    | 73       |    |
| Total                                                                                                             |                                                                                                                   | Female        | -0.0010     | 0.0038    | 87       |    |
|                                                                                                                   |                                                                                                                   | Male          | -0.0015     | 0.0044    | 72       |    |
|                                                                                                                   |                                                                                                                   | Total         | -0.0012     | 0.0040    | 159      |    |
| Emotion Network Select Network Modularity in the Beta Frequency Band to Correct Rejections for Positive Feedback  |                                                                                                                   | DMT           | Female      | 0.0001    | 0.0032   | 49 |
|                                                                                                                   |                                                                                                                   |               | Male        | -0.0011   | 0.0040   | 37 |
|                                                                                                                   |                                                                                                                   |               | Total       | -0.0004   | 0.0036   | 86 |
|                                                                                                                   | PST                                                                                                               | Female        | -0.0010     | 0.0045    | 38       |    |
|                                                                                                                   |                                                                                                                   | Male          | 0.0003      | 0.0043    | 35       |    |
|                                                                                                                   |                                                                                                                   | Total         | -0.0004     | 0.0045    | 73       |    |
|                                                                                                                   | Total                                                                                                             | Female        | -0.0004     | 0.0039    | 87       |    |
|                                                                                                                   |                                                                                                                   | Male          | -0.0004     | 0.0042    | 72       |    |
|                                                                                                                   |                                                                                                                   | Total         | -0.0004     | 0.0040    | 159      |    |
|                                                                                                                   | Emotion Network Select Network Modularity in the Gamma Frequency Band to Correct Rejections for Positive Feedback | DMT           | Female      | -0.0012   | -0.0039  | 49 |
|                                                                                                                   |                                                                                                                   |               | Male        | -0.0023   | 0.0050   | 37 |
|                                                                                                                   |                                                                                                                   |               | Total       | -0.0017   | 0.0044   | 86 |
| PST                                                                                                               |                                                                                                                   | Female        | -0.0011     | 0.0044    | 38       |    |
|                                                                                                                   |                                                                                                                   | Male          | -0.0001     | 0.0044    | 35       |    |
|                                                                                                                   |                                                                                                                   | Total         | -0.0006     | 0.0044    | 73       |    |
| Total                                                                                                             |                                                                                                                   | Female        | -0.0012     | 0.0041    | 87       |    |
|                                                                                                                   |                                                                                                                   | Male          | -0.0012     | 0.0048    | 72       |    |
|                                                                                                                   |                                                                                                                   | Total         | -0.0012     | 0.0044    | 159      |    |

Table 42

Table 43: Emotion Network Subnetwork Modularity to Positive Misses

| Table 43                                                                                   |                                                                                            |        |        |        |        |    |  |
|--------------------------------------------------------------------------------------------|--------------------------------------------------------------------------------------------|--------|--------|--------|--------|----|--|
| Emotion Network Misses to Positive Feedback                                                |                                                                                            |        |        |        |        |    |  |
| Variable                                                                                   | Condition                                                                                  | Gender | Mean   | SD     | N      |    |  |
| Emotion Network Subnetwork<br>Modularity in the Theta Frequency Band<br>to Positive Misses | DMT                                                                                        | Female | 0.0894 | 0.0083 | 41     |    |  |
|                                                                                            |                                                                                            | Male   | 0.0868 | 0.0083 | 35     |    |  |
|                                                                                            |                                                                                            | Total  | 0.0882 | 0.0083 | 76     |    |  |
|                                                                                            | PST                                                                                        | Female | 0.0887 | 0.0082 | 34     |    |  |
|                                                                                            |                                                                                            | Male   | 0.0862 | 0.0073 | 31     |    |  |
|                                                                                            |                                                                                            | Total  | 0.0875 | 0.0078 | 65     |    |  |
|                                                                                            | Total                                                                                      | Female | 0.0891 | 0.0082 | 75     |    |  |
|                                                                                            |                                                                                            | Male   | 0.0865 | 0.0078 | 66     |    |  |
|                                                                                            |                                                                                            | Total  | 0.0879 | 0.0081 | 141    |    |  |
|                                                                                            | Emotion Network Subnetwork<br>Modularity in the Alpha Frequency Band<br>to Positive Misses | DMT    | Female | 0.0906 | 0.0127 | 41 |  |
|                                                                                            |                                                                                            |        | Male   | 0.0869 | 0.0106 | 35 |  |
|                                                                                            |                                                                                            |        | Total  | 0.0889 | 0.0119 | 76 |  |
|                                                                                            |                                                                                            | PST    | Female | 0.0912 | 0.0105 | 34 |  |
|                                                                                            |                                                                                            |        | Male   | 0.0883 | 0.0121 | 31 |  |
| Total                                                                                      |                                                                                            |        | 0.0898 | 0.0113 | 65     |    |  |
| Total                                                                                      |                                                                                            | Female | 0.0909 | 0.0117 | 75     |    |  |
|                                                                                            |                                                                                            | Male   | 0.0876 | 0.0113 | 66     |    |  |
|                                                                                            |                                                                                            | Total  | 0.0893 | 0.0116 | 141    |    |  |
| Emotion Network Subnetwork<br>Modularity in the Beta Frequency Band<br>to Positive Misses  |                                                                                            | DMT    | Female | 0.0904 | 0.0083 | 41 |  |
|                                                                                            |                                                                                            |        | Male   | 0.0879 | 0.0070 | 35 |  |
|                                                                                            |                                                                                            |        | Total  | 0.0893 | 0.0078 | 76 |  |
|                                                                                            |                                                                                            | PST    | Female | 0.0901 | 0.0095 | 34 |  |
|                                                                                            |                                                                                            |        | Male   | 0.0877 | 0.0101 | 31 |  |
|                                                                                            | Total                                                                                      |        | 0.0889 | 0.0098 | 65     |    |  |
|                                                                                            | Total                                                                                      | Female | 0.0903 | 0.0088 | 75     |    |  |
|                                                                                            |                                                                                            | Male   | 0.0878 | 0.0085 | 66     |    |  |
|                                                                                            |                                                                                            | Total  | 0.0891 | 0.0087 | 141    |    |  |
|                                                                                            | Emotion Network Subnetwork<br>Modularity in the Gamma Frequency<br>Band to Positive Misses | DMT    | Female | 0.0936 | 0.0128 | 41 |  |
|                                                                                            |                                                                                            |        | Male   | 0.0897 | 0.0101 | 35 |  |
|                                                                                            |                                                                                            |        | Total  | 0.0918 | 0.0117 | 76 |  |
|                                                                                            |                                                                                            | PST    | Female | 0.0883 | 0.0100 | 34 |  |
|                                                                                            |                                                                                            |        | Male   | 0.0881 | 0.0142 | 31 |  |
| Total                                                                                      |                                                                                            |        | 0.0882 | 0.0121 | 65     |    |  |
| Total                                                                                      |                                                                                            | Female | 0.0912 | 0.0119 | 75     |    |  |
|                                                                                            |                                                                                            | Male   | 0.0890 | 0.0121 | 66     |    |  |
|                                                                                            |                                                                                            | Total  | 0.0901 | 0.0120 | 141    |    |  |

Table 43

Table 44: Emotion Network Select Network Modularity to Positive Misses

| Table 44                                                                                       |                                                                                                |               |             |           |          |    |  |
|------------------------------------------------------------------------------------------------|------------------------------------------------------------------------------------------------|---------------|-------------|-----------|----------|----|--|
| Emotion Network Misses to Positive Feedback                                                    |                                                                                                |               |             |           |          |    |  |
| <u>Variable</u>                                                                                | <u>Condition</u>                                                                               | <u>Gender</u> | <u>Mean</u> | <u>SD</u> | <u>N</u> |    |  |
| Emotion Network Select Network<br>Modularity in the Theta Frequency Band<br>to Positive Misses | DMT                                                                                            | Female        | -0.0042     | 0.0067    | 41       |    |  |
|                                                                                                |                                                                                                | Male          | -0.0043     | 0.0085    | 35       |    |  |
|                                                                                                |                                                                                                | Total         | -0.0043     | 0.0075    | 76       |    |  |
|                                                                                                | PST                                                                                            | Female        | -0.0036     | 0.0075    | 34       |    |  |
|                                                                                                |                                                                                                | Male          | -0.0031     | 0.0072    | 31       |    |  |
|                                                                                                |                                                                                                | Total         | -0.0034     | 0.0073    | 65       |    |  |
|                                                                                                | Total                                                                                          | Female        | -0.0039     | 0.0071    | 75       |    |  |
|                                                                                                |                                                                                                | Male          | -0.0038     | 0.0078    | 66       |    |  |
|                                                                                                |                                                                                                | Total         | -0.0039     | 0.0074    | 141      |    |  |
|                                                                                                | Emotion Network Select Network<br>Modularity in the Alpha Frequency Band<br>to Positive Misses | DMT           | Female      | -0.0005   | 0.0063   | 41 |  |
|                                                                                                |                                                                                                |               | Male        | -0.0013   | 0.0074   | 35 |  |
|                                                                                                |                                                                                                |               | Total       | -0.0009   | 0.0068   | 76 |  |
|                                                                                                |                                                                                                | PST           | Female      | 0.0012    | 0.0061   | 34 |  |
|                                                                                                |                                                                                                |               | Male        | -0.0009   | 0.0057   | 31 |  |
| Total                                                                                          |                                                                                                |               | 0.0002      | 0.0060    | 65       |    |  |
| Total                                                                                          |                                                                                                | Female        | 0.0003      | 0.0062    | 75       |    |  |
|                                                                                                |                                                                                                | Male          | -0.0011     | 0.0066    | 66       |    |  |
|                                                                                                |                                                                                                | Total         | -0.0004     | 0.0064    | 141      |    |  |
| Emotion Network Select Network<br>Modularity in the Beta Frequency Band<br>to Positive Misses  |                                                                                                | DMT           | Female      | -0.0005   | 0.0062   | 41 |  |
|                                                                                                |                                                                                                |               | Male        | 0.0004    | 0.0051   | 35 |  |
|                                                                                                |                                                                                                |               | Total       | -0.0001   | 0.0057   | 76 |  |
|                                                                                                |                                                                                                | PST           | Female      | -0.0006   | 0.0056   | 34 |  |
|                                                                                                |                                                                                                |               | Male        | -0.0016   | 0.0063   | 31 |  |
|                                                                                                | Total                                                                                          |               | -0.0011     | 0.0059    | 65       |    |  |
|                                                                                                | Total                                                                                          | Female        | -0.0006     | 0.0059    | 75       |    |  |
|                                                                                                |                                                                                                | Male          | -0.0005     | 0.0057    | 66       |    |  |
|                                                                                                |                                                                                                | Total         | -0.0006     | 0.0058    | 141      |    |  |
|                                                                                                | Emotion Network Select Network<br>Modularity in the Gamma Frequency<br>Band to Positive Misses | DMT           | Female      | -0.0009   | 0.0060   | 41 |  |
|                                                                                                |                                                                                                |               | Male        | 0.0007    | 0.0060   | 35 |  |
|                                                                                                |                                                                                                |               | Total       | -0.0001   | 0.0060   | 76 |  |
|                                                                                                |                                                                                                | PST           | Female      | -0.0011   | 0.0053   | 34 |  |
|                                                                                                |                                                                                                |               | Male        | -0.0019   | 0.0084   | 31 |  |
| Total                                                                                          |                                                                                                |               | -0.0015     | 0.0069    | 65       |    |  |
| Total                                                                                          |                                                                                                | Female        | -0.0010     | 0.0057    | 75       |    |  |
|                                                                                                |                                                                                                | Male          | -0.0005     | 0.0073    | 66       |    |  |
|                                                                                                |                                                                                                | Total         | -0.0008     | 0.0064    | 141      |    |  |

Table 44

Table 45: Summary of Correlations between Emotion and Semantic Memory Network Select Network Modularity for Positive Correct Rejections

| Table 45                                                                                                                |        |        |        |       |        |        |        |      |
|-------------------------------------------------------------------------------------------------------------------------|--------|--------|--------|-------|--------|--------|--------|------|
| Summary of Correlations between Emotion and Semantic Memory Network Selected Modularity for Positive Correct Rejections |        |        |        |       |        |        |        |      |
| Measure                                                                                                                 | 1      | 2      | 3      | 4     | 5      | 6      | 7      | 8    |
| 1. Emotion Network Selected Modularity for Positive Correct Rejections in the Theta Frequency Band                      | 1.00   |        |        |       |        |        |        |      |
| 2. Emotion Network Selected Modularity for Positive Correct Rejections in the Alpha Frequency Band                      | 0.24** | 1.00   |        |       |        |        |        |      |
| 3. Emotion Network Selected Modularity for Positive Correct Rejections in the Beta Frequency Band                       | 0.34** | 0.53** | 1.00   |       |        |        |        |      |
| 4. Emotion Network Selected Modularity for Positive Correct Rejections in the Gamma Frequency Band                      | 0.41** | 0.45** | 0.43** | 1.00  |        |        |        |      |
| 5. Semantic Memory Network Selected Modularity for Positive Correct Rejections in the Theta Frequency Band              | -0.03  | 0.24** | 0.12   | 0.09  | 1.00   |        |        |      |
| 6. Semantic Memory Network Selected Modularity for Positive Correct Rejections in the Alpha Frequency Band              | -0.08  | -0.19* | -0.12  | -0.03 | 0.07   | 1.00   |        |      |
| 7. Semantic Memory Network Selected Modularity for Positive Correct Rejections in the Beta Frequency Band               | 0.12   | -0.09  | 0.00   | 0.03  | 0.11   | 0.45** | 1.00   |      |
| 8. Semantic Memory Network Selected Modularity for Positive Correct Rejections in the Gamma Frequency Band              | 0.11   | 0.10   | -0.14  | -0.03 | 0.23** | 0.46** | 0.39** | 1.00 |
| Note.                                                                                                                   |        |        |        |       |        |        |        |      |
| **. Correlation is significant at the 0.01 level (2-tailed).                                                            |        |        |        |       |        |        |        |      |
| *. Correlation is significant at the 0.05 level (2-tailed).                                                             |        |        |        |       |        |        |        |      |
| Table 45                                                                                                                |        |        |        |       |        |        |        |      |



Table 46: Summary of Correlations between Emotion and Semantic Memory Network Subnetwork Modularity for Positive Correct Rejections

| Table 46                                                                                                                  |        |        |        |       |       |        |        |      |
|---------------------------------------------------------------------------------------------------------------------------|--------|--------|--------|-------|-------|--------|--------|------|
| Summary of Correlations between Emotion and Semantic Memory Network Subnetwork Modularity for Positive Correct Rejections |        |        |        |       |       |        |        |      |
| Measure                                                                                                                   | 1      | 2      | 3      | 4     | 5     | 6      | 7      | 8    |
| 1. Emotion Network Subnetwork Modularity for Positive Correct Rejections in the Theta Frequency Band                      | 1.00   |        |        |       |       |        |        |      |
| 2. Emotion Network Subnetwork Modularity for Positive Correct Rejections in the Alpha Frequency Band                      | 0.55** | 1.00   |        |       |       |        |        |      |
| 3. Emotion Network Subnetwork Modularity for Positive Correct Rejections in the Beta Frequency Band                       | 0.47** | 0.59** | 1.00   |       |       |        |        |      |
| 4. Emotion Network Subnetwork Modularity for Positive Correct Rejections in the Gamma Frequency Band                      | 0.68** | 0.67** | 0.53** | 1.00  |       |        |        |      |
| 5. Semantic Memory Network Subnetwork Modularity for Positive Correct Rejections in the Theta Frequency Band              | 0.06   | -0.02  | 0.00   | -0.04 | 1.00  |        |        |      |
| 6. Semantic Memory Network Subnetwork Modularity for Positive Correct Rejections in the Alpha Frequency Band              | 0.13   | 0.05   | 0.10   | 0.10  | -0.13 | 1.00   |        |      |
| 7. Semantic Memory Network Subnetwork Modularity for Positive Correct Rejections in the Beta Frequency Band               | 0.06   | 0.02   | 0.02   | 0.01  | -0.02 | 0.60** | 1.00   |      |
| 8. Semantic Memory Network Subnetwork Modularity for Positive Correct Rejections in the Gamma Frequency Band              | 0.09   | 0.00   | 0.04   | 0.03  | -0.06 | 0.70** | 0.55** | 1.00 |
| Note.                                                                                                                     |        |        |        |       |       |        |        |      |
| **. Correlation is significant at the 0.01 level (2-tailed).                                                              |        |        |        |       |       |        |        |      |
| *. Correlation is significant at the 0.05 level (2-tailed).                                                               |        |        |        |       |       |        |        |      |
| Table 46                                                                                                                  |        |        |        |       |       |        |        |      |

Table 47: Summary of Correlations between Emotion and Semantic Memory Network Select Network Modularity for Negative Correct Rejections

| Table 47                                                                                                                      |        |        |        |       |      |        |        |      |
|-------------------------------------------------------------------------------------------------------------------------------|--------|--------|--------|-------|------|--------|--------|------|
| Summary of Correlations between Emotion and Semantic Memory Network Select Network Modularity for Negative Correct Rejections |        |        |        |       |      |        |        |      |
| Measure                                                                                                                       | 1      | 2      | 3      | 4     | 5    | 6      | 7      | 8    |
| 1. Emotion Network Select Network Modularity for Negative Correct Rejections in the Theta Frequency Band                      | 1.00   |        |        |       |      |        |        |      |
| 2. Emotion Network Select Network Modularity for Negative Correct Rejections in the Alpha Frequency Band                      | 0.34** | 1.00   |        |       |      |        |        |      |
| 3. Emotion Network Select Network Modularity for Negative Correct Rejections in the Beta Frequency Band                       | 0.31** | 0.50** | 1.00   |       |      |        |        |      |
| 4. Emotion Network Select Network Modularity for Negative Correct Rejections in the Gamma Frequency Band                      | 0.43** | 0.54** | 0.47** | 1.00  |      |        |        |      |
| 5. Semantic Memory Network Select Network Modularity for Negative Correct Rejections in the Theta Frequency Band              | -0.14  | -0.08  | -0.12  | -0.10 | 1.00 |        |        |      |
| 6. Semantic Memory Network Select Network Modularity for Negative Correct Rejections in the Alpha Frequency Band              | 0.06   | -0.19* | -0.05  | -0.06 | 0.00 | 1.00   |        |      |
| 7. Semantic Memory Network Select Network Modularity for Negative Correct Rejections in the Beta Frequency Band               | 0.14   | -0.05  | -0.08  | -0.01 | 0.09 | 0.37** | 1.00   |      |
| 8. Semantic Memory Network Select Network Modularity for Negative Correct Rejections in the Gamma Frequency Band              | 0.04   | -0.11  | -0.11  | -0.03 | 0.15 | 0.50** | 0.37** | 1.00 |

Note.

\*\* . Correlation is significant at the 0.01 level (2-tailed).

\* . Correlation is significant at the 0.05 level (2-tailed).

Table 47

Table 48: Summary of Correlations between Emotion and Semantic Memory Network Subnetwork Modularity for Negative Correct Rejections

| Table 48                                                                                                                  |        |        |        |       |       |        |        |      |
|---------------------------------------------------------------------------------------------------------------------------|--------|--------|--------|-------|-------|--------|--------|------|
| Summary of Correlations between Emotion and Semantic Memory Network Subnetwork Modularity for Negative Correct Rejections |        |        |        |       |       |        |        |      |
| Measure                                                                                                                   | 1      | 2      | 3      | 4     | 5     | 6      | 7      | 8    |
| 1. Emotion Network Subnetwork Modularity for Negative Correct Rejections in the Theta Frequency Band                      | 1.00   |        |        |       |       |        |        |      |
| 2. Emotion Network Subnetwork Modularity for Negative Correct Rejections in the Alpha Frequency Band                      | 0.38** | 1.00   |        |       |       |        |        |      |
| 3. Emotion Network Subnetwork Modularity for Negative Correct Rejections in the Beta Frequency Band                       | 0.44** | 0.60** | 1.00   |       |       |        |        |      |
| 4. Emotion Network Subnetwork Modularity for Negative Correct Rejections in the Gamma Frequency Band                      | 0.64** | 0.56** | 0.53** | 1.00  |       |        |        |      |
| 5. Semantic Memory Network Subnetwork Modularity for Negative Correct Rejections in the Theta Frequency Band              | -0.13  | -0.19* | -0.12  | -0.12 | 1.00  |        |        |      |
| 6. Semantic Memory Network Subnetwork Modularity for Negative Correct Rejections in the Alpha Frequency Band              | 0.18*  | 0.16'  | 0.16*  | 0.18* | -0.07 | 1.00   |        |      |
| 7. Semantic Memory Network Subnetwork Modularity for Negative Correct Rejections in the Beta Frequency Band               | 0.13   | 0.07   | 0.04   | 0.17* | -0.07 | 0.66** | 1.00   |      |
| 8. Semantic Memory Network Subnetwork Modularity for Negative Correct Rejections in the Gamma Frequency Band              | 0.14   | 0.09   | 0.07   | 0.06  | -0.03 | 0.54** | 0.55** | 1.00 |
| Note.                                                                                                                     |        |        |        |       |       |        |        |      |
| ** Correlation is significant at the 0.01 level (2-tailed).                                                               |        |        |        |       |       |        |        |      |
| * Correlation is significant at the 0.05 level (2-tailed).                                                                |        |        |        |       |       |        |        |      |
| Table 48                                                                                                                  |        |        |        |       |       |        |        |      |

Table 49: Summary of Correlations between Emotion and Semantic Memory Network Select Network Modularity for Positive False Alarms

| Table 49                                                                                                                |        |        |        |       |        |        |        |      |
|-------------------------------------------------------------------------------------------------------------------------|--------|--------|--------|-------|--------|--------|--------|------|
| Summary of Correlations between Emotion and Semantic Memory Network Select Network Modularity for Positive False Alarms |        |        |        |       |        |        |        |      |
| Measure                                                                                                                 | 1      | 2      | 3      | 4     | 5      | 6      | 7      | 8    |
| 1. Emotion Network Select Network Modularity for Positive False Alarms in the Theta Frequency Band                      | 1.00   |        |        |       |        |        |        |      |
| 2. Emotion Network Select Network Modularity for Positive False Alarms in the Alpha Frequency Band                      | 0.26** | 1.00   |        |       |        |        |        |      |
| 3. Emotion Network Select Network Modularity for Positive False Alarms in the Beta Frequency Band                       | 0.24** | 0.41** | 1.00   |       |        |        |        |      |
| 4. Emotion Network Select Network Modularity for Positive False Alarms in the Gamma Frequency Band                      | 0.54** | 0.38** | 0.37** | 1.00  |        |        |        |      |
| 5. Semantic Memory Network Select Network Modularity for Positive False Alarms in the Theta Frequency Band              | 0.00   | 0.10   | 0.06   | 0.05  | 1.00   |        |        |      |
| 6. Semantic Memory Network Select Network Modularity for Positive False Alarms in the Alpha Frequency Band              | -0.10  | -0.07  | -0.09  | -0.08 | 0.12   | 1.00   |        |      |
| 7. Semantic Memory Network Select Network Modularity for Positive False Alarms in the Beta Frequency Band               | 0.03   | -0.01  | -0.02  | 0.03  | 0.04   | 0.36** | 1.00   |      |
| 8. Semantic Memory Network Select Network Modularity for Positive False Alarms in the Gamma Frequency Band              | 0.03   | 0.04   | -0.08  | -0.05 | 0.21** | 0.37** | 0.37** | 1.00 |
| Note.                                                                                                                   |        |        |        |       |        |        |        |      |
| **. Correlation is significant at the 0.01 level (2-tailed).                                                            |        |        |        |       |        |        |        |      |
| *. Correlation is significant at the 0.05 level (2-tailed).                                                             |        |        |        |       |        |        |        |      |
| Table 49                                                                                                                |        |        |        |       |        |        |        |      |

Table 50: Summary of Correlations between Emotion and Semantic Memory Network Subnetwork Modularity for Positive False Alarms

| Table 50                                                                                                            |        |        |        |       |       |        |        |      |
|---------------------------------------------------------------------------------------------------------------------|--------|--------|--------|-------|-------|--------|--------|------|
| Summary of Correlations between Emotion and Semantic Memory Network Subnetwork Modularity for Positive False Alarms |        |        |        |       |       |        |        |      |
| Measure                                                                                                             | 1      | 2      | 3      | 4     | 5     | 6      | 7      | 8    |
| 1. Emotion Network Subnetwork Modularity for Positive False Alarms in the Theta Frequency Band                      | 1.00   |        |        |       |       |        |        |      |
| 2. Emotion Network Subnetwork Modularity for Positive False Alarms in the Alpha Frequency Band                      | 0.43** | 1.00   |        |       |       |        |        |      |
| 3. Emotion Network Subnetwork Modularity for Positive False Alarms in the Beta Frequency Band                       | 0.43** | 0.50** | 1.00   |       |       |        |        |      |
| 4. Emotion Network Subnetwork Modularity for Positive False Alarms in the Gamma Frequency Band                      | 0.61** | 0.56** | 0.45** | 1.00  |       |        |        |      |
| 5. Semantic Memory Network Subnetwork Modularity for Positive False Alarms in the Theta Frequency Band              | 0.03   | 0.11   | -0.02  | 0.05  | 1.00  |        |        |      |
| 6. Semantic Memory Network Subnetwork Modularity for Positive False Alarms in the Alpha Frequency Band              | -0.02  | 0.02   | 0.01   | -0.07 | 0.20* | 1.00   |        |      |
| 7. Semantic Memory Network Subnetwork Modularity for Positive False Alarms in the Beta Frequency Band               | 0.05   | 0.08   | 0.05   | -0.09 | 0.10  | 0.57** | 1.00   |      |
| 8. Semantic Memory Network Subnetwork Modularity for Positive False Alarms in the Gamma Frequency Band              | 0.08   | 0.03   | -0.07  | -0.05 | 0.14  | 0.57** | 0.39** | 1.00 |
| Note.                                                                                                               |        |        |        |       |       |        |        |      |
| ** . Correlation is significant at the 0.01 level (2-tailed).                                                       |        |        |        |       |       |        |        |      |
| * . Correlation is significant at the 0.05 level (2-tailed).                                                        |        |        |        |       |       |        |        |      |
| Table 50                                                                                                            |        |        |        |       |       |        |        |      |

Table 51: Summary of Correlations between Emotion and Semantic Memory Network Select Network Modularity for Negative False Alarms

| Table 51                                                                                                                |        |        |        |       |       |        |       |      |
|-------------------------------------------------------------------------------------------------------------------------|--------|--------|--------|-------|-------|--------|-------|------|
| Summary of Correlations between Emotion and Semantic Memory Network Select Network Modularity for Negative False Alarms |        |        |        |       |       |        |       |      |
| Measure                                                                                                                 | 1      | 2      | 3      | 4     | 5     | 6      | 7     | 8    |
| 1. Emotion Network Select Network Modularity for Negative False Alarms in the Theta Frequency Band                      | 1.00   |        |        |       |       |        |       |      |
| 2. Emotion Network Select Network Modularity for Negative False Alarms in the Alpha Frequency Band                      | 0.40** | 1.00   |        |       |       |        |       |      |
| 3. Emotion Network Select Network Modularity for Negative False Alarms in the Beta Frequency Band                       | 0.23** | 0.42** | 1.00   |       |       |        |       |      |
| 4. Emotion Network Select Network Modularity for Negative False Alarms in the Gamma Frequency Band                      | 0.46** | 0.44** | 0.30** | 1.00  |       |        |       |      |
| 5. Semantic Memory Network Select Network Modularity for Negative False Alarms in the Theta Frequency Band              | 0.07   | .158*  | 0.05   | 0.02  | 1.00  |        |       |      |
| 6. Semantic Memory Network Select Network Modularity for Negative False Alarms in the Alpha Frequency Band              | 0.01   | -0.12  | 0.02   | -0.13 | 0.07  | 1.00   |       |      |
| 7. Semantic Memory Network Select Network Modularity for Negative False Alarms in the Beta Frequency Band               | -0.07  | -0.02  | 0.03   | -0.05 | -0.07 | 0.34** | 1.00  |      |
| 8. Semantic Memory Network Select Network Modularity for Negative False Alarms in the Gamma Frequency Band              | 0.00   | -0.05  | 0.08   | 0.06  | 0.16* | 0.41** | 0.18* | 1.00 |
| Note.                                                                                                                   |        |        |        |       |       |        |       |      |
| ** Correlation is significant at the 0.01 level (2-tailed).                                                             |        |        |        |       |       |        |       |      |
| * Correlation is significant at the 0.05 level (2-tailed).                                                              |        |        |        |       |       |        |       |      |
| Table 51                                                                                                                |        |        |        |       |       |        |       |      |

Table 52: Summary of Correlations between Emotion and Semantic Memory Network Subnetwork Modularity for Negative False Alarms

| Table 52                                                                                                            |        |        |        |       |      |        |        |      |
|---------------------------------------------------------------------------------------------------------------------|--------|--------|--------|-------|------|--------|--------|------|
| Summary of Correlations between Emotion and Semantic Memory Network Subnetwork Modularity for Negative False Alarms |        |        |        |       |      |        |        |      |
| Measure                                                                                                             | 1      | 2      | 3      | 4     | 5    | 6      | 7      | 8    |
| 1. Emotion Network Subnetwork Modularity for Negative False Alarms in the Theta Frequency Band                      | 1.00   |        |        |       |      |        |        |      |
| 2. Emotion Network Subnetwork Modularity for Negative False Alarms in the Alpha Frequency Band                      | 0.38** | 1.00   |        |       |      |        |        |      |
| 3. Emotion Network Subnetwork Modularity for Negative False Alarms in the Beta Frequency Band                       | 0.43** | 0.61** | 1.00   |       |      |        |        |      |
| 4. Emotion Network Subnetwork Modularity for Negative False Alarms in the Gamma Frequency Band                      | 0.65** | 0.50** | 0.50** | 1.00  |      |        |        |      |
| 5. Semantic Memory Network Subnetwork Modularity for Negative False Alarms in the Theta Frequency Band              | -0.20* | -0.11  | -0.01  | -0.08 | 1.00 |        |        |      |
| 6. Semantic Memory Network Subnetwork Modularity for Negative False Alarms in the Alpha Frequency Band              | 0.13   | -0.04  | -0.01  | 0.05  | 0.03 | 1.00   |        |      |
| 7. Semantic Memory Network Subnetwork Modularity for Negative False Alarms in the Beta Frequency Band               | 0.01   | -0.07  | 0.05   | 0.02  | 0.04 | 0.40** | 1.00   |      |
| 8. Semantic Memory Network Subnetwork Modularity for Negative False Alarms in the Gamma Frequency Band              | 0.13   | 0.07   | 0.08   | 0.06  | 0.02 | 0.58** | 0.38** | 1.00 |
| Note.                                                                                                               |        |        |        |       |      |        |        |      |
| **. Correlation is significant at the 0.01 level (2-tailed).                                                        |        |        |        |       |      |        |        |      |
| *. Correlation is significant at the 0.05 level (2-tailed).                                                         |        |        |        |       |      |        |        |      |
| Table 52                                                                                                            |        |        |        |       |      |        |        |      |

Table 53: Summary of Correlations between Emotion and Semantic Memory Network Select Network Modularity for Positive Misses

| Table 53                                                                                                          |        |        |       |       |       |      |      |      |
|-------------------------------------------------------------------------------------------------------------------|--------|--------|-------|-------|-------|------|------|------|
| Summary of Correlations between Emotion and Semantic Memory Network Select Network Modularity for Positive Misses |        |        |       |       |       |      |      |      |
| Measure                                                                                                           | 1      | 2      | 3     | 4     | 5     | 6    | 7    | 8    |
| 1. Emotion Network Select Network Modularity for Positive Misses in the Theta Frequency Band                      | 1.00   |        |       |       |       |      |      |      |
| 2. Emotion Network Select Network Modularity for Positive Misses in the Alpha Frequency Band                      | 0.03   | 1.00   |       |       |       |      |      |      |
| 3. Emotion Network Select Network Modularity for Positive Misses in the Beta Frequency Band                       | 0.14   | 0.29** | 1.00  |       |       |      |      |      |
| 4. Emotion Network Select Network Modularity for Positive Misses in the Gamma Frequency Band                      | 0.32** | 0.21*  | 0.14  | 1.00  |       |      |      |      |
| 5. Semantic Memory Network Select Network Modularity for Positive Misses in the Theta Frequency Band              | 0.05   | 0.01   | 0.06  | -0.02 | 1.00  |      |      |      |
| 6. Semantic Memory Network Select Network Modularity for Positive Misses in the Alpha Frequency Band              | 0.15   | 0.04   | 0.06  | 0.05  | 0.13  | 1.00 |      |      |
| 7. Semantic Memory Network Select Network Modularity for Positive Misses in the Beta Frequency Band               | 0.00   | 0.20*  | 0.14  | 0.16  | -0.06 | 0.12 | 1.00 |      |
| 8. Semantic Memory Network Select Network Modularity for Positive Misses in the Gamma Frequency Band              | 0.11   | 0.00   | -0.13 | -0.02 | 0.20* | 0.16 | 0.16 | 1.00 |
| Note.                                                                                                             |        |        |       |       |       |      |      |      |
| **. Correlation is significant at the 0.01 level (2-tailed).                                                      |        |        |       |       |       |      |      |      |
| *. Correlation is significant at the 0.05 level (2-tailed).                                                       |        |        |       |       |       |      |      |      |
| Table 53                                                                                                          |        |        |       |       |       |      |      |      |



Table 54: Summary of Correlations between Emotion and Semantic Memory Network Subnetwork Modularity for Positive Misses

| Table 54                                                                                                      |          |          |          |          |          |          |          |          |
|---------------------------------------------------------------------------------------------------------------|----------|----------|----------|----------|----------|----------|----------|----------|
| Summary of Correlations between Emotion and Semantic Memory Network Subnetwork Modularity for Positive Misses |          |          |          |          |          |          |          |          |
| <u>Measure</u>                                                                                                | <u>1</u> | <u>2</u> | <u>3</u> | <u>4</u> | <u>5</u> | <u>6</u> | <u>7</u> | <u>8</u> |
| 1. Emotion Network Subnetwork Modularity for Positive Misses in the Theta Frequency Band                      | 1.00     |          |          |          |          |          |          |          |
| 2. Emotion Network Subnetwork Modularity for Positive Misses in the Alpha Frequency Band                      | 0.20*    | 1.00     |          |          |          |          |          |          |
| 3. Emotion Network Subnetwork Modularity for Positive Misses in the Beta Frequency Band                       | 0.35**   | 0.46**   | 1.00     |          |          |          |          |          |
| 4. Emotion Network Subnetwork Modularity for Positive Misses in the Gamma Frequency Band                      | 0.42**   | 0.40**   | 0.29**   | 1.00     |          |          |          |          |
| 5. Semantic Memory Network Subnetwork Modularity for Positive Misses in the Theta Frequency Band              | -0.18*   | -0.12    | -0.06    | 0.00     | 1.00     |          |          |          |
| 6. Semantic Memory Network Subnetwork Modularity for Positive Misses in the Alpha Frequency Band              | -0.11    | -0.02    | -0.13    | -0.09    | 0.09     | 1.00     |          |          |
| 7. Semantic Memory Network Subnetwork Modularity for Positive Misses in the Beta Frequency Band               | 0.12     | 0.14     | 0.02     | 0.06     | 0.14     | 0.20*    | 1.00     |          |
| 8. Semantic Memory Network Subnetwork Modularity for Positive Misses in the Gamma Frequency Band              | -0.01    | 0.00     | -0.04    | 0.11     | 0.16     | 0.34**   | 0.08     | 1.00     |
| Note.                                                                                                         |          |          |          |          |          |          |          |          |
| **, Correlation is significant at the 0.01 level (2-tailed).                                                  |          |          |          |          |          |          |          |          |
| *, Correlation is significant at the 0.05 level (2-tailed).                                                   |          |          |          |          |          |          |          |          |
| Table 54                                                                                                      |          |          |          |          |          |          |          |          |

Table 55: Summary of Correlations between Emotion and Semantic Memory Network Select Network Modularity for Negative Misses

| Table 55                                                                                                          |        |        |        |       |        |        |      |      |
|-------------------------------------------------------------------------------------------------------------------|--------|--------|--------|-------|--------|--------|------|------|
| Summary of Correlations between Emotion and Semantic Memory Network Select Network Modularity for Negative Misses |        |        |        |       |        |        |      |      |
| Measure                                                                                                           | 1      | 2      | 3      | 4     | 5      | 6      | 7    | 8    |
| 1. Emotion Network Select Network Modularity for Negative Misses in the Theta Frequency Band                      | 1.00   |        |        |       |        |        |      |      |
| 2. Emotion Network Select Network Modularity for Negative Misses in the Alpha Frequency Band                      | 0.15   | 1.00   |        |       |        |        |      |      |
| 3. Emotion Network Select Network Modularity for Negative Misses in the Beta Frequency Band                       | 0.23** | 0.40** | 1.00   |       |        |        |      |      |
| 4. Emotion Network Select Network Modularity for Negative Misses in the Gamma Frequency Band                      | 0.33** | 0.33** | 0.22** | 1.00  |        |        |      |      |
| 5. Semantic Memory Network Select Network Modularity for Negative Misses in the Theta Frequency Band              | -0.03  | 0.00   | 0.11   | -0.01 | 1.00   |        |      |      |
| 6. Semantic Memory Network Select Network Modularity for Negative Misses in the Alpha Frequency Band              | -0.03  | 0.08   | 0.00   | 0.05  | 0.12   | 1.00   |      |      |
| 7. Semantic Memory Network Select Network Modularity for Negative Misses in the Beta Frequency Band               | 0.06   | 0.07   | 0.09   | 0.01  | 0.25** | 0.27** | 1.00 |      |
| 8. Semantic Memory Network Select Network Modularity for Negative Misses in the Gamma Frequency Band              | -0.09  | -0.05  | -0.02  | 0.09  | 0.20*  | 0.28** | 0.12 | 1.00 |

Note.

\*\* . Correlation is significant at the 0.01 level (2-tailed).

\* . Correlation is significant at the 0.05 level (2-tailed).

Table 55

Table 56: Summary of Correlations between Emotion and Semantic Memory Network Subnetwork Modularity for Negative Misses

| Table 56                                                                                                     |          |          |          |          |          |          |          |          |
|--------------------------------------------------------------------------------------------------------------|----------|----------|----------|----------|----------|----------|----------|----------|
| Summary of Correlations between Emotion and Semantic Memory Network Subnetwork Modularity for Nentive Misses |          |          |          |          |          |          |          |          |
| Measure                                                                                                      | <u>1</u> | <u>2</u> | <u>3</u> | <u>4</u> | <u>5</u> | <u>6</u> | <u>7</u> | <u>8</u> |
| 1. Emotion Network Subnetwork Modularity for Negative Mines in the Theta Frequency Band                      | 1.00     |          |          |          |          |          |          |          |
| 2. Emotion Network Subnetwork Modularity for Negative Mines in the Alpha Frequency Band                      | 0.23**   | 1.00     |          |          |          |          |          |          |
| 3. Emotion Network Subnetwork Modularity for Negative Mines in the Beta Frequency Band                       | 0.24**   | 0.52**   | 1.00     |          |          |          |          |          |
| 4. Emotion Network Subnetwork Modularity for Negative Misses in the Gamma Frequency Band                     | 0.49**   | 0.48**   | 0.32**   | 1.00     |          |          |          |          |
| 5. Semantic Memory Network Subnetwork Modularity for Negative Misses in the Theta Frequency Band             | -0.09    | -0.06    | -0.06    | -0.08    | 1.00     |          |          |          |
| 6. Semantic Memory Network Subnetwork Modularity for Negative Mines in the Alpha Frequency Band              | -0.15    | 0.09     | 0.05     | 0.01     | -0.03    | 1.00     |          |          |
| 7. Semantic Memory Network Subnetwork Modularity for Negative Nlisses in the Beta Frequency Band             | 0.02     | -0.04    | -0.04    | 0.07     | 0.08     | 0.26**   | 1.00     |          |
| 8. Semantic Memory Network Subnetwork Modularity for Negative Nlisses in the Gamma Frequency Band            | -0.21**  | 0.05     | -0.03    | -0.03    | 0.11     | 0.39**   | 0.07     | 1.00     |
| Note.                                                                                                        |          |          |          |          |          |          |          |          |
| **. Correlation is significant at the 0.01 level (2-tailed).                                                 |          |          |          |          |          |          |          |          |
| *. Correlation is significant at the 0.05 level (2-tailed).                                                  |          |          |          |          |          |          |          |          |
| Table 56                                                                                                     |          |          |          |          |          |          |          |          |

Table 57: Summary of Correlations between Emotion and Semantic Memory Network Select Network Modularity for Positive Hits

| Table 57                                                                                                        |        |        |        |       |        |        |      |      |
|-----------------------------------------------------------------------------------------------------------------|--------|--------|--------|-------|--------|--------|------|------|
| Summary of Correlations between Emotion and Semantic Memory Network Select Network Modularity for Positive Hits |        |        |        |       |        |        |      |      |
| Measure                                                                                                         | 1      | 2      | 3      | 4     | 5      | 6      | 7    | 8    |
| 1. Emotion Network Select Network Modularity for Positive Hits in the Theta Frequency Band                      | 1.00   |        |        |       |        |        |      |      |
| 2. Emotion Network Select Network Modularity for Positive Hits in the Alpha Frequency Band                      | 0.14   | 1.00   |        |       |        |        |      |      |
| 3. Emotion Network Select Network Modularity for Positive Hits in the Beta Frequency Band                       | 0.13   | 0.26** | 1.00   |       |        |        |      |      |
| 4. Emotion Network Select Network Modularity for Positive Hits in the Gamma Frequency Band                      | 0.33** | 0.30** | 0.19*  | 1.00  |        |        |      |      |
| 5. Semantic Memory Network Select Network Modularity for Positive Hits in the Theta Frequency Band              | -0.05  | -0.05  | -0.10  | -0.10 | 1.00   |        |      |      |
| 6. Semantic Memory Network Select Network Modularity for Positive Hits in the Alpha Frequency Band              | 0.16   | 0.08   | -0.19* | -0.04 | 0.15   | 1.00   |      |      |
| 7. Semantic Memory Network Select Network Modularity for Positive Hits in the Beta Frequency Band               | -0.01  | -0.10  | 0.01   | -0.13 | 0.18   | 0.16   | 1.00 |      |
| 8. Semantic Memory Network Select Network Modularity for Positive Hits in the Gamma Frequency Band              | 0.13   | -0.02  | -0.08  | 0.06  | 0.26** | 0.42** | 0.08 | 1.00 |

Note.

\*\* . Correlation is significant at the 0.01 level (2-tailed).

\* . Correlation is significant at the 0.05 level (2-tailed).

Table 57

Table 58: Summary of Correlations between Emotion and Semantic Memory Network Subnetwork Modularity for Positive Hits

| Table 58                                                                                                    |        |        |       |       |       |      |       |      |
|-------------------------------------------------------------------------------------------------------------|--------|--------|-------|-------|-------|------|-------|------|
| Summary of Correlations between Emotion and Semantic Memory Network Subnetwork Modularity for Positive Hits |        |        |       |       |       |      |       |      |
| Measure                                                                                                     | 1      | 2      | 3     | 4     | 5     | 6    | 7     | 8    |
| 1. Emotion Network Subnetwork Modularity for Positive Hits in the Theta Frequency Band                      | 1.00   |        |       |       |       |      |       |      |
| 2. Emotion Network Subnetwork Modularity for Positive Hits in the Alpha Frequency Band                      | 0.32** | 1.00   |       |       |       |      |       |      |
| 3. Emotion Network Subnetwork Modularity for Positive Hits in the Beta Frequency Band                       | 0.23*  | 0.30** | 1.00  |       |       |      |       |      |
| 4. Emotion Network Subnetwork Modularity for Positive Hits in the Gamma Frequency Band                      | 0.58** | 0.32** | 0.20* | 1.00  |       |      |       |      |
| 5. Semantic Memory Network Subnetwork Modularity for Positive Hits in the Theta Frequency Band              | 0.04   | 0.25** | 0.06  | 0.22* | 1.00  |      |       |      |
| 6. Semantic Memory Network Subnetwork Modularity for Positive Hits in the Alpha Frequency Band              | 0.14   | -0.09  | -0.01 | 0.09  | -0.13 | 1.00 |       |      |
| 7. Semantic Memory Network Subnetwork Modularity for Positive Hits in the Beta Frequency Band               | -0.02  | 0.04   | 0.15  | 0.04  | -0.02 | 0.10 | 1.00  |      |
| 8. Semantic Memory Network Subnetwork Modularity for Positive Hits in the Gamma Frequency Band              | 0.04   | 0.08   | 0.06  | 0.03  | 0.14  | 0.10 | 0.19* | 1.00 |
| Note.                                                                                                       |        |        |       |       |       |      |       |      |
| **. Correlation is significant at the 0.01 level (2-tailed).                                                |        |        |       |       |       |      |       |      |
| *. Correlation is significant at the 0.05 level (2-tailed).                                                 |        |        |       |       |       |      |       |      |
| Table 58                                                                                                    |        |        |       |       |       |      |       |      |

Table 59: Summary of Correlations between Emotion and Semantic Memory Network Select Network Modularity for Negative Hits

| Table 59                                                                                                        |        |       |       |       |        |        |       |      |
|-----------------------------------------------------------------------------------------------------------------|--------|-------|-------|-------|--------|--------|-------|------|
| Summary of Correlations between Emotion and Semantic Memory Network Select Network Modularity for Negative Hits |        |       |       |       |        |        |       |      |
| Measure                                                                                                         | 1      | 2     | 3     | 4     | 5      | 6      | 7     | 8    |
| 1.Emotion Network Select Network Modularity for Negative Hits in the Theta Frequency Band                       | 1.00   |       |       |       |        |        |       |      |
| 2.Emotion Network Select Network Modularity for Negative Hits in the Alpha Frequency Band                       | 0.13   | 1.00  |       |       |        |        |       |      |
| 3.Emotion Network Select Network Modularity for Negative Hits in the Beta Frequency Band                        | 0.14   | 0.08  | 1.00  |       |        |        |       |      |
| 4.Emotion Network Select Network Modularity for Negative Hits in the Gamma Frequency Band                       | 0.41** | 0.21* | 0.12  | 1.00  |        |        |       |      |
| 5.Semantic Memory Network Select Network Modularity for Negative Hits in the Theta Frequency Band               | 0.11   | -0.06 | -0.04 | 0.04  | 1.00   |        |       |      |
| 6.Semantic Memory Network Select Network Modularity for Negative Hits in the Alpha Frequency Band               | -0.20* | -0.08 | 0.03  | 0.01  | 0.20*  | 1.00   |       |      |
| 7.Semantic Memory Network Select Network Modularity for Negative Hits in the Beta Frequency Band                | 0.00   | -0.10 | 0.14  | 0.13  | 0.03   | 0.05   | 1.00  |      |
| 8.Semantic Memory Network Select Network Modularity for Negative Hits in the Gamma Frequency Band               | 0.03   | -0.06 | 0.02  | -0.02 | 0.39** | 0.28** | -0.02 | 1.00 |
| Note.                                                                                                           |        |       |       |       |        |        |       |      |
| **. Correlation is significant at the 0.01 level (2-tailed).                                                    |        |       |       |       |        |        |       |      |
| *. Correlation is significant at the 0.05 level (2-tailed).                                                     |        |       |       |       |        |        |       |      |
| Table 59                                                                                                        |        |       |       |       |        |        |       |      |

Table 60: Summary of Correlations between Emotion and Semantic Memory Network Subnetwork Modularity for Negative Hits

| Table 60                                                                                                    |        |        |        |       |        |        |       |      |
|-------------------------------------------------------------------------------------------------------------|--------|--------|--------|-------|--------|--------|-------|------|
| Summary of Correlations between Emotion and Semantic Memory Network Subnetwork Modularity for Negative Hits |        |        |        |       |        |        |       |      |
| Measure                                                                                                     | 1      | 2      | 3      | 4     | 5      | 6      | 7     | 8    |
| 1. Emotion Network Subnetwork Modularity for Negative Hits in the Theta Frequency Band                      | 1.00   |        |        |       |        |        |       |      |
| 2. Emotion Network Subnetwork Modularity for Negative Hits in the Alpha Frequency Band                      | -0.02  | 1.00   |        |       |        |        |       |      |
| 3. Emotion Network Subnetwork Modularity for Negative Hits in the Beta Frequency Band                       | 0.33** | 0.32** | 1.00   |       |        |        |       |      |
| 4. Emotion Network Subnetwork Modularity for Negative Hits in the Gamma Frequency Band                      | 0.5**  | 0.23*  | 0.31** | 1.00  |        |        |       |      |
| 5. Semantic Memory Network Subnetwork Modularity for Negative Hits in the Theta Frequency Band              | -0.06  | 0.09   | 0.01   | 0.01  | 1.00   |        |       |      |
| 6. Semantic Memory Network Subnetwork Modularity for Negative Hits in the Alpha Frequency Band              | 0.10   | 0.19*  | 0.06   | 0.14  | 0.02   | 1.00   |       |      |
| 7. Semantic Memory Network Subnetwork Modularity for Negative Hits in the Beta Frequency Band               | -0.08  | 0.10   | 0.09   | -0.07 | 0.06   | 0.31** | 1.00  |      |
| 8. Semantic Memory Network Subnetwork Modularity for Negative Hits in the Gamma Frequency Band              | -0.06  | 0.05   | 0.04   | 0.06  | 0.22** | 0.18*  | -0.09 | 1.00 |
| Note.                                                                                                       |        |        |        |       |        |        |       |      |
| **, Correlation is significant at the 0.01 level (2-tailed).                                                |        |        |        |       |        |        |       |      |
| *, Correlation is significant at the 0.05 level (2-tailed).                                                 |        |        |        |       |        |        |       |      |
| Table 60                                                                                                    |        |        |        |       |        |        |       |      |

Table. 61 Descriptive Statistics for the Math Feedback task as a function of Problem Type.

| Table 61                                                                     |                                   |        |        |       |       |    |
|------------------------------------------------------------------------------|-----------------------------------|--------|--------|-------|-------|----|
| Descriptive Statistics for all Behavioral Variables of Interest in the Study |                                   |        |        |       |       |    |
| Variable                                                                     | Condition                         | Gender | Mean   | SD    | N     |    |
| Score on Easy Problems                                                       | DMT                               | female | 47.35  | 0.18  | 49    |    |
|                                                                              |                                   | male   | 62.58  | 0.21  | 37    |    |
|                                                                              |                                   | total  | 53.47  | 0.20  | 86    |    |
|                                                                              | PST                               | female | 55.68  | 0.17  | 38    |    |
|                                                                              |                                   | male   | 66.88  | 0.19  | 36    |    |
|                                                                              |                                   | total  | 61.13  | 0.19  | 74    |    |
|                                                                              | Total                             | female | 50.99  | 0.18  | 87    |    |
|                                                                              |                                   | male   | 64.19  | 0.20  | 73    |    |
|                                                                              |                                   | total  | 57.01  | 0.20  | 160   |    |
|                                                                              | Score on Medium Problems          | DMT    | female | 41.90 | 0.10  | 49 |
|                                                                              |                                   |        | male   | 47.44 | 0.16  | 37 |
|                                                                              |                                   |        | total  | 44.28 | 0.13  | 86 |
| PST                                                                          |                                   | female | 43.55  | 0.13  | 38    |    |
|                                                                              |                                   | male   | 50.78  | 0.13  | 36    |    |
|                                                                              |                                   | total  | 47.07  | 0.13  | 74    |    |
| Total                                                                        |                                   | female | 43.62  | 0.12  | 87    |    |
|                                                                              |                                   | male   | 49.09  | 0.14  | 73    |    |
|                                                                              |                                   | total  | 45.57  | 0.13  | 160   |    |
| Score on Hard Problems                                                       |                                   | DMT    | female | 41.69 | 0.29  | 49 |
|                                                                              |                                   |        | male   | 36.43 | 0.28  | 37 |
|                                                                              |                                   |        | total  | 39.43 | 0.29  | 86 |
|                                                                              | PST                               | female | 29.10  | 0.24  | 38    |    |
|                                                                              |                                   | male   | 35.89  | 0.24  | 36    |    |
|                                                                              |                                   | total  | 32.40  | 0.24  | 74    |    |
|                                                                              | Total                             | female | 36.19  | 0.28  | 87    |    |
|                                                                              |                                   | male   | 36.17  | 0.26  | 73    |    |
|                                                                              |                                   | total  | 36.18  | 0.27  | 160   |    |
|                                                                              | Number of Easy Problems Attempted | DMT    | female | 32.08 | 11.64 | 49 |
|                                                                              |                                   |        | male   | 31.11 | 13.93 | 37 |
|                                                                              |                                   |        | total  | 31.66 | 12.61 | 86 |
| PST                                                                          |                                   | female | 36.18  | 11.43 | 38    |    |
|                                                                              |                                   | male   | 29.94  | 9.82  | 36    |    |
|                                                                              |                                   | total  | 33.15  | 11.06 | 74    |    |
| Total                                                                        |                                   | female | 33.49  | 11.66 | 87    |    |
|                                                                              |                                   | male   | 30.53  | 12.01 | 73    |    |
|                                                                              |                                   | total  | 32.35  | 11.90 | 160   |    |
| Number of Medium Problems Attempted                                          |                                   | DMT    | female | 35.49 | 7.27  | 49 |
|                                                                              |                                   |        | male   | 41.16 | 8.01  | 37 |
|                                                                              |                                   |        | total  | 37.93 | 8.06  | 86 |
|                                                                              | PST                               | female | 38.37  | 7.38  | 38    |    |
|                                                                              |                                   | male   | 40.17  | 7.87  | 36    |    |
|                                                                              |                                   | total  | 39.24  | 7.62  | 74    |    |
|                                                                              | Total                             | female | 36.75  | 7.41  | 87    |    |
|                                                                              |                                   | male   | 40.67  | 7.90  | 73    |    |
|                                                                              |                                   | total  | 38.54  | 7.86  | 160   |    |
|                                                                              | Number of Hard Problems Attempted | DMT    | female | 10.90 | 4.11  | 49 |
|                                                                              |                                   |        | male   | 13.00 | 3.89  | 37 |
|                                                                              |                                   |        | total  | 11.80 | 4.13  | 86 |
| PST                                                                          |                                   | female | 12.82  | 4.40  | 38    |    |
|                                                                              |                                   | male   | 14.94  | 4.33  | 36    |    |
|                                                                              |                                   | total  | 13.85  | 4.47  | 74    |    |
| Total                                                                        |                                   | female | 11.74  | 4.33  | 87    |    |
|                                                                              |                                   | male   | 13.96  | 4.20  | 73    |    |
|                                                                              |                                   | total  | 12.75  | 4.40  | 160   |    |

Table 61
